# Supplementary material for: Malus hupehensis leaves: a functional beverage for alleviating hepatic inflammation and modulating gut microbiota in diabetic mice
Source: Royal Society of Chemistry journal article supplement (doi:10.1039/d4fo05325g), 2025-01-01
Supplement: d4fo05325g1.xlsx [file d4fo05325g1.xlsx]

## Sheet: Sheet1
Name	CompositeScore	Formula	mzmed	rtmed	ppm	type	ms2Adduct	MS2	level	Relative abundance
Oleamide	0.958751	C18H35NO	282.278	735.697	0.203945	pos	M+H	282.278451;83.085249;69.069999;97.100697;57.069614	level1	1.56501e+10
Herbacetin	1	C15H10O7	303.049	116.427	0.664375	pos	[M+H]+	303.048383;304.051915;229.048331;153.017789;257.045818	level2	1.48814e+10
quercetin 7-O-alpha-L-rhamnopyranoside	0.879168	C21H20O11	449.107	70.2242	0.284853	pos	[M+H]+	303.04744;449.201935;85.028287;71.048848;123.043531	level3	7.86239e+09
dehydroaltenusin	0.999996	C15H12O6	289.07	50.0483	1.60857	pos	[M+H]+	139.037792;123.04373;291.08005;147.044002;165.056952	level3	6.88641e+09
Quercitrin	0.967061	C21H20O11	447.092	122.849	1.86505	neg	[M-H]-	300.028441;447.092662;301.035454;271.023382;255.029107	level2	4.64508e+09
Phloretin	0.965023	C21H24O10	437.143	142.946	0.98861	pos	M+H	107.049003;341.101028;317.101299;275.092206;353.098575	level1	4.59303e+09
Delphinidin	1	C15H11O7	303.049	193.485	0.851213	pos	[M]+	303.048274;304.051379;229.047686;153.017704;257.045087	level2	3.67502e+09
Sieboldin	0.861339	C21H24O11	451.125	113.617	1.15313	neg	[M-H]-	167.033839;289.07231;125.02373;123.044303;271.060545	level3	3.40763e+09
Caffeic acid	0.999979	C9H8O4	181.049	40.6121	0.826937	pos	[M+H]+	181.048191;153.053865;182.052811;55.017917;163.037728	level2	3.39686e+09
Kaempferol-3-O-glucoside	0.985286	C21H20O11	449.107	112.291	0.504612	pos	[M+H]+	287.051334;85.028398;288.057505;97.028414;69.033465	level2	3.368e+09
Quercetin-3-O-glucoside	0.881637	C21H20O12	463.087	82.5	1.06675	neg	[M-H]-	300.027952;463.088248;301.03467;271.023096;255.027778	level2	3.33287e+09
ethyl 4-(7-acetyl-4,6-dihydroxy-3,5-dimethyl-2-oxo-2,3-dihydrobenzofuran-3-yl)-4-(7-acetyl-4,6-dihydroxy-3,5-dimethylbenzofuran-2-yl)-3-oxobutanoate	0.611959	C30H30O12	581.165	262.974	2.49793	neg	[M-H]-	273.075285;167.03381;581.171451;125.023657;123.045708	level3	3.08805e+09
Baccatin III	1	C31H38O11	645.255	360.387	0.375933	neg	M+CH3COO	273.07543;647.263535;274.080212;167.033923;275.08492	level1	2.40313e+09
NSC650386	0.804444	C27H34O15	597.18	92.9723	2.64145	neg	[M-H]-	435.129955;273.075537;167.033955;597.185332;125.023656	level3	2.31316e+09
alpha-Pyrufuran	0.849974	C15H14O5	275.091	236.056	1.1432	pos	[M+H]+	231.066324;275.092366;107.049081;105.069644;213.053393	level2	2.27587e+09
Stearamide	0.993881	C18H37NO	284.294	772.974	0.779536	pos	[M+H]+	284.292832;88.075134;57.069559;102.091349;285.296532	level2	2.25344e+09
Luteolin-7-glucoside	0.979772	C21H20O11	447.092	68.8999	0.478152	neg	[M-H]-	447.092864;285.039321;284.031174;151.00354;327.048957	level2	1.94895e+09
Dihydroluteolin	0.997076	C15H12O6	289.07	130.129	1.5704	pos	[M+H]+	289.070076;153.017709;163.037737;179.033011;145.027627	level2	1.77834e+09
(1R,3R,4S,5R)-1,3,4-trihydroxy-5-[(E)-3-(4-hydroxyphenyl)prop-2-enoyl]oxycyclohexane-1-carboxylic acid	0.828255	C16H18O8	337.093	49.0347	0.918692	neg	[M-H]-	163.039193;119.05049;191.056366;173.044427;337.093249	level2	1.69077e+09
8-O-beta-D-glucopyranosyl-6-hydroxy-2-methyl-4H-1-benzopyran-4-one	0.743675	C16H18O9	353.087	40.9795	0.0760797	neg	[M-H]-	191.056379;111.008831;173.00894;353.073446;87.008753	level3	1.61961e+09
Jacaglabroside B	1	C30H30O13	597.163	235.221	2.77478	neg	[M-H]-	167.033951;599.168908;273.075474;125.023729;274.080321	level3	1.44024e+09
5,7-dihydroxycoumarin	1	C9H6O4	179.033	110.559	1.84571	pos	[M+H]+	179.03293;180.037509;133.10123;107.085006;161.096482	level2	1.41635e+09
benzaldehyde	0.999593	C7H6O	107.049	152.83	1.95763	pos	[M+H]+	107.04902;79.054075;108.052666;95.049364;105.044971	level3	1.2916e+09
Marein	0.911229	C21H22O11	449.107	48.8284	1.75357	neg	M-H	151.003995;287.054434;135.044865;449.107938;125.023908	level1	1.17082e+09
4-O-beta-D-(6-O-vanilloylglucopyranosyl)vanillic acid|4-O-??-D-(6-O-Vanilloyl glucopyranosyl) vanillic acid	0.892346	C22H24O12	479.119	54.4507	0.802178	neg	[M-H]-	479.11285;299.057337;167.03379;151.00382;461.10937	level3	1.11047e+09
6-Hydroxyluteolin 7-glucoside	0.922094	C21H20O12	465.101	83.5018	0.787678	pos	M+H	303.048326;85.028395;304.051222;97.028394;69.03344	level1	1.00388e+09
aceronidin|leucocyanidin-3-O-beta-D-glucoside	0.67801	C21H22O11	449.11	131.792	1.1772	neg	[M-H]-	167.034027;289.072696;125.02396;151.004085;123.044461	level3	9.11455e+08
2,6-Dihydroxybenzoic acid	0.737585	C7H6O4	153.019	71.4431	1.46034	neg	M-H	153.019392;109.029734;135.009;65.039812;67.019093	level1	9.08839e+08
Grevilloside F	0.872388	C15H18O9	341.087	40.3212	0.184958	neg	[M-H]-	179.034281;135.044454;341.085959;89.024029;59.013831	level3	8.68518e+08
Anhydro-22-deoxo-3-epiisocucurbitacin D	0.998472	C30H44O5	485.325	430.307	0.718968	pos	[M+H]+	443.306033;441.331519;487.333978;423.317488;107.084732	level3	8.00405e+08
5-methoxy-3-methyl-4-[(2S,3R,4S,5S,6R)-3,4,5-trihydroxy-6-[[(2R,3R,4S,5S,6R)-3,4,5-trihydroxy-6-(hydroxymethyl)oxan-2-yl]oxymethyl]oxan-2-yl]oxy-3H-benzo[f][2]benzofuran-1-one	0.733083	C26H32O14	567.17	123.701	1.06827	neg	[M-H]-	273.075539;167.033864;567.170556;125.023663;289.073324	level3	7.79498e+08
-16alpha-acetoxy-heteroclitalactone H|heteroclitalactone J	0.768922	C34H42O9	593.272	512.784	0.342123	neg	[M-H]-	593.263649;152.996605;277.216508;241.013374;78.959315	level3	7.70729e+08
dysoxin 1b	0.937769	C39H54O7	633.379	556.567	0.299345	neg	[M-H]-	633.380324;145.029385;70.376013;119.050546;589.381623	level3	7.66389e+08
3-(3,4-dihydroxyphenyl)-1-(2,3,4-trihydroxyphenyl)prop-2-en-1-one	0.881452	C15H12O6	287.056	183.883	0.536744	neg	[M-H]-	153.008118;135.044998;151.004066;152.006785;289.061175	level3	7.57852e+08
L-Malic acid	0.847103	C4H6O5	133.014	32.8028	0.0248526	neg	[M-H]-	115.003383;133.01492;71.013784;72.992758;89.0245	level2	7.43897e+08
Eremopetasinorol 3-ketone	0.887876	C13H18O2	207.137	60.0777	0.885021	pos	[M+H]+	207.1365;149.096211;95.084976;123.079897;189.127326	level3	6.95666e+08
4-methyl-7,11-heptadecadienal	0.89779	C18H32O	265.252	735.413	0.29261	pos	[M+H]+	265.250038;69.070002;83.085208;97.100632;95.084956	level3	6.72433e+08
FA 18:1+3O	0.990728	C18H34O5	329.233	313.115	0.881338	neg	[M-H]-	329.233047;211.133123;229.143052;171.101991;139.11244	level2	6.64926e+08
2-Isopropylmalic acid	0.968289	C7H12O5	175.061	45.7744	0.0212375	neg	[M-H]-	175.061734;115.040372;113.061134;85.065646;72.992899	level2	6.62014e+08
13-deacetylisodecipidone|butanoic acid rel-(2R,3R,3aS,4S,4aS,5S,8R,8aS,9R,10aS)-3,5,10a-tris(acetyloxy)-1,2,3,3a,4,4a,5,8,8a,9,10,10a-dodecahydro-9-hydroxy-4a-(hydroxymethyl)-2,9-dimethyl-8-(1-methylethenyl)-10-oxobenz[f]azulen-4-yl ester	0.864846	C30H42O11	577.27	534.827	0.959172	neg	[M-H]-	577.274259;80.964773;225.007906;164.985525;94.980444	level3	6.30981e+08
DODECANAMIDE	0.910296	C12H25NO	200.2	514.028	0.904328	pos	[M+H]+	200.198856;88.075164;57.069565;102.091343;74.059732	level3	6.10694e+08
Medicagenic acid	0.918718	C30H46O6	501.323	399.927	1.1812	neg	M-H	501.316744;483.30645;421.306506;457.33094;55.703148	level1	5.98303e+08
Foliachinenoside C	0.847983	C28H38O14	597.219	106.683	2.07612	neg	[M-H]-	551.207177;419.166003;373.130059;404.142284;371.112653	level3	5.96669e+08
Ursolic acid	0.85444	C30H48O3	439.356	701.294	0.480207	pos	[M+H]+	191.179209;203.179245;439.356797;189.164743;95.084855	level2	5.93702e+08
undecylenic acid	0.646866	C11H20O2	183.139	287.293	0.425343	neg	[M-H]-	183.140093;139.112507;165.018424;72.168996;53.911811	level3	5.54427e+08
Melianodiol	0.999347	C30H48O5	487.342	441.401	0.675892	neg	[M-H]-	487.348613;469.334277;54.149672;488.344437;427.326988	level3	5.44998e+08
8??-Ethoxy atractylenolide III	0.831155	C18H26O3	291.194	359.382	2.36603	pos	[M+H]+	291.193486;273.185597;119.085683;81.069254;147.080292	level3	5.39834e+08
15-hydroxy-4betaH,15-dihydrorepandanolide-O-angelate	0.936875	C21H28O7	391.178	211.248	1.45367	neg	[M-H]-	391.180802;79.957331;80.964728;149.027893;263.095152	level3	5.3842e+08
LPC 16:0	0.949573	C24H50NO7P	496.338	596.076	2.98987	pos	[M+H]+	184.073693;104.106681;496.334655;86.096168;124.999872	level2	5.22491e+08
hydroxyeucomic acid	0.793979	C11H12O7	255.051	38.6944	0.80552	neg	[M-H]-	123.044181;255.051917;195.028546;149.060646;87.008859	level3	5.18357e+08
3-O-p-trans-Coumaroylalphitolic acid	0.996865	C39H54O6	617.384	665.541	0.631327	neg	[M-H]-	617.388594;145.029319;68.599204;119.050532;618.390454	level3	5.12422e+08
3'-Hydroxymethylrocaglate	0.848625	C28H28O9	507.163	161.535	0.531798	neg	[M-H]-	507.159758;111.008645;59.013737;101.02494;461.203788	level3	5.08803e+08
cordepressenic acid	0.944536	C30H44O6	499.305	486.096	2.62755	neg	[M-H]-	499.301849;455.316909;481.296741;407.290834;451.285876	level3	4.78246e+08
Arthromerin A	0.755944	C20H22O9	405.118	185.798	1.46824	neg	[M-H]-	273.074894;167.033903;243.064595;125.023874;123.045874	level3	4.74385e+08
3,5,7-O-triacetyl-7-O-benzoyl-15-hydroxycheiradone	0.746789	C33H40O11	611.257	62.3189	2.5226	neg	[M-H]-	611.24892;251.128792;431.191677;207.136911;89.024497	level3	4.64269e+08
2-hydroxy-2-[(4-hydroxyphenyl)methyl]butanedioic Acid	0.738186	C11H12O6	239.055	41.8355	2.26514	neg	[M-H]-	239.053539;179.034161;107.049946;177.055312;149.06077	level3	4.45269e+08
Rubicoumaric acid	0.702536	C39H54O6	619.398	665.976	0.406941	pos	[M+H]+	147.04365;437.341521;165.054888;203.179469;189.16492	level3	4.30417e+08
2,3-Dihydroxy-4-methoxybenzaldehyde	0.868588	C8H8O4	169.049	55.234	0.0609654	pos	[M+H]+	169.048397;141.054776;151.037979;43.017918;123.043871	level3	4.28167e+08
Isoketochabrolic acid	0.906897	C18H28O3	293.21	282.348	0.888735	pos	[M+H]+	275.201182;293.213203;81.069941;95.085779;107.084665	level3	4.25413e+08
SCHEMBL611034	0.651931	C29H38O6	481.256	627.057	1.97796	neg	[M-H]-	481.257503;152.996433;245.042016;253.218782;78.959298	level3	3.909e+08
Atractyloside G	0.733377	C21H36O8	417.247	206.149	0.380048	pos	[M+H]+	255.065989;167.070095;417.155693;107.048401;181.049248	level3	3.82758e+08
Epigallocatechin	0.975482	C15H14O7	305.069	45.7744	4.21989	neg	M-H	305.068144;96.959606;225.113084;59.013838;217.05047	level1	3.77965e+08
Wilforic acid E	0.998856	C30H46O5	485.327	507.12	0.14121	neg	[M-H]-	485.327714;467.315998;53.925595;486.330008;441.344283	level3	3.67217e+08
Demethylwedelolactone	0.687212	C15H8O7	299.02	193.123	2.14806	neg	[M-H]-	299.0201;271.023259;199.038244;243.0282;227.034528	level2	3.60054e+08
3-phenyl-1-(2,4,6-trihydroxyphenyl)propan-1-one	0.818606	C15H14O4	259.096	243.883	1.06492	pos	[M+H]+	105.069497;91.05451;259.095476;133.064539;127.03895	level2	3.54685e+08
Gnetifolin E	0.918803	C21H24O9	419.134	239.72	0.905366	neg	[M-H]-	257.083245;213.090845;125.023516;239.071121;419.133933	level3	3.52978e+08
butinflavan-(4beta->8)-epigallocatechin	0.607204	C30H26O11	563.154	237.363	2.23445	pos	[M+H]+	227.067733;269.081196;437.122496;127.038907;153.017544	level3	3.44959e+08
4'-beta-D-glucopyranosyloxy-3'-hydroxybenzyl 4-O-methylprotocatechuate|oreganol-B	0.871899	C21H24O11	451.124	128.118	0.395765	neg	[M-H]-	167.033928;289.072471;125.023817;123.044283;271.06015	level3	3.39399e+08
2,4-bis(4-hydroxyphenyl)cyclobutane-1,3-dicarboxylic Acid	0.77024	C18H16O6	327.087	71.7062	0.420136	neg	[M-H]-	327.085468;163.039209;119.050462;283.096941;93.034589	level3	3.36928e+08
14-O-Cinnamoylneoline	0.62841	C33H45NO7	568.324	205.625	0.478459	pos	[M+H]+	184.073636;104.106903;568.332207;86.096418;550.31209	level3	3.32484e+08
p-Toluquinone	0.999958	C7H6O2	123.044	107.357	2.87454	pos	[M+H]+	123.043754;95.049319;124.039126;81.0693;67.053814	level3	3.28856e+08
Neryl rhamnosyl-glucoside	0.619765	C22H38O10	461.239	214.292	0.269362	neg	[M-H]-	461.250701;59.013682;101.024691;71.013631;415.238265	level3	3.24562e+08
Fumaric acid	0.919416	C4H4O4	115.004	32.8028	3.24527	neg	[M-H]-	71.013613;115.003121;59.013733;41.003307;104.784051	level2	3.21004e+08
Theaspirone A	0.857329	C13H20O2	209.153	61.6785	1.56744	pos	[M+H]+	209.154917;167.143834;83.048816;55.054119;151.111499	level3	3.11158e+08
naringenin-7-O-glucoside	0.913668	C21H22O10	433.113	74.3538	0.975148	neg	[M-H]-	271.060728;151.003919;433.110184;119.0505;107.014064	level2	3.00675e+08
3,3''-dihydroxy-6'-O-desmethylterphenyllin	0.707892	C19H16O7	355.082	280.457	0.401168	neg	[M-H]-	355.082715;207.029546;313.069315;179.034208;205.048902	level3	2.95784e+08
(1R,2R,4aS,6aS,6bR,10S,12aR,14bS)-1,8,10-trihydroxy-1,2,6a,6b,9,9,12a-heptamethyl-2,3,4,5,6,6a,7,8,8a,10,11,12,13,14b-tetradecahydropicene-4a-carboxylic acid	0.973706	C30H48O5	489.357	438.935	1.57181	pos	[M+H]+	201.163971;205.157562;407.32984;453.333631;425.341324	level2	2.9175e+08
Cladobotrin III	0.767657	C12H12O6	251.056	83.0744	0.914814	neg	[M-H]-	251.05667;137.05975;189.056329;207.065296;181.049068	level3	2.8683e+08
Deca-2,4-dienal	0.883833	C10H16O	153.127	147.193	0.365269	pos	[M+H]+	43.054269;153.12695;71.049004;81.069337;135.116412	level3	2.86666e+08
Pratenol B	0.80559	C15H12O7	305.065	60.4038	0.131106	pos	[M+H]+	153.017693;259.06011;305.065652;287.056865;245.042547	level3	2.81603e+08
2alpha-(3-angeloyloxy-2-hydroxy-2-methyl butyryloxy)-labda-7,13Z-dien-15-oic acid|2alpha-<3-angeloyloxy-2-hydroxy-2-methyl butyryloxy>-labda-7,13Z-dien-15-oic acid	0.956346	C30H46O7	517.316	367.711	1.14947	neg	[M-H]-	517.31682;499.302664;407.291565;57.480493;451.287057	level3	2.74294e+08
2,3-Dihydroxybenzoic acid	0.989652	C7H6O4	153.019	39.9756	1.46992	neg	M-H	109.029732;153.019411;108.021457;81.034694;110.032538	level1	2.71072e+08
CAFFEATE	0.977474	C9H8O4	163.039	233.253	3.46899	pos	[M-H2O+H]+	163.037525;135.044532;145.027332;117.033292;89.03824	level2	2.68235e+08
Brunfelsamidine	1	C5H7N3	110.071	899.545	0.195144	pos	[M+H]+	110.070708;111.090946;42.033816;69.044533;87.003633	level3	2.6759e+08
β-Damascenone	0.98829	C13H18O	191.142	163.463	2.50633	pos	M+H	191.141385;173.130647;133.101406;135.080567;69.033537	level1	2.66596e+08
5,7-Dihydroxychromone	0.996042	C9H6O4	177.019	115.165	0.203693	neg	[M-H]-	177.01856;133.029582;89.039637;135.008731;91.01936	level2	2.64711e+08
Coumaric acid	1	C9H8O3	163.04	76.2833	2.02759	neg	[M-H]-	120.052833;164.042949;119.050273;163.041425;80.050238	level2	2.6464e+08
D-Sorbitol	0.988433	C6H14O6	181.072	32.8028	2.11486	neg	M-H	181.07251;59.013751;89.024495;71.013777;101.024905	level1	2.64057e+08
3beta-hydroxy-1,11-dioxo-ergosta-8,24(28)-diene-4alpha-carboxylic acid	0.977939	C29H42O5	471.309	519.093	3.06553	pos	[M+H]+	471.308066;425.342686;151.075779;187.148276;472.243708	level3	2.63464e+08
Arjungenin	0.998856	C30H48O6	503.336	374.079	1.05131	neg	M-H	503.343344;485.327932;55.926862;504.333941;443.317468	level1	2.61965e+08
rel-(4S,6S,9S,10S,Z)-4,6,9-trihydroxy-10-nonyl-3,4,5,6,9,10-hexahydro-oxecin-2-one	0.864333	C18H32O5	327.218	290.62	1.24339	neg	[M-H]-	327.220243;183.139687;85.029657;211.132779;251.166447	level3	2.60734e+08
Loliolide	0.993616	C11H16O3	197.117	113.344	1.29641	pos	[M+H]+	197.117222;179.104987;135.116087;133.101097;107.085818	level2	2.58955e+08
Asiatic acid	1	C30H48O5	487.342	480.04	1.80666	neg	[M-H]-	487.335703;488.344281;54.149655;79.348128;76.829124	level2	2.5721e+08
Tetradecanamide	0.959017	C14H29NO	228.231	621.119	1.80799	pos	[M+H]+	228.230307;88.075169;57.069554;102.091383;229.235192	level3	2.49916e+08
GALACTOSAMINE	0.849603	C6H13NO5	202.065	32.1534	25.945	pos	[M+Na]+	202.050985;84.044281;143.033804;174.055808;97.028367	level2	2.43952e+08
L-Prolyl-L-leucin-anhydrid|Prolyl-leucyl-anhydrid	0.866099	C11H20N2O3	229.154	33.8544	1.43551	pos	[M+H]+	229.155912;142.085886;70.06516;98.059754;194.080167	level3	2.41884e+08
6-PHENYLDODECANE	0.735737	C18H30	247.242	735.413	2.13078	pos	[M+H]+	247.239731;135.116443;121.101262;107.085038;93.069904	level3	2.40494e+08
3-Hydroxy-beta-ionone	0.919343	C13H20O2	209.153	231.238	0.300307	pos	[M+H]+	209.151354;191.14141;151.111454;109.101401;125.095688	level2	2.38516e+08
mimusopsic acid	0.999381	C30H44O5	483.312	540.098	1.7131	neg	[M-H]-	483.306461;465.296739;53.701939;484.313639;421.307523	level3	2.38427e+08
(-)-(8S)-8-phenyl-1,5,9,13-tetraazacycloheptadecan-6-one|(-)-(S)-8-phenyl-1,5,9,13-tetraazacycloheptadecan-6-one|(-)-(S)-protoverbine|(-)-protoverbine|protoverbine	0.966509	C19H32N4O	331.249	299.346	1.0502	neg	[M-H]-	331.249765;313.23536;329.23314;127.113177;157.123337	level3	2.38409e+08
Staphylionoside I	0.63805	C20H36O9	419.229	134.272	2.06879	neg	[M-H]-	419.09255;299.057068;273.074684;301.072518;167.036466	level3	2.37243e+08
UNII-T37N9ZFY0B	0.74964	C13H16O4	235.097	373.423	0.911174	neg	[M-H]-	235.097453;180.041837;176.083762;165.018529;121.029693	level3	2.35542e+08
Citreorosein	1	C15H10O6	287.054	193.277	1.5446	pos	[M+H]+	287.051386;288.057755;153.017711;135.042909;107.048938	level2	2.35094e+08
Swertianolin	0.771469	C20H20O11	435.094	206.041	1.21068	neg	M-H	435.097457;137.023431;152.011294;273.075785;153.019557	level1	2.33069e+08
(2RS)-2-O-(3-hydroxy-2-phenylpropionyl)-D-glucose	0.931431	C15H20O8	327.108	54.8583	0.443948	neg	[M-H]-	165.0565;121.06504;147.045721;327.106861;59.013876	level3	2.3177e+08
Pomolic acid	0.99998	C30H48O4	471.348	547.004	1.39715	neg	M-H	471.342018;52.372522;472.350617;401.299937;407.329885	level1	2.26468e+08
schisanlactone B	0.75412	C30H42O4	467.315	539.783	0.776557	pos	[M+H]+	423.285154;467.318566;421.306463;123.079616;119.085396	level3	2.25055e+08
2??,3??-Dihydroxy-19-oxo-18,19-seco-urs-11,13(18)-dien-28-oic acid	0.852489	C30H46O5	487.34	407.428	2.77544	pos	[M+H]+	487.347813;441.335209;469.327438;423.328308;147.116795	level3	2.2421e+08
9,10-dihydroxyhexadecanoic acid	0.962433	C16H32O4	287.223	323.07	0.120295	neg	[M-H]-	287.223387;269.211865;151.003924;135.044827;241.215072	level3	2.23835e+08
(±)-Dihydroactinidiolide	0.998283	C11H16O2	181.122	297.311	2.09839	pos	M+H	181.121234;135.116329;163.110095;107.084892;121.101162	level1	2.23501e+08
Choline	0.997692	C5H14NO+	104.107	32.9999	2.71926	pos	[M+]	104.106661;60.080482;45.033388;105.109633;87.043466	level2	2.22832e+08
(+)-7-(3-methyl-4-carboxybutanoxy)umbelliferone methyl ester	0.714361	C15H16O6	293.102	345.116	1.83135	pos	[M+H]+	131.048266;275.092471;103.053904;81.033302;69.033508	level3	2.21711e+08
tanzawaic acid B	0.893667	C18H26O2	275.2	433.36	0.294756	pos	[M+H]+	275.202054;107.049071;257.189509;81.069219;105.069302	level3	2.16641e+08
NICOTINAMIDE	1	C6H6N2O	123.055	33.6962	0.360663	pos	[M+H]+	123.055148;124.039188;80.049452;96.043498;100.024582	level2	2.15652e+08
Phthalic acid	0.995724	C8H6O4	149.023	595.594	1.77154	pos	[M-H2O+H]+	149.021969;121.02769;65.038237;150.026789;93.033168	level2	2.15034e+08
PHENYLALANINE	0.990834	C9H11NO2	166.086	36.4796	0.92048	pos	[M+H]+	120.080771;166.085587;131.048227;103.05395;121.083634	level2	2.14198e+08
Glutamylphenylalanine	0.960329	C14H18N2O5	293.124	45.7025	0.776335	neg	[M-H]-	293.126869;131.071759;59.013789;89.024499;71.013819	level2	2.11864e+08
lupinisoflavone H	1	C24H24O7	425.156	60.968	0.35121	pos	[M+H]+	425.153391;426.153894;147.044022;60.093945;115.60456	level3	2.10852e+08
Berberine	0.990157	C20H18NO4	336.122	204.527	0.485584	pos	[M+H]+	336.119753;321.095793;320.089602;292.095278;306.077417	level2	2.09414e+08
Naringin	0.638162	C27H32O14	579.172	188.061	1.8814	neg	[M-H]-	273.075296;167.033928;579.176398;435.129412;125.023768	level2	2.06882e+08
Kaempferol	1	C15H10O6	287.054	243.944	0.159977	pos	[M+H]+	287.057132;288.057985;181.048031;107.048911;153.017624	level2	2.0512e+08
4-Megastigmene-3,9-diol	0.812305	C13H24O2	213.185	137.122	2.34744	pos	[M+H]+	177.164448;121.101241;213.184038;99.080537;195.17507	level3	2.04727e+08
Gossypetin	0.618239	C15H10O8	317.03	193.626	0.225637	neg	[M-H]-	299.019991;163.003837;109.029388;190.998958;151.003479	level2	2.04407e+08
ADENINE	1	C5H5N5	136.061	32.758	1.52633	pos	[M+H]+	136.061845;137.063641;119.035772;91.054293;94.039529	level2	1.99829e+08
5,6-cis-5'-epi-puliscabrin	0.781946	C30H44O2	437.34	569.058	0.00883348	pos	[M+H]+	437.340909;189.164689;203.179306;201.164276;215.177808	level3	1.96255e+08
Procyanidin A2	0.736126	C30H24O12	577.133	100.94	1.7549	pos	[M+H]+	153.017695;451.104575;181.048157;257.079559;123.043781	level2	1.94663e+08
(S)-4-methoxy-7-phenyl-7,8-dihydro[1,3]dioxolo[4,5-g]isochromen-5-one	0.646167	C17H14O5	299.09	149.188	0.0202806	pos	[M+H]+	107.048992;193.048931;299.092045;131.048315;173.059418	level3	1.93101e+08
2(Z)-O-feruloylgluconic acid	0.801286	C16H20O10	371.098	71.3901	1.24069	neg	[M-H]-	121.029775;371.095499;249.063339;113.023655;59.01389	level3	1.88118e+08
9,10-DIHYDROXY-8-OXOOCTADEC-12-ENOIC ACID	0.940594	C18H32O5	327.218	259.625	0.405879	neg	[M-H]-	327.22027;199.132593;201.113334;181.122217;169.123445	level3	1.88102e+08
N-Jasmonoylisoleucine	0.867398	C18H29NO4	324.216	349.434	1.0257	pos	[M+H]+	86.096141;151.111379;278.21283;132.100701;324.212796	level2	1.86344e+08
ADENOSINE	0.995859	C10H13N5O4	268.103	33.4117	0.933568	pos	[M+H]+	136.061773;268.103483;137.065206;187.05348;57.033184	level2	1.86255e+08
Bacobitacin A	0.679202	C32H44O9	571.286	604.738	2.6636	neg	[M-H]-	571.294828;255.233602;152.996671;241.013216;78.95854	level3	1.83671e+08
Scopoletin	0.999954	C10H8O4	193.049	53.0067	0.880698	pos	[M+H]+	193.049009;178.025142;194.051165;133.101278;165.016957	level2	1.82835e+08
1-O-acetylrocaglamide	0.806224	C31H33NO8	548.227	163.077	7.21099	pos	[M+H]+	548.22788;70.065138;386.168889;112.086894;107.048934	level3	1.82555e+08
6,7-Dihydroxycoumarin	0.994793	C9H6O4	177.019	48.9176	0.249843	neg	[M-H]-	177.018567;133.029547;105.034277;89.039515;149.023708	level2	1.81175e+08
4-O-(6-O-P-Coumaroyl-beta-D-glucopyranosyl)-P-coumaric acid	0.828914	C24H24O10	471.129	183.517	0.977144	neg	[M-H]-	163.039357;145.029457;119.05055;307.080319;471.133278	level3	1.80934e+08
NSC318730	0.672789	C17H24O3	277.179	379.745	1.03397	pos	[M+H]+	137.059773;277.179764;81.069227;111.043136;231.175878	level3	1.80073e+08
Emodin-8-Beta-D-Glucoside	0.955221	C21H20O10	433.111	49.8549	0.0817009	pos	[M+H]+	219.028248;355.081083;301.069044;313.072316;165.016557	level2	1.79687e+08
pestalofone E	0.841706	C33H36O12	623.22	49.9406	2.89628	neg	[M-H]-	577.207725;89.024472;101.023696;71.013765;131.033914	level3	1.77383e+08
Rupestrin B	0.833377	C32H36O17	691.186	108.914	1.24523	neg	[M-H]-	691.181642;367.079784;243.02853;341.10337;339.085754	level3	1.77366e+08
(2S,6zeta)-3,7-dimethyloct-3(10)-ene-1,2,6,7-tetrol 1-O-beta-D-glucopyranoside|(2S,6?鍗?-3,7-Dimethyloct-3(10)-ene-1,2,6,7-tetrol 1-O-??-D-glucopyranoside	0.945067	C16H30O9	365.18	74.8465	1.73226	neg	[M-H]-	365.178547;111.008625;59.013694;101.02482;203.127524	level3	1.76109e+08
Myrianthic acid	1	C30H48O6	505.35	417.572	1.55553	pos	[M+H]+	461.35017;507.357568;460.352673;459.346579;201.164701	level3	1.75212e+08
Riboflavin	0.995348	C17H20N4O6	377.144	49.3936	0.274044	pos	[M+H]+	377.140449;243.088402;172.0856;69.033559;216.074781	level2	1.74457e+08
Sorbitol	1	C6H14O6	221.041	32.4057	3.47731	pos	[M+H]+	221.042488;222.020507;98.975255;104.1067;86.806288	level2	1.73124e+08
sacranoside B	0.773935	C20H34O10	433.207	135.235	0.557319	neg	[M-H]-	433.207727;89.024418;300.028121;301.035453;59.013625	level3	1.71127e+08
1-Hexadecanoylpyrrolidine	0.643597	C20H39NO	310.31	776.924	0.343542	pos	[M+H]+	310.31255;69.069977;83.085219;57.069563;97.100721	level3	1.69999e+08
Shikimic acid	0.739018	C7H10O5	173.045	47.0695	1.8694	neg	[M-H]-	97.029483;101.060321;173.044456;111.00887;69.034384	level2	1.64992e+08
Loddigesiinol D	0.813919	C17H16O7	331.082	223.73	1.17943	neg	[M-H]-	331.083458;181.049263;287.095034;137.059946;139.039727	level3	1.64606e+08
(2R,3R)-(-)-3,5-dihydroxy-6,7-dimethoxyflavanone	0.908421	C17H16O6	317.099	35.5092	0.915987	pos	[M+H]+	317.101409;107.048317;299.098303;156.10211;211.061767	level3	1.63074e+08
plumieride p-E-coumarate	0.757281	C31H34O13	613.177	277.909	24.9247	neg	[M-H]-	451.136549;329.103942;167.035747;125.024666;289.072731	level3	1.62944e+08
Leucocyanidin	0.783566	C15H14O7	289.068	32.794	1.88248	pos	M+H-H2O	289.069856;127.038956;163.037637;153.01765;177.054048	level1	1.62535e+08
Ganolucidic acid D	0.96395	C30H44O6	499.305	456.255	2.42673	neg	[M-H]-	499.301877;437.305962;455.316591;55.479265;377.282175	level3	1.61338e+08
abyssinone C	0.817457	C20H20O7	373.128	124.729	2.01131	pos	[M+H]+	373.129203;137.059948;151.037882;55.017705;221.081855	level3	1.58869e+08
3beta,23-dihydroxy-lup-20(29)-en-28-oic acid 3beta-caffeate	0.996312	C39H54O7	633.379	626.476	0.331487	neg	[M-H]-	633.380003;161.024181;70.375992;179.034146;135.04412	level3	1.58081e+08
24,25-epoxy-tirucall-7,20(E)-diene-3,23-dione	0.762364	C29H42O3	439.32	429.893	0.281858	pos	[M+H]+	439.322877;421.306235;107.084752;119.085485;187.147678	level3	1.52036e+08
Genistein	1	C15H10O5	271.06	100.328	2.54926	pos	[M+H]+	271.057718;272.062018;153.018113;119.048269;229.047796	level2	1.51962e+08
Clavorubin	0.731078	C16H10O7	313.035	228.645	0.84716	neg	[M-H]-	313.035885;269.047348;225.056219;241.049047;197.061021	level3	1.51634e+08
L-Tryptophan	0.992673	C11H12N2O2	205.097	39.8002	2.41451	pos	[M+H]+	188.070405;146.060024;144.080318;118.064249;205.097402	level2	1.49875e+08
guignardone B	0.825158	C17H24O5	307.155	378.703	0.186896	neg	[M-H]-	307.156911;137.059911;181.049161;139.03967;119.050494	level3	1.49528e+08
3-oxo-D:C-friedo-olena-7,9(11)-dien-29-oic acid|3-oxo-D:C-friedooleana-7,9(11)-dien-29-oic acid	0.851399	C30H44O3	453.335	551.478	0.356268	pos	[M+H]+	453.332878;201.164108;435.327499;407.331284;119.085418	level3	1.48814e+08
Phloretin	0.993023	C15H14O5	273.076	206.303	3.10707	neg	[M-H]-	167.03394;273.074975;123.044346;119.050514;81.034846	level2	1.44128e+08
Me glycoside-4-O-alpha-L-Rhamnopyranosyl-L-rhamnose|Me glycoside-4-O-beta-L-Rhamnopyranosyl-L-rhamnose	0.873107	C13H24O9	323.135	39.6488	1.99555	neg	[M-H]-	323.132116;59.013797;89.024502;71.013823;119.034737	level3	1.43046e+08
13a-hydroxysepticine	0.765246	C24H29NO5	412.216	89.3667	19.7335	pos	[M+H]+	184.073655;104.106779;412.210292;86.096296;125.000054	level3	1.42578e+08
3beta-acetoxy-8alpha-(5-acetoxyangeloyloxy)-eremanthin|3beta-acetoxy-8alpha-<5-acetoxyangeloyloxy>-eremanthin	0.89396	C24H28O8	445.191	33.5498	21.1737	pos	[M+H]+	445.184058;284.055594;446.189135;147.042976;85.028244	level3	1.42396e+08
Betulinic Acid	0.976329	C30H48O3	457.367	701.294	0.238497	pos	[M+H]+	457.366816;203.17892;189.164118;411.364019;191.178954	level2	1.42328e+08
8-Hydroxy-1-methoxy-Z-9-heptadecene-4,6-diyn-3-one	0.945885	C18H26O3	291.194	307.021	2.39098	pos	[M+H]+	291.193487;273.18459;81.069945;119.085557;79.05397	level3	1.41819e+08
2??,3??-Dihydroxyurs-12,19-dien-23,28-oic acid	0.721732	C30H44O6	501.321	367.878	1.62046	pos	[M+H]+	437.307044;501.322003;455.318735;419.28989;187.148015	level3	1.41512e+08
4-Hydroxy-5-methylcoumarin 4-O-beta-D-glucopyranoside	0.866687	C16H18O8	339.107	48.9524	1.22785	pos	[M+H]+	177.054259;145.027695;339.106665;117.033366;178.056777	level3	1.41498e+08
Fabianine	0.924451	C14H21NO	220.169	148.573	0.382199	pos	[M+H]+	220.169369;176.14148;221.172693;162.090089;118.064339	level3	1.41147e+08
L-Isoleucine	0.97545	C6H13NO2	132.101	35.2164	2.28688	pos	M+H	86.096224;132.100788;69.070034;44.049428;87.099089	level1	1.40188e+08
gamma-Pyrufuran	0.772867	C15H14O6	291.086	258.383	0.852158	pos	[M+H]+	259.060355;231.066653;291.086082;216.040991;273.186003	level2	1.39024e+08
23,27-Epoxy-3-oxolanosta-7,23,25(27)-trien-26-oic acid|Pseudolarifuroic acid	0.77885	C30H42O4	467.315	430.337	0.823026	pos	[M+H]+	423.284864;467.318442;421.307017;187.147516;119.08543	level3	1.38876e+08
(5R,7R,10S)-Isopterocarpolon ??-D-glucopyranoside	0.76732	C21H34O7	399.236	209.326	2.36534	pos	[M+H]+	147.11637;81.069841;133.100964;219.172147;109.101115	level3	1.36474e+08
(5Z)-5-(2-hydroxytetradecylidene)-furan-2(5H)-one|hygrophoron G12|hygrophorone G12	0.878155	C18H30O3	295.226	312.776	0.944386	pos	[M+H]+	277.213215;295.224825;81.069257;67.053807;95.084951	level3	1.33218e+08
JA-Ile	0.969861	C18H29NO4	322.203	349.943	1.61546	neg	[M-H]-	130.086833;322.199234;128.1081;172.097212;58.029551	level3	1.33168e+08
(+)-Pyripyropene G	0.698617	C27H33NO6	468.234	197.337	1.00072	pos	[M+H]+	184.07367;104.1067;468.229771;86.096175;124.999806	level3	1.32955e+08
2''-O-Feruloylaloesin	0.641389	C29H32O12	571.183	252.533	2.25177	neg	[M-H]-	273.075011;167.033957;463.145937;573.198658;300.095906	level3	1.32488e+08
gardenone	0.880655	C12H20O3	213.148	175.207	0.00775647	pos	[M+H]+	213.146455;97.064989;71.048895;195.138879;55.054113	level3	1.31723e+08
Multinoside A	1	C27H30O16	609.145	130.688	1.67787	neg	[M-H]-	111.008891;611.140021;173.009058;112.012342;125.023803	level2	1.31358e+08
3-Furanoic acid	0.885905	C5H4O3	111.009	86.073	2.34468	neg	M-H	111.008911;67.019123;41.003332;83.013948;41.998622	level1	1.30876e+08
7-deacetyl-7-angeloyl-6alpha-hydroxyazadiradione	0.649078	C31H38O6	505.256	552.098	0.104508	neg	[M-H]-	277.216104;505.260123;152.995859;280.237709;78.958753	level3	1.29608e+08
17,22-seco-3-oxo-22,23-dihydroxy-Delta12,16-oleanoic acid|22,23-Dihydroxy-3-oxo-17,22-seco-12,16-oleanadien-28-oic acid	0.999642	C30H46O5	485.327	533.047	0.230055	neg	[M-H]-	485.327182;455.316651;53.926045;486.330919;437.305144	level3	1.2946e+08
Flustramine B	0.998081	C21H29BrN2	389.155	46.8317	2.2382	pos	[M+H]+	389.155974;107.048681;390.162008;86.095997;131.049445	level3	1.29275e+08
Saponaceolide B	0.778411	C30H46O6	503.335	356.413	2.16875	pos	[M+H]+	503.335203;457.332427;187.148017;233.154696;439.323817	level3	1.29219e+08
Plantagoside	0.611947	C21H22O12	467.118	44.0721	1.11235	pos	M+H	305.065698;245.04274;259.060553;232.035204;217.050418	level1	1.27987e+08
2,3,4-tri-O-isobutanoyl-D-glucopyraniside	0.630258	C18H30O9	389.181	217.058	1.27697	neg	[M-H]-	389.256666;227.128996;183.139894;165.127708;251.128629	level3	1.2765e+08
20-O-Benzoyl-13-O-dodecanoateingenol	0.977283	C39H54O8	649.373	517.432	0.509791	neg	[M-H]-	649.364432;161.024187;72.153536;650.378827;605.3783	level3	1.26062e+08
6-Hydroxy-1,3,5,7-tetramethoxy-9H-xanthene-9-one	0.94503	C17H16O7	333.094	47.4492	0.287064	pos	[M+H]+	333.094078;315.097904;287.099723;83.085373;334.091625	level3	1.25981e+08
C12-AS (TENTATIVE)	0.992901	C12H26O4S	265.148	530.208	0.525148	neg	[M-H]-	265.149455;96.959611;266.152308;78.958507;227.911522	level2	1.25851e+08
Sphinganine	0.984503	C18H39NO2	302.305	476.017	0.242796	pos	[M+H]+	302.302636;88.075159;106.086426;284.292877;70.06519	level2	1.23901e+08
Proceragenin A	0.995919	C30H46O4	469.331	525.38	3.00213	neg	[M-H]-	469.334046;425.340285;423.324868;52.148506;470.336233	level3	1.23896e+08
16alpha-hydroxy protobassic acid|16alpha-hydroxyprotobassic acid|2beta,3beta,6beta,16alpha,23-pentahydroxyolean-12-en-28-oic acid	0.668043	C30H48O7	519.331	329.53	1.27388	neg	[M-H]-	457.32952;519.328401;409.311051;427.317039;397.309077	level3	1.23566e+08
(+)-Epicatechin	0.975994	C15H14O6	291.083	32.758	8.41354	pos	[M+H]+	139.037797;123.043784;147.043921;165.055104;291.086092	level2	1.22479e+08
Solaphyllidin|Solaphyllidine	0.737453	C29H47NO5	488.346	499.746	22.2393	neg	[M-H]-	488.344204;277.215865;470.323144;291.195778;54.260298	level3	1.22469e+08
Senegenin	1	C30H45ClO6	537.301	564.005	0.66237	pos	[M+H]+	537.302731;538.306944;59.701672;104.106562;184.073837	level3	1.20125e+08
Emodin	1	C15H10O5	271.06	236.087	2.35486	pos	[M+H]+	271.057655;272.061994;153.017622;119.048428;159.080531	level2	1.17929e+08
Aralidioside	0.836396	C18H24O13	447.114	34.6452	0.207966	neg	[M-H]-	447.115332;152.011155;108.021542;109.029801;153.019486	level3	1.17442e+08
2-oct-1-en-3-yloxy-6-[(3,4,5-trihydroxyoxan-2-yl)oxymethyl]oxane-3,4,5-triol	0.920362	C19H34O10	467.214	176.033	2.36331	neg	[M+FA-H]-	421.212235;289.167185;101.024879;71.013742;161.046091	level2	1.17425e+08
Traumatic Acid	0.990194	C12H20O4	227.129	295.6	1.1115	neg	M-H	183.140087;227.128962;165.127896;209.119093;184.141326	level1	1.17196e+08
Filixic acid ABA	0.923146	C32H36O12	613.227	212.166	2.33792	pos	[M+H]+	613.224128;167.069091;181.048012;417.157229;173.059763	level3	1.1703e+08
methyl ganoderate L	0.702102	C31H48O8	547.328	429.868	0.81325	neg	[M-H]-	501.317858;547.324774;115.003433;78.959373;116.929372	level3	1.1598e+08
ent-13-epi-8,13-epoxy-14R,15-dihydroxylabdan-3-one	0.8639	C20H34O4	339.252	270.151	0.43866	pos	[M+H]+	97.100674;321.241707;177.054;143.105728;55.054144	level3	1.15101e+08
9,16-dioxooctadec-10,12,14-trienoic acid	0.88285	C18H26O4	305.175	389.949	0.336311	neg	[M-H]-	305.176627;135.080611;249.14846;125.097606;97.066253	level3	1.14534e+08
4-O-Galloylchlorogenic acid	0.844233	C23H22O13	505.1	120.359	4.07336	neg	[M-H]-	505.096805;178.999664;135.008985;91.019214;163.03938	level3	1.13331e+08
(2S,3S)-2-(4-hydroxy-3,5-dimethoxybenzyl)-3-(5-methoxy-3,4-methylenedioxybenzyl)butyrolactone	0.737957	C22H24O8	417.154	266.6	0.395126	pos	[M+H]+	167.070915;181.050623;417.155586;191.070991;81.0699	level3	1.13331e+08
(3aR,5aR,7S,9aS,9bR)-3a,5a,7,8,9,9a,9b-octahydro-3a,7-dihydroxy-7,9b-dimethhylnaphtho[1,2-c]furan-1(3H)-one|(?)-oblongolide C|oblongolide C	0.850923	C14H20O3	237.148	223.178	0.921912	pos	[M+H]+	237.149263;159.1169;181.086252;219.137808;163.075093	level3	1.12343e+08
Erigerenone B	0.676863	C12H18O4	227.127	222.91	0.286165	pos	[M+H]+	227.125399;163.110614;135.116573;95.085097;145.101091	level3	1.11837e+08
Cetraric acid	0.721087	C20H18O9	401.087	207.803	1.03375	neg	[M-H]-	401.07937;357.098711;207.065019;313.109028;309.039118	level3	1.11816e+08
Europetin 3-rhamnoside	0.851681	C22H22O12	477.104	125.607	1.81916	neg	[M-H]-	477.104742;168.007051;331.068985;125.023732;145.029216	level3	1.10252e+08
Dimethyl malate	0.838729	C6H10O5	161.045	39.4183	2.89599	neg	[M-H]-	161.046147;101.024823;59.013714;99.044807;87.008745	level3	1.10245e+08
SCHEMBL4970057	0.862016	C15H12O6	287.055	212.64	2.6468	neg	[M-H]-	287.054115;245.045908;151.003694;135.044598;137.024925	level3	1.10156e+08
16-O-beta-D-Glucopyranoside-(ent-3beta, 13xi)-7-Pimarene-3, 15, 16, 18-tetrol	0.809038	C26H44O9	501.304	219.442	0.0323742	pos	[M+H]+	465.191761;81.069844;97.100475;95.084744;303.231148	level3	1.10105e+08
Chiisanogenin	0.841328	C30H44O5	485.325	539.501	0.366574	pos	[M+H]+	421.306267;485.322879;467.319132;439.32462;187.147706	level3	1.08938e+08
Neohydroxyaspergillic Acid	0.975393	C12H20N2O3	241.154	33.8544	1.03332	pos	[M+H]+	241.15312;58.065089;84.080319;196.094584;242.158952	level3	1.08829e+08
DGMG 18:3	0.771446	C33H56O14	721.365	495.736	0.130919	neg	[M+HCOO]-	397.135351;277.21591;415.146356;675.362988;101.024618	level2	1.08515e+08
2-alpha-hydroxy-3-oxours-12-en-28-oic acid|2-hydroxy-3-oxo-12-ursen-28-oic acid	0.788477	C30H46O4	471.345	495.228	2.21392	pos	[M+H]+	471.299576;205.157172;443.35163;187.14739;425.34853	level3	1.08446e+08
Methyl (3x,10R)-dihydroxy-11-dodecene-6,8-diynoate 10-glucoside	0.89495	C19H26O9	397.149	290.18	1.62121	neg	[M-H]-	235.097571;397.145271;180.041754;176.083642;236.099663	level3	1.07739e+08
Myltaylorione A	0.810942	C30H42O2	435.324	552.376	0.73321	pos	[M+H]+	435.327747;201.164231;95.08494;389.321381;119.085643	level3	1.06292e+08
Sinapoylhexoside	0.893548	C17H22O10	387.2	59.8016	0.0158826	pos	[M+H]+	207.136132;95.084732;387.148804;123.07976;149.095849	level2	1.05619e+08
2-Methyl-5-(Prop-1-En-2-Yl)phenol	0.910019	C10H12O	149.095	61.3355	4.20198	pos	[M+H]+	149.096167;121.101221;131.084254;93.069857;105.069462	level3	1.0457e+08
(9S,10E,12Z,15Z)-9-Hydroxy-10,12,15-octadecatrienoic acid	0.978159	C18H30O3	277.215	312.431	1.00461	pos	[M+H]+	277.213195;93.069906;107.084956;81.069283;79.054048	level2	1.03816e+08
(1R-cis)-1-(1,2-dimethyl-3-methylenecyclopentyl)-4-methyl-1,4-Cyclohexadiene	0.989103	C15H22	203.179	259.9	0.132923	pos	[M+H]+	203.179426;147.116954;133.101447;119.085698;105.069517	level3	1.03663e+08
Rutin	0.990817	C27H30O16	609.145	73.4077	0.338778	neg	[M-H]-	609.149598;300.027694;301.034575;271.022995;255.027373	level2	1.03379e+08
Methylisoeugenol	0.871205	C11H14O2	179.106	137.461	0.228585	pos	[M+H]+	179.107532;133.101285;107.084934;120.044493;161.09606	level2	1.03344e+08
3-METHYLHISTAMINE	0.77462	C6H11N3	126.102	783.371	1.06686	pos	[M+H]+	126.102413;59.060099;68.049266;109.075368;85.075498	level2	1.03321e+08
N-Carbamoyl-2-amino-2-(4-hydroxyphenyl)acetic acid	0.678217	C9H10N2O4	211.071	43.7002	2.03484	pos	[M+H]+	194.044558;211.070352;122.060278;108.043696;87.055313	level2	1.03297e+08
Nigrolineaxanthone U	0.71378	C18H18O7	345.097	308.357	3.05496	neg	[M-H]-	327.085586;345.099106;221.046169;312.061001;206.021404	level3	1.03107e+08
Asperphenamate_130119	0.928207	C32H30N2O4	507.226	524.214	1.97824	pos	[M+H]+	238.121274;105.033372;256.132949;117.070028;224.107301	level2	1.03057e+08
(+)-mitorubrinol acetate|mitorubrinol acetate	0.978577	C23H20O9	441.115	48.1139	1.01306	pos	[M+H]+	441.108288;193.049981;70.064807;123.044222;441.788841	level3	1.01858e+08
2-[(E)-3,7-dimethylocta-2,6-dienyl]-5-(6-hydroxy-1-benzofuran-2-yl)-4-(3-methylbut-2-enyl)benzene-1,3-diol|artopetelin B	0.84389	C29H34O4	447.25	628.171	2.82769	pos	[M+H]+	447.254172;137.000076;155.008838;311.259313;98.983495	level3	1.0147e+08
Quillaic acid	1	C30H46O5	487.34	463.7	0.892604	pos	[M+H]+	487.340297;488.34561;441.330427;189.165012;469.325704	level2	1.00292e+08
Bruceine D	0.642388	C20H26O9	393.15	46.1695	0.0062732	pos	M+H-H2O	216.086533;300.106726;393.149026;240.087063;230.103945	level1	9.90493e+07
Octa-2,4-dienal	0.889694	C8H12O	125.096	213.471	2.52924	pos	[M+H]+	43.017693;125.095637;107.084987;83.04895;55.054247	level3	9.89938e+07
nerizoside	0.920986	C31H46O8	545.312	465.435	0.216621	neg	[M-H]-	501.316563;500.308658;499.30566;547.344691;78.959371	level3	9.83732e+07
2-C-beta-D-glycopyranosyl-1,6,7-trihydroxy-3-methoxyxanthone|homomangiferin	0.725888	C20H20O12	451.094	75.2625	14.0675	neg	[M-H]-	451.080364;168.006783;289.072516;125.025135;183.029767	level3	9.8105e+07
(E)-4-oxooctadeca-2,17-dienoic acid	0.92667	C18H30O3	293.212	514.481	1.19033	neg	[M-H]-	293.210453;195.139584;275.19987;223.135454;224.143026	level3	9.76689e+07
(5R,8Z,11Z)-5-beta-D-glucopyranosyloxy-6-oxotetradeca-8,11-dienoic acid	0.749455	C20H32O9	415.197	158.458	0.0346427	neg	[M-H]-	89.024346;59.013705;137.024868;71.013545;415.197477	level3	9.74244e+07
Isoliquiritin	0.770764	C21H22O9	417.118	176.34	0.0148646	neg	[M-H]-	255.066428;417.122225;148.017615;337.173516;135.0085	level2	9.72309e+07
Tlatlancuayin	0.700917	C18H14O6	325.071	354.628	2.74193	neg	[M-H]-	325.071246;219.028749;202.999092;231.02801;177.018512	level3	9.71782e+07
Gerambullin	0.606356	C22H31NO4S	406.202	126.776	12.2417	pos	[M+H]+	227.125222;181.086071;209.114918;178.099201;194.092947	level3	9.67701e+07
mariline A2	0.69856	C33H43NO5	534.317	425.7	0.556979	pos	[M+H]+	184.073603;534.310547;104.106659;86.096126;124.999851	level3	9.66322e+07
meliasenin D	0.922389	C30H44O6	499.305	438.832	2.38535	neg	[M-H]-	499.301868;407.290571;451.286418;55.479264;453.297634	level3	9.63618e+07
Lappaconitine hydrobromide	0.771042	C32H44N2O8.HBr	585.323	87.462	2.06077	pos	[M+H]+	585.325545;70.065214;183.148145;150.05367;268.16725	level2	9.62205e+07
5,7-dihydroxy-2-(4-hydroxy-3-methoxyphenyl)-2,3-dihydrochromen-4-one	0.854668	C16H14O6	303.076	33.2691	28.7668	pos	[M+H]+	303.086316;151.037872;123.043771;147.043861;139.037736	level2	9.41886e+07
7-Me,4',5'-methylene ether-2',4',5',7-Tetrahydroxyflavan|7-methoxy-2'-hydroxy-4',5'-methylenedioxyflavan	0.708857	C17H16O5	301.107	250.657	3.08388	pos	[M+H]+	107.049019;195.064044;301.107505;153.054289;177.054108	level3	9.41777e+07
7-beta-D-glucopyranosylcoumarin|skimmin	0.795856	C15H16O7	309.096	185.979	0.739354	pos	[M+H]+	147.044092;291.193232;309.207132;81.069391;273.185475	level3	9.29986e+07
(2E,4E)-cyclo-[(NMe-L-Ala)-(NMe-L-Val)-(Nalpha-7-hydroxy-6-oxoocta-2,4-dienoyl-L-Orn)]|sclerotiotide G	0.819798	C23H36N4O6	463.255	231.058	0.0813246	neg	[M-H]-	417.24625;183.139765;463.219629;301.072109;59.013662	level3	9.19268e+07
1-octyl alpha-D-arabinofuranosyl-(1->6)-beta-D-glucopyranoside	0.962823	C19H36O10	423.224	216.756	1.78765	neg	[M-H]-	423.221914;291.178453;101.02485;71.01377;59.013752	level3	9.18538e+07
(+)-4-(3,4-dihydroxy-1-butenyl)-3,5,5-trimethyl-2-cyclohexenone|9,10-dihydroxy-4,7-megastigmadien-3-one	0.763454	C13H20O3	225.148	61.3044	1.90575	pos	[M+H]+	149.096257;121.101273;189.127436;137.096501;99.043857	level3	9.18521e+07
beta-D-Glucopyranoside, (1R,2S,4R,5R)-5-hydroxy-1,7,7-trimethylbicyclo[2.2.1]hept-2-yl 6-O-[(2R,3R,4R)-tetrahydro-3,4-dihydroxy-4-(hydroxymethyl)-2-furanyl]-	0.708879	C21H36O11	482.259	149	1.73889	pos	[M+NH4]+	153.126825;135.116388;97.028342;81.069223;115.038223	level2	9.15312e+07
Evernic acid	0.630541	C17H16O7	333.096	112.565	1.49553	pos	[M+H]+	123.043771;165.055004;151.037903;211.059003;169.048196	level3	9.12779e+07
Pyridoxine O-glucoside	0.869099	C14H21NO8	332.133	33.1539	0.913737	pos	[M+H]+	332.132779;108.079999;152.07015;314.119834;136.074926	level3	9.1253e+07
Astringin	0.607279	C20H22O9	407.133	190.303	0.000130675	pos	[M+H]+	107.049023;147.043946;407.163871;371.112278;261.124476	level2	9.05914e+07
6-alpha-L-rhamnosyl,8-O-acetylshanzhiside methyl ester	0.776096	C26H40O15	591.23	107.274	2.38542	neg	[M-H]-	429.175786;531.200542;591.239645;205.122234;187.111731	level3	9.04788e+07
6Z-8-Hydroxygeraniol 8-O-glucoside	0.775269	C16H28O7	333.19	82.4569	0.0885495	pos	[M+H]+	153.126428;113.096156;85.028241;171.137851;127.110909	level3	9.0392e+07
(4E,6E)-2,4,6-trimethylocta-4,6-dien-3-one	0.78032	C11H18O	165.128	286.675	2.27097	neg	[M-H]-	165.127928;111.081885;57.034375;83.050275;71.050455	level3	9.03473e+07
talaperoxide C	0.999283	C14H20O4	253.143	64.3037	1.51063	pos	[M+H]+	217.122441;121.064146;254.116437;235.132733;199.111179	level3	9.03163e+07
HEXADECA-7,10-DIENOIC ACID	0.85057	C16H28O2	253.215	322.601	3.34256	pos	[M+H]+	69.070006;83.085245;253.215686;95.084976;81.069284	level3	8.91951e+07
AGN-PC-073Z7I	0.77733	C15H14O6	289.071	136.238	1.44386	neg	[M-H]-	167.033977;289.072579;125.023883;123.044478;271.061238	level3	8.90653e+07
Azuleno(5,6-c)furan-1(3H)-one, 4,4a,5,6,7,7a,8,9-octahydro-3,4,8-trihydroxy-6,6,8-trimethyl-	0.867262	C15H22O5	283.154	200.529	1.68278	pos	[M+H]+	227.129246;163.112449;283.151273;135.116111;95.085742	level2	8.88747e+07
virgaurol C	0.943795	C30H42O6	499.304	446.088	0.760211	pos	[M+H]+	499.307246;481.289568;453.297969;435.28467;463.282716	level3	8.85778e+07
5-Methoxy-(3'',4''-dihydro-3'',4''-diacetoxy)-2'',2''-dimethylpyrano-(7,8:5'',6'')-flavone	0.962744	C25H24O8	451.136	57.4079	2.63622	neg	[M-H]-	451.13651;80.965619;79.957339;59.013756;71.013791	level3	8.83998e+07
7-O-methylkoninginin D	0.693198	C17H28O5	311.186	380.079	1.02327	neg	[M-H]-	267.197603;311.182605;293.174364;275.166383;249.185691	level3	8.81463e+07
1,7-bis(4-hydroxyphenyl)heptan-3-one	0.986246	C19H22O3	297.153	539.529	0.794888	neg	[M-H]-	297.154166;183.012159;134.894354;260.971022;298.158726	level2	8.66073e+07
7-hydroxy-1,7-bis(4-hydroxy-3-methoxyphenyl)hept-1-ene-3,5-dione	0.903372	C21H22O7	387.143	254.693	0.412305	pos	[M+H]+	137.059812;387.145564;191.068244;151.037767;181.048031	level3	8.62764e+07
(2'E)-1-hydroxy-2-(3',7'-dimethylocta-2',6'-dienyl)-4-methoxy-6-methylbenzene|1-hydroxy-2-(3',7'-dimethyl-octa-2',6'-dienyl)-4-methoxy-6-methyl-benzene|2-[(2'E)-3',7'-dimethyl-2',6'-octadienyl]-4-methoxy-6-methylphenol	0.867135	C18H26O2	275.2	537.08	0.264638	pos	[M+H]+	275.202001;149.096296;107.049093;105.06955;133.101415	level3	8.60346e+07
1,2-Di-O-palmitoyl-3-O-(6-sulfoquinovopyranosyl)glycerol	1	C41H78O12S	795.534	806.504	2.15344	pos	[M+H]+	85.076219;796.549989;184.073293;796.496025;86.079392	level2	8.59655e+07
(2alpha,3beta,19alpha)-2,3,19-trihydroxy-24-norolean-12-en-28-oic acid	0.679408	C29H46O5	473.328	405.827	2.23326	neg	[M-H]-	473.329253;455.317554;123.081653;311.223255;441.339287	level3	8.5828e+07
Sporovexin C	0.817461	C15H19NO6	310.128	40.2865	1.11956	pos	[M+H]+	310.128992;292.120026;264.123316;120.08087;132.080751	level3	8.57462e+07
(2E,4E)-5-[(3S)-5-acetyl-8-(beta-D-glucopyranosyloxy)-3,4-dihydro-6-hydroxy-1-oxo-1H-2-benzopyran-3-yl]penta-2,4-dienal|(3S,11E,13E)-5-acetyl-8-(beta-D-glucopyranosyloxy)-6-hydroxy-3-(oxopentadienyl)isochroman-1-one	0.862056	C22H24O11	463.123	231.62	1.28416	neg	[M-H]-	301.072309;463.124001;195.028675;417.245911;153.019364	level3	8.57382e+07
Sophorotriose	0.916545	C18H32O16	503.158	131.88	1.45584	neg	[M-H]-	503.153787;161.024195;323.075379;179.035077;101.024703	level3	8.54741e+07
(4S,4aS,8aS)-8a-methyl-5-methylene-4-(1-methylvinyl)-1,2,3,4,4a,5,6,8a-octahydro-naphthalene|(5S,6S,10S)-gorgona-1,4(15),11-triene	0.998528	C15H22	203.179	216.992	0.0240997	pos	[M+H]+	203.179414;147.116975;133.101442;204.085943;119.085755	level3	8.53381e+07
2,5-Dihydroxyterephthalic acid	0.795861	C8H6O6	197.009	37.787	0.769627	neg	[M-H]-	153.01926;109.029701;197.008136;151.003785;83.013943	level3	8.44723e+07
14, 15-Di-Ac-8, 13-Epoxy-11, 14, 15-labdnetriol	0.686897	C24H40O6	425.289	575.695	0.0284888	pos	[M+H]+	261.220094;69.033353;129.054076;81.069886;67.054271	level3	8.39186e+07
Dehydrocorydaline	0.998964	C22H24NO4+	366.17	222.87	1.89855	pos	[M+]	366.168553;350.138292;351.14727;322.141954;336.120056	level2	8.3056e+07
(1beta,6alpha)-1,6,14-trihydroxyeudesm-3-en-12-oic acid gamma-lactone|rel-(3R,3aR,5aS,6S,9aR,9bR)-3a,4,5,5a,6,7,9a,9b-octahydro-6-hydroxy-9-(hydroxymethyl)-3,5a-dimethylnaphtho[1,2-b]furan-2(3H)-one	0.887085	C15H22O4	267.159	259.671	2.49288	pos	[M+H]+	267.157859;81.069252;147.116765;123.115905;165.126412	level3	8.27313e+07
1,2-DIETHYLBENZENE	0.971877	C10H14	135.116	61.4301	3.41017	pos	[M+H]+	135.116261;107.084866;93.069783;91.053412;79.053983	level3	8.26837e+07
Corchorifatty acid A	0.92053	C18H28O4	309.205	306.949	0.477065	pos	[M+H]+	273.185018;291.192892;119.085454;161.095952;263.20241	level2	8.25158e+07
Malyngamide N	0.763111	C26H40ClNO4	464.259	209.613	1.59126	neg	[M-H]-	464.214324;418.251557;184.141025;183.137432;59.013828	level3	8.23994e+07
14-hydroxy-13-methoxy-8,11,13-podocarpatrien-7-one	0.942649	C18H24O3	289.179	390.035	1.64113	pos	[M+H]+	289.176218;159.080861;271.170128;57.03336;233.154683	level3	8.23877e+07
Lysionotin	0.843008	C18H16O7	367.078	56.6563	0.342906	pos	[M+Na]+	367.078843;147.044026;231.028604;349.134507;136.075297	level2	8.22997e+07
2,3-di-0-hexanoyl-alpha-glucopyranose	0.940116	C18H32O8	375.203	226.486	1.44086	neg	[M-H]-	375.204418;59.013722;89.024401;71.013722;101.024773	level3	8.22919e+07
Dactylenol	0.937375	C15H24O	221.189	260.462	1.06615	pos	[M+H]+	135.116154;221.188202;203.17913;107.084724;81.069935	level3	8.22868e+07
N-Benzoyl-L-phenylalaninol	0.806351	C16H17NO2	256.132	244.075	2.23743	pos	[M+H]+	105.033299;117.069879;256.132661;134.096547;91.054489	level3	8.21941e+07
Benzoic acid + 2O, O-Hex	0.910359	C13H16O9	315.072	35.7902	1.52112	neg	[M-H]-	153.019439;315.073056;152.011222;109.029883;108.021718	level2	8.1974e+07
Protocatechualdehyde	0.899131	C7H6O3	137.024	49.6896	0.94873	neg	[M-H]-	137.023276;93.03443;136.016126;109.029763;94.03012	level2	8.11175e+07
Feruloyl putrescine	0.940805	C14H20N2O3	265.153	39.7513	2.0164	pos	[M+H]+	177.05387;265.156202;145.027414;248.129067;72.080593	level2	8.08707e+07
Wilforic acid B	0.616817	C29H44O4	457.329	429.893	2.30443	pos	[M+H]+	413.305541;107.084568;457.332956;123.079697;439.322692	level3	8.0845e+07
afzelechin-(4alpha->8)-catechin-3-O-beta-glucopyranoside	0.770524	C36H36O16	723.194	220.544	0.992128	neg	[M-H]-	723.2012;435.108232;561.140232;125.023874;167.03416	level3	8.04624e+07
7beta-(1S,5-dimethyl-4-hexenyl)-3'aalpha,5',6',7',8',8'a,9',9'aalpha-octahydro-5,5'beta,8'abeta-trimethylspiro(bicyclo[2.2.2]oct-5-en-2,3'(2'H)-naphtho[2,3-b]furan)-2'-on|7beta-(1S,5-dimethyl-4-hexenyl)-3'aalpha,5',6',7',8',8'a,9',9'aalpha-octahydro-5,5'beta,8'abeta-trimethylspiro<bicyclo<2.2.2>oct-5-en-2,3'(2'H)-naphtho<2,3-b>furan>-2'-on	0.76871	C30H44O2	437.34	548.14	0.0680775	pos	[M+H]+	437.340927;95.084914;201.164077;109.101291;119.085446	level3	8.04321e+07
Citric acid	0.993207	C6H8O7	191.02	44.0489	1.74637	neg	[M-H]-	111.00892;87.008893;191.018714;85.028933;57.034455	level2	7.9759e+07
2,2,6,7-Tetramethylbicyclo[4.3.0]nona-1(9),4-dien-8-one	0.931069	C13H18O	191.143	220.841	2.46839	pos	[M+H]+	191.141397;163.147775;107.08495;121.101297;173.130508	level3	7.94247e+07
N-Nitroso-pyrrolidine	0.674554	C4H8N2O	101.071	900.391	3.89678	pos	[M+H]+	59.060034;101.071159;60.044037;43.017897;42.033725	level2	7.93898e+07
Citramalic acid	0.960567	C5H8O5	147.03	32.8649	2.68699	neg	[M-H]-	87.008836;147.030766;85.029771;129.019651;57.034379	level2	7.91551e+07
(1S,4aR,6aS,6bR,9R,10R,11R,12aR,14bS)-1,10,11-trihydroxy-9-(hydroxymethyl)-2,2,6a,6b,9,12a-hexamethyl-1,3,4,5,6,6a,7,8,8a,10,11,12,13,14b-tetradecahydropicene-4a-carboxylic acid	0.987394	C30H48O6	503.328	430.133	19.2218	neg	[M-H]-	503.343366;441.340462;485.327818;55.926864;411.325236	level2	7.88537e+07
Tetrahydropentoxyline	0.641009	C17H22N2O7	367.149	37.3463	1.20851	pos	[M+H]+	349.136258;229.097677;188.070131;332.112262;146.059704	level2	7.84787e+07
Cascaroside	0.734429	C27H32O14	579.172	99.168	0.259343	neg	[M-H]-	579.17657;417.124311;273.074384;167.036135;125.025093	level3	7.81993e+07
6-[2-(4,6-Dimethoxy-benzo[1,3]dioxol-5-yl)-ethyl]-4-methoxy-pyran-2-one	0.924442	C17H18O7	335.109	36.4796	0.0980244	pos	[M+H]+	335.10966;317.111746;173.080967;153.01776;85.028498	level3	7.80678e+07
3,4-Dihydroxybenzaldehyde	0.913996	C7H6O3	139.038	47.1673	3.0558	pos	[M+H]+	139.03777;111.043152;95.049308;93.033182;43.017635	level2	7.79193e+07
5-O-(beta-D-glucopyranosyl)-6'-O-benzoyl-2,5-dihydroxybenzoic acid|shomaside F	0.708511	C20H20O10	419.098	208.31	0.198485	neg	[M-H]-	419.092473;153.019302;273.07525;109.029695;167.03387	level3	7.7813e+07
4-Allyltoluene	0.99717	C10H12	133.101	145.021	1.48909	pos	[M+H]+	133.101293;105.06946;134.104333;91.054478;55.017938	level3	7.76929e+07
3-Hydroxybenzaldehyde	0.999998	C7H6O2	121.029	69.7331	2.7932	neg	M-H	121.029758;120.02125;122.03318;92.026871;93.034416	level1	7.74559e+07
1alpha-O-(beta-D-glucopyranosyl)enmenol|1alpha-O-beta-D-glucopyranosylenmenol|ent-7beta,20-epoxykaur-16-ene-1beta,6alpha,7alpha,14alpha,15alpha-pentanol 1-O-beta-D-glucopyranoside	1	C26H40O11	527.251	132.111	3.07777	neg	[M-H]-	89.024452;528.257069;59.013724;179.056428;71.013618	level3	7.70113e+07
6-O-Syringoylajugol	0.968546	C24H32O13	527.179	181.438	1.75605	neg	[M-H]-	527.185783;80.964746;225.007965;164.9854;94.980451	level3	7.681e+07
(E)-3-[4-[(2S,3R,4S,5S,6R)-3,4,5-trihydroxy-6-(hydroxymethyl)oxan-2-yl]oxyphenyl]prop-2-enoic acid	0.885077	C15H18O8	365.062	42.852	0.874313	pos	[M+K]+	365.061169;347.169656;203.032152;185.04117;366.118229	level2	7.67402e+07
1,3-Dihydroxy-2,4,5,7-tetramethoxy-9H-xanthene-9-one	0.70156	C17H16O8	349.089	37.984	1.15229	pos	[M+H]+	349.087374;313.067277;271.058037;253.047123;317.115548	level3	7.65931e+07
Cneorum-Chromon-H	0.926141	C20H24O3	311.168	601.595	0.148641	neg	[M-H]-	311.169524;183.012331;312.172248;198.034444;170.00405	level3	7.6466e+07
Digilanidobiose|O4-beta-D-glucopyranosyl-D-ribo-2,6-dideoxy-hexose|O4-beta-D-Glucopyranosyl-D-ribo-2,6-didesoxy-hexose	0.885469	C12H22O9	309.119	34.243	0.0987891	neg	[M-H]-	309.117634;59.013726;89.024423;71.013729;101.024811	level3	7.64478e+07
2',4',6'-Trihydroxyacetophenone	0.959661	C8H8O4	167.035	110.936	0.0392892	neg	[M-H]-	167.033995;123.045834;83.013912;125.023763;81.034775	level2	7.60904e+07
Procyanidin B2	0.961889	C30H26O12	577.134	41.7694	0.391269	neg	[M-H]-	125.024024;407.076026;289.074273;425.0906;577.140643	level2	7.60811e+07
trans-3beta-Caffeoyloxy-2alpha-hydroxyurs-12-en-28-oic acid	0.686654	C39H54O7	635.391	627.58	1.41177	pos	[M+H]+	163.03932;437.339126;203.178674;201.164553;181.048169	level3	7.60762e+07
Asperoside	0.816323	C31H48O9	563.324	367.711	3.25623	neg	[M-H]-	519.327962;273.075499;167.033961;565.295297;116.927716	level3	7.59499e+07
12-oxooctadeca-9,13,15-trienoic acid	0.860157	C18H28O3	293.21	438.374	0.705277	pos	[M+H]+	293.21232;275.201091;81.069912;95.084664;93.069885	level3	7.50989e+07
Leueantine D	0.745428	C33H45NO7	568.324	162.108	0.994739	pos	[M+H]+	184.07368;104.106709;550.315858;86.096175;532.300489	level3	7.47729e+07
Cimigenol	0.938321	C30H48O5	471.345	452.795	2.71575	pos	M+H-H2O	471.352014;203.179126;425.343363;187.147667;201.163747	level1	7.45833e+07
Kynurenic Acid	0.994718	C10H7NO3	190.049	42.0189	0.238076	pos	M+H	162.055222;190.048693;144.043033;81.033454;163.057674	level1	7.45805e+07
14-cis-cinnamoylnudicaulidine	0.69814	C33H45NO7	568.323	236.645	0.305781	pos	[M+H]+	184.07369;568.317365;104.106682;86.09615;550.315533	level3	7.39683e+07
Monobutyl phthalate	0.840201	C12H14O4	205.085	595.594	0.352142	pos	M+H-H2O	149.021985;57.069599;121.027715;205.122912;150.027064	level1	7.38641e+07
Lactiflorin	0.995655	C23H26O10	463.156	63.2996	0.658818	pos	[M+H]+	463.151577;301.057597;299.054971;464.15735;300.05744	level3	7.3807e+07
(2S,3R,4R,5R,6S)-2-[(2R,3R,4S,5R,6R)-2-[2-(3,4-dihydroxyphenyl)ethoxy]-3,5-dihydroxy-6-(hydroxymethyl)oxan-4-yl]oxy-6-methyloxane-3,4,5-triol	0.756477	C20H30O12	461.165	57.3933	2.61594	neg	[M-H]-	415.156896;269.100377;101.024834;161.046053;71.013728	level2	7.35691e+07
Methyl oropheate	0.784776	C19H24O2	285.185	189.549	2.22582	pos	[M+H]+	285.186651;147.11586;81.069795;123.116774;173.132183	level3	7.33218e+07
Dihydrokaempferol	0.950801	C15H12O6	287.056	133.423	0.689211	neg	[M-H]-	125.025091;259.058516;96.960435;287.053908;243.06472	level2	7.29454e+07
29-norlupan-3,20-dione|29-norlupane-3,20-dione|30-Nor-lupandion-(3.20)|30-nor-lupanedione-(3.20)	0.689545	C29H46O2	427.355	572.736	1.59199	pos	[M+H]+	427.360652;203.178999;95.085878;109.101044;205.157222	level3	7.2714e+07
3beta,11alpha,12,21beta-tetrahydroxy-22-oxo-urs-12-en-24-oic acid|camellisin A	0.855551	C30H46O7	517.317	336.866	0.862102	neg	[M-H]-	517.316657;455.316494;499.300554;57.480496;407.300127	level3	7.21701e+07
Methyl 3,4,5-trimethoxycinnamate	0.839327	C13H16O5	275.09	410.532	1.83627	pos	[M+Na]+	107.049047;169.04848;274.273378;275.27907;88.075157	level2	7.19722e+07
Ciryneol B	0.827422	C18H28O3	293.21	342.214	0.601622	pos	[M+H]+	293.207989;275.201948;95.048249;81.06928;67.053998	level3	7.17529e+07
Stearidonic acid	0.934407	C18H28O2	277.215	578.904	0.779525	pos	[M+H]+	277.213208;93.069862;79.05403;107.084953;81.069278	level2	7.17148e+07
Chlorogenic acid	0.754671	C16H18O9	355.101	40.0451	0.517317	pos	[M+H]+	163.037704;193.048922;145.027476;135.042887;355.165784	level2	7.16178e+07
2,4-tetradecadienoic acid isobutyl amide	0.831881	C18H33NO	280.262	599.336	2.49263	pos	[M+H]+	280.264001;69.069892;95.08597;299.058859;81.069921	level3	7.1553e+07
Scortechinone L	1	C34H42O7	561.291	409.459	0.343137	neg	[M-H]-	517.317936;563.280927;145.029047;385.250794;71.01361	level3	7.1514e+07
spiromentins I/J	0.659691	C30H26O10	545.149	44.5853	1.65096	neg	[M-H]-	145.014637;545.076836;127.002998;220.978727;204.946322	level3	7.148e+07
Vanillin	0.966473	C8H8O3	153.054	92.7119	1.78056	pos	[M+H]+	153.054053;125.058599;93.033228;111.043199;65.038252	level2	7.12733e+07
(3R)-hydrangenol 8,4'-di-O-beta-D-glucopyranoside	0.757142	C27H32O14	579.169	75.7548	3.28715	neg	[M-H]-	579.176561;417.113505;327.086086;273.075545;389.119141	level3	7.09514e+07
cucubalugenin A	0.682356	C30H46O7	517.316	391.445	0.890739	neg	[M-H]-	517.316825;455.317247;473.327417;439.286867;57.480495	level3	7.06458e+07
28-norolean-11,13(18),17(22)-triene-3,21-dione	0.754033	C29H40O2	421.309	429.893	0.204263	pos	[M+H]+	421.307515;187.147935;119.085559;145.100877;201.164078	level3	7.04032e+07
(Z)-3,11,14-trihydroxyoctadec-9-en-12-ynoic acid|gallicynoic acid E	0.727764	C18H30O5	325.201	368.222	2.20618	neg	[M-H]-	325.204782;201.113256;307.188795;209.11848;185.118727	level3	7.0133e+07
Germacrone	0.977568	C15H22O	219.173	169.438	2.67337	pos	[M+H]+	219.172877;201.165236;133.101344;145.100952;95.084955	level2	7.01216e+07
Quercetin-3-O-xyloside	0.685792	C20H18O11	435.091	120.88	0.722823	pos	[M+H]+	303.048358;123.043771;165.054996;357.098606;255.112272	level2	7.00933e+07
jioglutoside B	0.61533	C23H34O13	517.193	160.896	1.45812	neg	[M-H]-	59.013653;307.105332;101.024749;163.061708;125.025034	level3	7.00059e+07
4-methoxybenzene-1,3-diol	0.925865	C7H8O3	141.054	52.092	1.02944	pos	[M+H]+	141.054672;126.031008;43.017643;95.049324;142.058451	level3	6.98284e+07
4,7-Dihydroxy-3,7-dimethyl-2,8-nonadienoic acid 1,4-lactone	0.8989	C11H16O3	197.117	62.5388	1.37464	pos	[M+H]+	197.116127;179.107135;151.037439;135.116019;133.100982	level3	6.94438e+07
Ginkgolide C	0.690525	C20H24O11	457.135	82.2605	0.435717	neg	M-H+H2O	125.023919;295.079257;457.132683;167.034188;179.034735	level1	6.84824e+07
Convolvulanic acid B	0.893971	C11H10O5	223.059	43.7545	1.85977	pos	[M+H]+	223.059956;205.048463;177.054034;163.037656;97.028235	level3	6.75163e+07
3,5-dihydro-3alpha-hydroxy-ML-236C	0.874619	C18H28O4	309.205	359.382	0.0962394	pos	[M+H]+	291.192683;273.18528;81.069967;57.033216;119.085588	level3	6.73253e+07
Euscaphic acid	0.989006	C30H48O5	487.342	424.478	0.733646	neg	M-H	487.34854;111.008841;488.344435;54.149672;87.008862	level1	6.69115e+07
Ilexgenin A	0.910499	C30H46O6	501.323	356.7	1.28569	neg	M-H	501.31672;457.329574;359.255054;371.259299;55.703147	level1	6.68541e+07
chrysin-6-C-fucopyranoside	0.791439	C21H20O8	399.109	258.259	1.82949	neg	[M-H]-	399.109461;293.065939;237.114269;205.049162;233.047303	level3	6.68468e+07
Salsoline	0.991045	C11H15NO2	194.117	438.25	0.16944	pos	[M+H]+	194.115933;135.042953;195.086931;58.065107;138.065092	level2	6.67622e+07
DTXSID20942731	0.902206	C15H14O4	257.082	234.893	0.492892	neg	[M-H]-	257.083289;213.090763;239.070734;81.034807;173.060399	level3	6.65216e+07
Usutalic imide	0.998938	C19H13NO4	320.091	177.757	0.825501	pos	[M+H]+	320.090575;292.096104;321.096147;318.072393;290.081317	level3	6.57827e+07
Noreugenin	0.98102	C10H8O4	193.049	71.42	0.510587	pos	M+H	193.049074;133.101415;147.116362;105.069371;175.110696	level1	6.56416e+07
2-methylpropanyl 6-O-beta-D-apiofuranosyl-beta-D-glucopyranoside	0.882139	C15H28O10	367.161	40.3917	2.49015	neg	[M-H]-	367.163208;235.119043;101.02484;71.013729;59.013745	level3	6.55965e+07
CHEMBL4096402	1	C16H14N2O2	267.113	69.051	2.04024	pos	[M+H]+	267.110817;268.113002;89.059559;133.084648;249.101106	level3	6.55731e+07
everlastoside D	0.790322	C17H30O10	393.176	84.9158	1.06861	neg	[M-H]-	89.024257;59.013659;149.044913;71.013638;101.024768	level3	6.54813e+07
(+)-lariciresinol-4-O-beta-D-glucopyranoside|(-)-lariciresinol-4-O-beta-D-glucopyranoside|7S,8R,8'R-(-)-lariciresinol-4'-O-beta-D-glucopyranoside|lariciresinol 4'-O-beta-D-glucopyranoside	0.919278	C26H34O11	521.203	86.3195	2.39998	neg	[M-H]-	521.207733;359.149303;59.01373;344.124787;101.023624	level3	6.49819e+07
Senedigitalene	0.950305	C14H22	191.179	701.294	0.229465	pos	[M+H]+	191.178452;121.101278;135.116393;95.08457;192.124374	level3	6.47803e+07
Notoginsenoside R7	0.884534	C36H62O8	621.436	830.393	0.240412	neg	[M-H]-	621.443467;89.024573;440.77258	level3	6.47726e+07
Sinapic acid	0.856698	C11H12O5	207.064	103.629	2.53679	pos	M+H-H2O	207.064921;175.038812;119.048566;147.044266;91.05368	level1	6.44442e+07
SCHEMBL8658984	0.867272	C12H18O2	195.137	312.568	0.576069	pos	[M+H]+	195.086779;81.069334;67.053853;93.069939;135.11652	level3	6.43976e+07
3-O-<beta-D-2-O-sulphonylquinovopyranosyl>-quinovic acid|zygophyloside D	1	C36H56O12S	711.338	511.974	1.27102	neg	[M-H]-	649.383452;712.330812;161.0236;167.036134;125.024984	level3	6.39184e+07
(3E)-4-[(4R)-4-(beta-D-glucopyranosyloxy)-2,6,6-trimethyl-cyclohex-1-enyl]but-3-en-2-one|(3E)-4-[(4R)-4-(beta-D-glucopyranosyloxy)-2,6,6-trimethylcyclohex-1-enyl]but-3-en-2-one|3-hydroxymegastigmasta-5,7-dien-9-one-3-O-beta-D-glucopyranoside|3beta-D-glucopyranosyloxy-beta-ionone	0.776152	C19H30O7	371.205	136.338	1.31564	pos	[M+H]+	209.151321;165.126475;85.028429;191.14142;151.111498	level3	6.3881e+07
Methyl dihydrojasmonate	0.66905	C13H22O3	227.164	119.106	3.1853	pos	[M+H]+	227.162254;169.084783;95.049046;153.090049;107.084523	level3	6.35179e+07
13-methyl-6,7,8,9,11,12,14,15,16,17-decahydrocyclopenta[a]phenanthrene-3,17-diol	0.982937	C18H24O2	273.184	370.011	0.735252	pos	[M+H]+	273.185826;145.100883;131.085904;274.081713;147.079815	level3	6.32661e+07
Pseudolarolide D	0.756006	C30H44O5	485.325	457.964	0.150114	pos	[M+H]+	441.296214;485.325182;123.079502;467.319949;187.147697	level3	6.31184e+07
Icariside F2	0.774063	C18H26O10	401.145	51.3427	0.452688	neg	[M-H]-	269.10539;401.145353;101.024645;71.01361;161.045756	level3	6.29759e+07
Dianellinone	0.628199	C26H18O8	457.091	417.28	1.24476	neg	[M-H]-	457.094447;213.019877;442.06376;427.041296;355.05953	level3	6.28253e+07
3-O-beta-D-Galactopyranosylproanthocyanidin A5'	0.628888	C36H34O17	739.184	221.64	0.608309	pos	[M+H]+	181.048308;577.135054;123.043935;397.089542;153.054122	level2	6.24477e+07
5,7-dihydroxy-3-(4-hydroxyphenyl)-6,8-bis[3,4,5-trihydroxy-6-(hydroxymethyl)oxan-2-yl]chromen-4-one	0.725162	C27H30O15	595.164	117.463	1.28163	pos	[M+H]+	303.047729;85.028231;449.109353;71.048761;345.058818	level2	6.22955e+07
2(S)-5,7-dihydroxy-5'-methoxy-[2'',2''-(3''-hydroxy)-dimethylpyrano]-(5'',6'':3',4')flavanone	0.892158	C21H22O7	387.143	167.671	0.90108	pos	[M+H]+	137.059872;387.145973;167.068789;181.04806;357.130366	level3	6.19489e+07
6,7-dimethoxy-2H-chromen-2-one	0.903025	C11H10O4	229.049	297.862	0.56308	pos	[M+Na]+	229.047443;183.043682;155.04803;201.054555;186.03128	level2	6.19106e+07
β-Ionone	0.987953	C13H20O	175.148	317.656	1.24933	pos	M+H-H2O	175.146841;119.085673;133.101311;69.069916;105.069433	level1	6.17203e+07
isorhamnetin	0.999994	C16H12O7	317.065	122.121	0.723014	pos	[M+H]+	317.067165;302.044089;318.062692;81.069452;153.017491	level2	6.15681e+07
Quercetin 3,7-dimethyl ether	1	C17H14O7	331.078	35.1701	1.30523	pos	[M+H]+	331.081849;332.132868;152.069942;108.07993;153.017371	level2	6.13428e+07
21R,23R-epoxy-7alpha,24S,25-trihydroxy-21alpha-methoxyapotirucalla-1,14-dien-3-one|holstinone C	0.993229	C30H46O6	501.323	460.389	1.49471	neg	[M-H]-	501.316528;439.320896;423.295302;457.328911;55.703126	level3	6.11562e+07
ACMC-20mxpt	0.910539	C30H46O5	487.339	507.612	1.27257	pos	[M+H]+	335.255149;425.331841;471.333531;443.340804;489.192232	level3	6.09365e+07
p-Hydroxy-cinnamic acid	0.961092	C9H8O3	163.04	91.941	1.33865	neg	[M-H]-	119.050344;163.039069;59.013727;101.023705;91.054698	level2	6.05002e+07
Eremopetasinorol	0.913204	C13H20O2	209.153	149.503	0.383945	pos	[M+H]+	209.042464;191.141342;151.11152;107.084966;121.101227	level2	6.00929e+07
12:4+4O fatty acyl hexoside	0.866965	C18H28O10	403.161	87.8611	2.20471	neg	[M-H]-	223.096282;59.013766;179.10624;89.024526;71.013812	level3	5.95895e+07
6-(1-Ethoxyethyl)-7-methoxy-2,2-dimethyl-2H-1-benzopyran	0.894575	C16H22O3	263.163	318.822	0.262379	pos	[M+H]+	263.162411;161.096314;99.043791;133.101303;245.153141	level3	5.95391e+07
NICOTINATE	0.967397	C6H5NO2	124.039	41.9037	0.663588	pos	[M+H]+	124.039128;112.038497;140.034726;96.04364;125.058471	level2	5.94183e+07
Aromadendrin	0.724003	C15H12O6	287.061	55.0896	17.5925	neg	M-H	87.008867;151.003011;287.083376;135.04426;199.097083	level1	5.92486e+07
Isookanin-7-O-glucoside	0.853202	C21H22O11	449.108	92.8958	2.78986	neg	[M-H]-	287.055867;151.003678;269.043433;135.044396;449.104969	level2	5.90563e+07
PYROGALLOL	0.976037	C6H6O3	127.039	39.2521	3.48517	pos	[M+H]+	109.027442;127.038874;81.03329;53.038271;110.031723	level2	5.88627e+07
neoechinulin A	0.801216	C19H21N3O2	324.17	269.605	0.690624	pos	[M+H]+	256.108202;268.108994;324.170924;69.070084;255.098035	level2	5.87753e+07
6-Hydroxykaempferol 3,6-dimethyl ether 7-glucoside	0.838315	C23H24O12	491.118	163.158	0.523236	neg	[M-H]-	491.114879;152.011116;175.039588;315.073266;153.019307	level3	5.86616e+07
8-p-Hydroxybenzyldiosmetin	0.772324	C23H18O7	405.097	336.341	2.95506	neg	[M-H]-	405.099235;377.105266;299.057126;193.014208;271.060563	level3	5.85797e+07
Methylkauran-19-ol-17-oate	0.914845	C21H34O3	335.256	512.601	1.91066	pos	[M+H]+	335.256864;81.069871;95.08472;67.054243;93.069615	level3	5.84965e+07
4-Hydroxybenzoic acid	0.853406	C7H6O3	137.024	146.851	1.88393	neg	[M-H]-	93.034339;137.025008;94.037508;138.027811;109.029695	level2	5.83278e+07
pimelic acid	0.889163	C7H12O4	159.066	80.2513	0.158204	neg	[M-H]-	115.075984;159.06562;141.054682;97.066171;116.079622	level3	5.83141e+07
Psoracorylifol E	0.905038	C18H24O2	273.184	358.691	0.722607	pos	[M+H]+	273.185717;145.101114;131.084605;117.070247;147.080756	level3	5.82359e+07
1,4,5-Naphthalenetriol	0.867294	C10H8O3	177.054	163.095	1.65083	pos	[M+H]+	145.027495;177.054007;117.033264;149.058985;89.038105	level2	5.80117e+07
4-acetyloxy-3-methylbut-2-enoic acid	0.693253	C7H10O4	157.052	902.333	0.363694	neg	[M-H]-	157.052686;130.04052;115.029886;65.01456;157.90198	level3	5.75824e+07
Gaudichaudianic acid, (-rac)	0.947204	C22H28O3	339.199	735.542	0.00872393	neg	[M-H]-	339.197414;183.011963;340.205503;160.84288;184.0208	level3	5.72427e+07
Neryl arabinofuranosyl-glucoside	0.91942	C21H36O10	447.223	230.583	0.798714	neg	[M-H]-	447.220196;315.18098;101.024591;59.013682;71.013738	level3	5.65255e+07
Hexyl beta-sophoroside|Hexyl-??-D-glucopyranosyl-(1閳ユ◤鍌楀瀻 2)-??-D-glucopyranoside	0.929303	C18H34O11	425.203	100.608	1.90409	neg	[M-H]-	101.024857;425.203961;71.013763;59.013737;263.15017	level3	5.63045e+07
(2R,3S,4S,5R,6R)-5-[(2S,3R,4R)-3,4-dihydroxy-4-(hydroxymethyl)oxolan-2-yl]oxy-2-(hydroxymethyl)-6-(2-phenylethoxy)oxane-3,4-diol	0.882284	C19H28O10	455.139	254.954	12.6312	pos	[M+K]+	455.1338;147.044011;207.064937;189.055839;119.048565	level2	5.62997e+07
Coumaroyl Hexoside	0.838591	C15H18O8	325.092	43.4466	0.0461287	neg	[M-H]-	163.039205;119.050422;145.029267;325.094739;59.0139	level2	5.62185e+07
7,10,13-Hexadecatrienal	0.814001	C16H26O	235.205	322.601	0.949066	pos	[M+H]+	235.206327;217.196172;95.085776;81.069877;133.100931	level3	5.61968e+07
Miraxanthin III	0.736053	C17H18N2O5	331.128	54.7142	0.0109735	pos	[M+H]+	331.125083;313.118252;295.108299;277.095839;70.064988	level3	5.61605e+07
Phenethyl rutinoside	0.650607	C20H30O10	429.177	184.675	2.79311	neg	[M-H]-	59.013766;249.112233;205.123804;89.024573;429.177935	level3	5.60944e+07
graminone B	0.895111	C21H22O8	403.137	129.021	0.609372	pos	[M+H]+	403.140459;167.071034;153.053816;137.059679;181.04783	level3	5.60738e+07
14,15-dinor-ent-2,4(18)-clerodadien-13-one	0.829264	C18H28O	261.22	511.479	1.38668	pos	[M+H]+	261.220963;243.211062;121.101235;93.069912;135.116419	level3	5.59389e+07
cinnamrutinose A	0.679676	C21H30O10	441.176	97.008	0.119409	neg	[M-H]-	441.177852;59.013622;89.024304;71.013637;101.024726	level3	5.48387e+07
2-isoprenyl-5-isopropylphenyl 4-O-beta-D-xylopyranoside	0.645166	C19H28O6	353.195	180.232	0.569584	pos	[M+H]+	191.143864;123.117151;133.101001;81.06994;121.100848	level3	5.46993e+07
methyl (2Z,11Z,1'R,2'R)-2-(1',2'-dihydroxypropyl)tetradeca-2,11-dien-13-ynoate	0.841855	C18H28O4	309.206	189.862	0.793499	pos	[M+H]+	81.069947;309.204778;291.192879;109.064371;59.049147	level3	5.45964e+07
Daidzein	1	C15H10O4	255.064	351.903	0.981609	pos	[M+H]+	255.063582;256.068468;153.017793;195.136151;67.017576	level2	5.42247e+07
Quercetin 3-(6''-acetylglucoside)	0.935039	C23H22O13	507.112	136.958	0.961769	pos	[M+H]+	303.048359;85.028413;127.039103;304.051688;187.059056	level2	5.41873e+07
18α-Glycyrrhetinic acid	0.999987	C30H46O4	469.331	651.301	0.873543	neg	M-H	469.333827;52.1485;470.335844;423.326296;393.316134	level1	5.40078e+07
Kaempferol-3-O-rutinoside	0.749714	C27H30O15	593.15	41.2647	0.487588	neg	[M-H]-	239.057725;179.033853;177.055118;149.060584;107.049668	level2	5.38085e+07
Kaempferol 3-rhamnosyl-(1->3)(4'''-p-coumarylrhamnosyl)(1->6)-glucoside	0.623966	C42H46O21	885.245	160.543	1.20895	neg	[M-H]-	885.254543;273.075151;723.199922;167.033981;125.023781	level3	5.35985e+07
5,6,8-Trihydroxy-7,4'-dimethoxyflavone	0.774637	C17H14O7	329.066	224.582	0.0168109	neg	[M-H]-	329.068086;301.072291;195.028684;193.014239;299.057132	level3	5.34779e+07
3,4-Dihydroxyhydrocinnamic acid	0.90429	C9H10O4	181.05	45.7684	2.76071	neg	[M-H]-	59.013812;181.052095;137.060942;93.034219;121.029206	level2	5.32712e+07
naringenin	1	C15H12O5	273.075	101.372	1.04096	pos	[M+H]+	250.962819;274.076815;107.04909;256.069052;190.058038	level2	5.3052e+07
Uzarine	0.989735	C35H54O14	699.355	511.479	1.67423	pos	[M+H]+	699.361522;537.302273;700.361521;77.708113;538.306627	level3	5.30021e+07
Isorhamnetin-3-O-glucoside	0.986047	C22H22O12	479.117	126.6	0.27022	pos	M+H	317.067184;302.043956;85.028408;318.066042;285.036695	level1	5.27794e+07
Terrestric acid	0.901409	C11H14O4	211.096	100.869	1.43663	pos	[M+H]+	211.096232;165.055108;139.075302;167.068914;86.096284	level3	5.25715e+07
Sanguisorbin B	0.802215	C35H56O7	589.408	538.288	0.358214	pos	[M+H]+	589.408404;191.179421;439.3566;73.028083;203.179308	level2	5.13281e+07
Palmatine	0.999941	C21H22NO4+	352.154	197.337	0.0480919	pos	[M+]	352.152411;336.120394;337.128642;308.126109;322.107032	level2	5.10611e+07
Quercetin 3-(6''-ethylglucuronide)	0.6436	C23H22O13	505.099	97.6033	0.29973	neg	[M-H]-	145.029269;505.096338;125.02374;153.01936;307.080404	level3	5.10532e+07
Eupafolin	0.894996	C16H12O7	315.051	132.689	0.708865	neg	M-H	315.052384;243.02811;271.060242;227.070648;297.037533	level1	5.10231e+07
Medicarpin	0.933256	C16H14O4	271.096	294.14	0.518325	pos	[M+H]+	271.057612;165.069952;211.073581;183.079122;121.064304	level2	5.09615e+07
23,28-dihydroxylupan-12-ene-3beta-caffeate	0.999412	C39H56O6	619.396	664.957	5.39267	neg	[M-H]-	619.400745;161.024229;68.823426;620.402027;135.044789	level3	5.0664e+07
Mannitol	0.932762	C6H14O6	181.072	49.4291	2.28398	neg	[M-H]-	181.071446;59.013723;89.024337;71.013699;101.02468	level2	5.06347e+07
Allyl benzoate	0.955297	C10H10O2	163.075	568.081	1.07362	pos	[M+H]+	105.033324;163.075193;106.036435;121.04695;107.085031	level2	5.04648e+07
Desacylbaldrinal	0.80202	C10H8O3	177.054	106.504	2.10422	pos	[M+H]+	145.0275;177.054021;117.033262;149.05905;178.050221	level3	5.04521e+07
Elliptifoline	0.905957	C36H40N2O8	627.268	195.114	1.50167	neg	[M-H]-	627.264531;80.964772;225.007863;125.023733;69.697178	level3	5.03768e+07
Tyrosine	0.931987	C9H11NO3	182.081	34.9317	2.30093	pos	[M+H]+	136.075081;182.081436;165.054888;123.04355;119.048087	level2	5.00349e+07
6'-carboxy-2',6-dihydroxy-2-beta-glucopyranosyloxy-4'-hydroxymethyl-benzophenone|cassiaphenone A-2-glucoside	0.633268	C21H22O12	465.103	42.5301	0.723617	neg	[M-H]-	259.058988;465.104359;231.028112;303.051155;135.029558	level3	4.99657e+07
Mayurone	0.866181	C14H20O	205.158	572.962	0.600829	pos	[M+H]+	205.157178;121.100917;163.112151;175.149193;177.164597	level3	4.97597e+07
Maleic acid	0.993382	C4H4O4	115.004	48.123	3.16862	neg	[M-H]-	71.013626;115.003346;115.920417;59.013733;73.029419	level2	4.97165e+07
Dihydro-Jasmonic acid (dh-JA)	0.731117	C12H20O3	213.148	282.987	0.744631	pos	[M+H]+	81.069873;213.052928;67.054295;149.132737;113.096271	level3	4.96607e+07
18-HYDROXYOCTADECA-9,11,13-TRIENOIC ACID	0.968637	C18H30O3	293.212	496.945	1.21141	neg	[M-H]-	293.210329;275.199602;263.201397;249.186333;59.013558	level3	4.95071e+07
trans-Cinnamic acid	0.987201	C9H8O2	149.059	218.681	1.82558	pos	[M+H]+	131.048188;103.053851;149.0589;132.051425;104.056725	level2	4.95056e+07
4-hydroxy-6[4-hydroxystyryl]2-pyrone	0.682984	C13H10O4	231.065	76.6431	2.76856	pos	[M+H]+	153.017702;231.066423;105.033322;203.033237;232.068819	level3	4.94205e+07
1-(4''-hydroxyphenyl)-3-(3'-hydroxy-2',4'-dimethoxyphenyl)propene|dalparvinene	0.682977	C17H18O4	287.132	189.115	18.7677	pos	[M+H]+	287.127185;227.10459;255.102205;195.080169;163.074899	level3	4.93531e+07
Antiarone A	0.836613	C25H26O6	421.162	60.735	1.52566	neg	[M-H]-	421.160371;191.020716;111.008453;96.9692;87.008822	level3	4.92459e+07
Tashironin	0.864515	C22H26O6	387.179	392.975	0.474541	pos	[M+H]+	105.069494;119.048424;106.073449;387.184998;79.053903	level3	4.89704e+07
NSC116453	0.903697	C31H48O7	531.332	469.668	0.204231	neg	[M-H]-	531.3361;513.315777;409.311841;393.279285;59.03771	level3	4.89449e+07
(4-hydroxy-3,5-dimethoxyphenyl)[(3S,4R,5S)-tetrahydro-5-(4-hydroxy-3-methoxyphenyl)-4-(hydroxymethyl)furan-3-yl]methanone|wikstrone	0.748095	C21H24O8	405.153	166.215	0.417441	pos	[M+H]+	387.14425;181.050371;233.08112;167.070748;243.06438	level3	4.88111e+07
Oleanonic acid	0.960321	C30H46O3	455.347	650.802	9.01294	pos	[M+H]+	409.352452;205.157331;189.164207;437.342016;203.178715	level2	4.88034e+07
Graphisin A	0.829622	C16H14O8	333.061	239.608	0.983456	neg	[M-H]-	193.014187;333.058623;315.052372;151.003706;149.023551	level3	4.87835e+07
NSC 8125	0.641101	C12H20O4	229.143	244.932	0.0139329	pos	[M+H]+	229.143488;147.117331;165.127059;81.069506;119.084798	level3	4.86978e+07
(5S)-5-hydroxy-1-(4',5'-dihydroxy-3'-methoxyphenyl)-decan-3-one|5'-hydroxy-[6]-gingerol	0.996153	C17H26O5	309.174	589.76	1.30805	neg	[M-H]-	309.176419;96.959608;79.957439;122.975465;310.176366	level3	4.83002e+07
Hamachilobene A	1	C26H40O7	465.281	574.918	0.212102	pos	[M+H]+	423.285463;467.320057;123.079575;424.289856;421.307922	level3	4.82815e+07
Loliolide beta-D-glucopyranoside	0.875552	C17H26O8	359.169	63.097	0.45706	pos	[M+H]+	197.117187;179.104981;135.116448;107.085016;85.028413	level3	4.80998e+07
(E)-Dehydro-1,8-sesquicineole-12-yl propionate	0.800853	C18H28O3	293.21	376.147	0.433568	pos	[M+H]+	177.053628;293.213439;151.110816;95.085837;145.027052	level3	4.8047e+07
Cylindrol A	0.774105	C26H36O6	443.246	803.737	1.62914	neg	[M-H]-	359.156238;427.220448;443.248019;360.155709;159.08415	level3	4.79923e+07
Terpendole I	0.644309	C27H35NO5	454.254	198.214	3.86464	pos	[M+H]+	184.073554;104.106791;454.26171;86.096329;124.99968	level3	4.78632e+07
3-Phenyllactic acid	0.92839	C9H10O3	165.056	97.855	4.35803	neg	[M-H]-	147.045755;165.056581;119.050479;72.992861;103.055054	level2	4.76622e+07
8'-Episesaminone	0.803461	C20H18O7	369.098	170.999	2.12283	neg	[M-H]-	369.096196;179.033885;137.024924;221.04604;153.055377	level3	4.75826e+07
Neobonaspectin B	0.70036	C34H44O9	595.28	512.784	13.9718	neg	[M-H]-	152.996696;595.280871;277.216917;78.959356;317.063486	level3	4.74444e+07
1beta-1-Hydroxy-13-nor-6,9-eremophiladiene-8,11-dione|1beta-hydroxy-6,9-dien-8-oxoeremophil-11-nor-11-ketone	0.791647	C14H18O3	235.132	64.3037	1.07278	pos	[M+H]+	121.064433;217.123055;235.132829;81.06923;175.110604	level3	4.74029e+07
1-methoxy-(9R,10S)-epoxyheptadecan-4,6-diyn-3-one|1-methoxy-(9R,10S)-epoxyheptadecan-4,6-diyne-3-one	0.893551	C18H26O3	291.194	273.988	2.18766	pos	[M+H]+	291.193492;273.185534;259.059498;81.07004;95.085699	level3	4.72458e+07
(12S)-hydroxyeicosatetraenoic acid|(S)-12-Hydroxy-5,8,14-cis-10-trans-eicosatetraen-carbonsaeure-methylester|(S)-methyl (5Z,8Z,10E,14Z)-12-hydroxyeicosa-5,8,10,14-tetraenoate|12(S)-HETE methyl ester|methyl (5Z,8Z,10E,12S,14Z)-12-hydroxyeicosa-5,8,10,14-tetraenoate|methyl 12(S)-hydroxy-5(Z),8(Z),10(E),14(Z)-eicosatetraenoate|methyl 12S-hydroxyeicosa-5Z,8Z,10E,14Z-tetraenoate	0.907137	C21H34O3	335.258	494.342	2.40863	pos	[M+H]+	335.256953;67.05441;81.070035;95.084892;93.06978	level3	4.70472e+07
(3R)-5-carbomethoxymellein|(R)-(-)-5-methoxycarbonylmellein|5-carbomethoxy-3,4-dihydro-8-hydroxy-(3R)-methylisocoumarin|5-methoxycarbonylmellein	0.831103	C12H12O5	237.075	52.0268	1.47032	pos	[M+H]+	177.053906;237.07453;191.068215;219.06358;163.074965	level3	4.70014e+07
Kojic Acid	1	C6H6O4	143.033	44.4276	3.29014	pos	[M+H]+	143.033721;144.036671;125.023275;69.03345;43.017691	level2	4.69841e+07
SCHEMBL6634501	0.855077	C7H8O4	157.049	36.2572	0.81704	pos	[M+H]+	157.048694;70.065149;112.075576;142.024923;158.052378	level3	4.69526e+07
p-Mentha-1,3,5,8-tetraene	0.990638	C10H12	133.101	231.824	1.36587	pos	[M+H]+	133.101247;105.069445;91.053472;134.104053;131.08622	level2	4.6898e+07
YM-215343	0.635232	C24H29NO6	428.203	70.8133	0.174818	pos	[M+H]+	184.073201;104.106415;428.203444;86.095951;124.999564	level3	4.68822e+07
Icariside C3	0.870582	C21H38O8	417.248	214.157	1.80747	neg	[M-H]-	417.246153;71.013709;59.013727;255.066743;101.024796	level3	4.6853e+07
6-hexyl-3-methyl-(3S,3aS,6R,6aR)-perhydrofuro[3,4-b]furan-2,4-dione	0.90462	C13H20O4	239.129	324.087	1.56459	neg	[M-H]-	195.139789;239.128985;177.129121;196.14168;59.013729	level3	4.675e+07
(7S,8S,1'R)-Delta8'-3',5'-dimethoxy-3,4-methylenedioxy-1',4'-dihydro-4'-oxo-7.O.2',8.1'-neolignan	0.810458	C21H22O6	371.147	98.3407	3.33245	pos	[M+H]+	371.147205;95.048409;107.049271;217.085695;137.06042	level3	4.66518e+07
(2'S)-3-hydroxy-5-methoxyphenyl-2'-tridecanol	0.869559	C20H34O3	323.258	255.476	2.55338	pos	[M+H]+	97.100834;323.2552;95.08509;305.245806;139.110956	level3	4.65793e+07
Lansionic acid	0.714739	C30H46O3	455.351	666.546	0.506554	pos	[M+H]+	409.341599;187.148301;95.086082;191.179443;201.164576	level3	4.64475e+07
myrciaphenone B|myrciaphenone-B	0.91441	C21H22O13	481.098	80.6521	0.15396	neg	[M-H]-	481.095197;168.007077;125.023697;149.995662;167.033938	level3	4.6303e+07
Lirionol	0.865383	C22H24O8	417.152	89.4817	2.45254	pos	[M+H]+	167.068751;417.154935;181.048085;173.059451;387.145497	level3	4.62557e+07
9-Hydroxy-(10E,12Z,15Z)-octadecatrienoic acid	0.896215	C18H30O3	295.226	424.62	1.27267	pos	[M+H]+	277.217908;95.085821;93.069618;67.054306;121.100968	level3	4.62049e+07
orthodiffene B	0.77785	C21H22O8	401.123	169.674	1.43459	neg	[M-H]-	121.029803;383.109989;119.050413;163.039308;181.049441	level3	4.60878e+07
ascospiroketal A	0.998842	C23H34O8	439.229	204.816	0.64138	pos	[M+H]+	439.224207;275.197579;81.069373;440.230844;369.190389	level3	4.56159e+07
methyl 3-methyl-8-hydroxy-4-decenoate	0.953559	C12H22O3	213.149	299.724	1.54163	neg	[M-H]-	213.150401;183.139947;195.139481;214.027311;169.123482	level3	4.54698e+07
(2R,8S,6E)-14-((5S)-2-oxo-tetrahydrofuran-5-yl)-tetradec-6-en-2,8-diol|13'R-Hydroxy-Dihydro-5-(7-hydroxy-8-tetradecenyl)-2(3H)-furanone|piliferolide C	0.90139	C18H32O4	313.236	362.37	0.41508	pos	[M+H]+	295.22481;277.213165;141.127296;71.085624;99.080481	level3	4.54151e+07
Myricitrin	1	C21H20O12	503.057	84.9046	0.871061	pos	[M+H]+	503.050973;504.054944;55.896282;86.096207;107.049005	level2	4.5363e+07
6beta-acetoxy-7beta-hydroxy-8,13-epoxy-labd-14-en-11-one-1alpha-O-beta-glucopyranoside|forskoditerpenoside C	0.776766	C28H44O11	555.279	701.349	1.7761	neg	[M-H]-	555.283693;100.933669;116.927773;61.698556;556.274534	level3	4.52945e+07
[3aS-(3aalpha,8abeta,9aalpha)]-3a,7,8,8a,9,9a-Hexahydro-5,8a-dimethyl-3-methylenenaphtho[2,3-b]furan-2,6(3H,4H)-dione	0.921797	C15H18O3	247.132	199.942	0.653946	pos	[M+H]+	247.13185;187.111976;229.122358;201.126556;191.071225	level3	4.52809e+07
Phaeophorbide b	0.901008	C35H34N4O6	607.252	669.189	1.23078	pos	[M+H]+	607.253739;547.229432;579.253424;519.238109;608.260662	level2	4.51973e+07
Haematopodin	0.744498	C13H12N2O3	245.092	109.554	1.82492	pos	[M+H]+	159.090625;227.080314;245.093417;185.070018;132.080736	level2	4.51397e+07
3,7,11-trimethyl-2,6,10-dodecatrienal	0.914323	C15H24O	221.189	343.132	0.286479	pos	[M+H]+	221.188436;135.115986;81.069908;119.085417;203.17873	level3	4.5136e+07
3-oxo-1alpha-hydroxy-2-nor-1,3-cycloolean-12-en-30-oic acid|dysoxyhainic acid B	0.804575	C29H44O4	457.33	332.553	0.437327	pos	[M+H]+	107.085595;457.332553;439.320804;119.084998;133.100496	level3	4.48069e+07
7-Hydroxy-4-methylphthalide O-[arabinosyl-(1->6)-glucoside]	0.799721	C20H26O12	457.135	42.7255	0.660271	neg	[M-H]-	457.129755;163.039012;149.060566;119.050273;96.96967	level3	4.46926e+07
(9alpha)-9-methoxysesamin-2,2'-diol|5,5'-[(1S,3R,3aS,4S,6aR)-tetrahydro-3-methoxy-1H,3H-furo[3,4-c]furan-1,4-diyl]bis[1,3-benzodioxol-4-ol]	0.616192	C21H20O9	417.116	78.0464	0.911454	pos	[M+H]+	123.04345;417.161823;303.085351;127.038606;265.06771	level3	4.46727e+07
aspoquinolone B	0.836725	C27H31NO6	466.219	136.587	0.142494	pos	[M+H]+	184.073694;104.106722;466.21761;86.096214;124.999961	level3	4.45512e+07
5-hydroxy-2-(3-hydroxy-4,5-dimethoxyphenyl)-3,7-dimethoxychromen-4-one [IIN-based on: CCMSLIB00000848808]	1	C19H18O8	397.088	40.4615	0.180351	pos	[M+Na]+	397.088915;398.087953;70.06522;187.108354;235.059328	level2	4.45134e+07
(2'E,4'Z,7'Z,8E)-Colnelenic acid	0.881658	C18H28O3	293.21	238.047	0.927275	pos	[M+H]+	275.201641;81.070059;293.207837;131.048167;119.085639	level2	4.44892e+07
(10E,12E)-9,14-Dioxo-10,12-octadecadienoic acid	0.888769	C18H28O4	309.205	215.345	0.359924	pos	[M+H]+	147.044042;291.193644;81.069302;309.20692;273.185695	level3	4.42983e+07
Wattoside H	0.622202	C33H52O15	687.323	246.751	0.133899	neg	[M-H]-	687.316111;168.007177;125.023773;149.995586;76.370496	level3	4.4132e+07
3,4-Dihydroxy-11,12,13-trinor-8-eudesmanone	0.904764	C12H20O3	213.148	312.776	0.45035	pos	[M+H]+	213.164893;81.069924;171.116339;131.085662;157.100125	level3	4.38967e+07
3-methoxy-6,8-dimethyl-beta-naphthyl-beta-D-glucopyranosyl-6'-pimaran-17''-oic acid ester|catharanthusopimaranoside A	0.873661	C39H56O8	651.389	479.533	0.104012	neg	[M-H]-	651.394714;621.384408;149.023124;471.341732;161.024163	level3	4.38455e+07
(E)-2-hexenyl beta-D-sophoriside|(E)-2-Hexenyl-??-D-glucopyranosyl-(1閳ユ◤鍌楀瀻 2)-??-D-glucopyranoside	0.8684	C18H32O11	423.187	96.3636	0.986344	neg	[M-H]-	423.190426;59.013732;101.024804;187.096773;71.013748	level3	4.37812e+07
4-ethoxy-4-oxobut-2-enoic acid	0.894898	C6H8O4	145.049	36.5147	1.32603	pos	[M+H]+	99.043886;145.048706;43.017684;127.039109;71.04901	level3	4.36697e+07
(?)-(5S,10S)-13-isopropyl-7-oxo-abieta-8,11,13-trien-20-oicacid|inonotusic acid	0.981793	C21H28O2	311.202	630.844	1.84134	neg	[M-H]-	311.202281;149.097849;183.011859;184.020953;312.204835	level3	4.3353e+07
diplodiatoxin	0.755476	C18H28O4	309.205	393.503	0.615291	pos	[M+H]+	309.206738;81.069254;67.053837;93.069872;119.085746	level3	4.32053e+07
Plastoquinol-1	0.757435	C13H18O2	207.137	225.738	2.16888	pos	[M+H]+	163.110152;207.13649;121.064457;133.064449;69.033483	level3	4.31855e+07
4-oxo-1,7,10-trihydroxybisabol-2,11-diene	0.790537	C15H24O4	269.174	260.805	0.587586	pos	[M+H]+	269.171157;107.048929;81.070033;67.054325;93.069788	level3	4.30265e+07
4-O-alpha-L-rhamnopyranosyl-(1->2)-beta-D-xylopyranosyl-1,4,5-trihydroxy-7-methoxyxanthone|pseudonolin	0.788974	C25H28O14	551.14	141.053	0.422378	neg	[M-H]-	551.144543;152.011276;429.104375;121.029843;108.021678	level3	4.29725e+07
lobarialide C	0.846587	C29H42O3	439.32	533.917	0.0631321	pos	[M+H]+	439.323358;187.147629;121.101013;145.100606;95.084753	level3	4.2942e+07
Epicatechin	0.987858	C15H14O6	291.086	65.0917	1.63368	pos	[M+H]+	139.039694;123.043719;165.054995;147.043956;291.086206	level2	4.28102e+07
Steviol-19-O-glucoside	0.766999	C26H40O8	481.279	279.249	1.43828	pos	[M+H]+	481.285638;97.100399;81.069909;107.048713;109.100967	level2	4.27313e+07
Feruloyl quinic acid	0.801875	C17H20O9	367.103	61.9919	0.555373	neg	[M-H]-	191.056392;173.044451;93.034547;367.104163;193.049588	level2	4.26548e+07
NSC36563	0.890948	C22H24O8	417.154	284.721	1.66902	pos	[M+H]+	167.068936;417.155713;181.048221;191.068543;173.059633	level3	4.26422e+07
METHYL 3-HEXENOATE	0.999926	C7H12O2	127.076	71.212	1.67223	neg	[M-H]-	127.075518;59.013808;128.034978;109.065439;83.050113	level3	4.24609e+07
Quercetin	0.991638	C15H10O7	303.049	59.8664	0.721997	pos	[M+H]+	303.048411;285.123251;195.089738;151.039663;304.050668	level2	4.21351e+07
Hydrojuglone glucoside	0.886533	C16H18O8	339.107	175.196	0.321602	pos	[M+H]+	177.054126;145.027607;321.096679;339.106171;81.03336	level2	4.20642e+07
NSC107454	0.966082	C30H44O6	501.321	392.419	2.41875	pos	[M+H]+	501.32196;483.310898;435.284582;465.30019;502.319893	level3	4.19126e+07
Benzoic acid	1	C7H6O2	123.044	47.1673	3.7122	pos	[M+H]+	123.043726;124.039177;95.049337;81.069271;67.053821	level2	4.18897e+07
Phyllostadimer A	0.65669	C42H50O16	809.304	284.604	1.99227	neg	[M-H]-	165.056047;195.067333;150.032688;809.29836;613.229477	level3	4.17136e+07
Ilexsaponin A	0.729786	C36H56O11	709.373	297.766	10.4812	neg	M+HCOO	501.3154;709.377416;483.306092;663.369617;439.316554	level1	4.16652e+07
kodemarioside B	0.778071	C25H30O11	505.17	99.063	1.73915	neg	[M-H]-	145.029319;505.17807;125.023811;307.079687;300.027758	level3	4.15896e+07
Ethyl p-anisate	0.913969	C10H12O3	181.085	59.0847	1.95537	pos	[M+H]+	181.048177;148.050551;163.112435;153.053935;121.10108	level2	4.15485e+07
(1R,2R,5S,8R,14R,15R,16S)-16-hydroxy-1,2,14,17,17-pentamethyl-8-(prop-1-en-2-yl)pentacyclo[11.7.0.0²,¹⁰.0⁵,⁹.0¹⁴,¹⁸]icosane-5,15-dicarboxylic acid	0.914945	C30H46O5	487.34	337.623	0.256997	pos	[M+H]+	487.341948;201.163838;187.147501;423.327089;119.085617	level2	4.14588e+07
Pyrenocine A	0.685631	C11H12O4	209.08	265.895	0.656671	pos	[M+H]+	167.068802;149.059146;209.082257;177.05403;121.064609	level3	4.11273e+07
kodemarioside F	0.70341	C25H30O12	521.165	60.7647	0.86296	neg	[M-H]-	521.165594;145.028958;161.02382;307.079471;96.969877	level3	4.08192e+07
Tricetin 4'-methyl ether	0.694489	C16H12O7	317.065	65.4941	2.72462	pos	[M+H]+	299.053745;153.017689;191.033174;163.037741;317.068118	level3	4.08001e+07
garcimangosone D	0.879182	C19H20O9	391.102	75.9391	1.95975	neg	[M-H]-	229.051502;391.107056;151.003987;185.062059;281.066957	level3	4.05995e+07
Officinaruminane A	0.63652	C39H37NO2	552.292	270	0.896901	pos	[M+H]+	552.288673;184.073617;104.106662;86.096135;534.279999	level3	4.05899e+07
Benzene, propenyl-	1	C9H10	119.085	210.725	1.96133	pos	[M+H]+	119.085679;120.044465;91.053468;92.049156;117.06988	level3	4.05101e+07
Pyridoxine	0.881752	C8H11NO3	170.081	35.7409	1.39534	pos	[M+H]+	152.07041;170.079313;134.059403;121.041974;112.036924	level2	4.04515e+07
Leptin H	0.702123	C18H26O7	355.169	359.445	13.4246	pos	[M+H]+	147.11664;81.033287;165.126242;355.178112;127.038904	level3	4.03688e+07
sweroside	0.91584	C16H22O9	357.118	63.5957	1.15112	neg	[M-H]-	59.013748;89.02448;71.013768;357.1148;101.024881	level2	4.03307e+07
m-Xylene	0.9736	C8H10	107.085	61.4301	1.59789	pos	[M+H]+	107.084795;91.053474;79.054091;105.069392;119.060473	level2	4.03143e+07
3,4,5-Trimethoxy_ cinnamic acid	0.999516	C12H14O5	239.094	38.1411	11.7819	pos	[M+H]+	147.04398;119.048378;240.086582;91.053518;89.059578	level2	4.01524e+07
(E)-3,3?-(3-methylbutane-1,1-diyl)-bis-(6-((E)-3,4-dihydroxystyryl)-4-hydroxy-2H-pyran-2-one)|phaeolschidin B	0.791916	C31H28O10	561.175	359.736	2.54205	pos	[M+H]+	561.180618;147.044019;323.087991;308.067998;119.048091	level3	3.98753e+07
ETHYL VANILLIN	0.890918	C9H10O3	167.07	50.2728	2.05027	pos	[M+H]+	167.068649;121.101143;107.084843;139.037676;123.043696	level3	3.97595e+07
(3E,12E)-3,12-dimethyl-8-methylidene-6,18-dioxatricyclo[14.2.1.0⁵,⁹]nonadeca-3,12,16(19)-triene-7,17-dione	0.73841	C20H24O4	351.156	39.7513	7.06719	pos	[M+Na]+	351.155287;267.132451;291.134289;334.118093;315.154307	level2	3.97207e+07
(-)-(3S,4R,6S)-3-(3',4'-Methylenedioxy-alpha-hydroxybenzyl)-4-(3'',4''-dimethoxybenzyl)butyrolactone	0.782012	C21H22O7	387.143	222.816	0.561541	pos	[M+H]+	337.10552;107.048683;369.132888;191.070767;351.123047	level3	3.9716e+07
6-O-Nicotinoylstrychnovoline	0.764263	C17H18N2O5	331.128	39.771	0.0907669	pos	[M+H]+	331.125148;287.138249;254.077616;228.08836;271.10519	level3	3.96726e+07
Didymocarpin A	0.687615	C17H16O6	317.101	213.095	1.15485	pos	[M+H]+	107.048958;211.058888;317.100935;193.048597;151.037813	level3	3.96629e+07
neosedumoside III	0.792254	C19H28O7	369.189	59.5765	0.456502	pos	[M+H]+	189.127423;207.136575;177.054159;174.102649;191.141345	level3	3.95933e+07
14-hydroxy-3beta-(O3-methyl-alpha-L-arabino-2,6-dideoxy-hexopyranosyloxy)-5beta,14beta-carda-16,20(22)-dienolide|14-Hydroxy-3beta-(O3-methyl-alpha-L-arabino-2,6-didesoxy-hexopyranosyloxy)-5beta,14beta-carda-16,20(22)-dienolid	0.890178	C30H44O7	517.315	360.967	0.532469	pos	[M+H]+	517.309206;499.305139;453.296563;184.073217;104.106349	level3	3.92545e+07
(1R,4aS,5R,7R,7aR)-1-ethoxy-1,4a,5,6,7,7a-hexahydro-5-hydroxy-7-methylcyclopenta[c]pyran-4-carbaldehyde|incarvilleaol	0.833892	C12H18O4	227.127	179.708	0.720638	pos	[M+H]+	111.044345;181.120836;191.105742;163.112269;227.070142	level3	3.92302e+07
8, 18-Di-Ac-(4beta, 8alpha, 9alpha, 14beta)-3(16)-Fusicoccene-4, 8, 9, 14, 18-pentol|Fusicoplagin A	0.750888	C24H38O7	439.267	224.036	1.34935	pos	[M+H]+	277.218237;439.235219;137.096484;259.205763;133.101373	level3	3.92238e+07
4-Hydroxy-1,8-epi-isotenerone	0.901936	C15H22O2	235.169	172.527	0.397908	pos	[M+H]+	235.167362;149.095798;107.084601;217.157754;95.049074	level3	3.86862e+07
Phenylethanol + Hex-Pen	0.69425	C19H28O10	415.161	81.2571	2.94697	neg	[M-H]-	89.024521;59.013787;149.045528;71.013802;101.023758	level3	3.86741e+07
7-Gingerol	0.896223	C18H28O4	309.205	248.31	0.827481	pos	[M+H]+	147.043896;291.193189;309.206519;81.069274;95.084964	level3	3.8514e+07
3-hydroxy-7-prop-1-en-2-yl-5,6,7,8-tetrahydronaphthalene-1-carbaldehyde	0.835284	C14H16O2	217.122	64.3037	1.79123	pos	[M+H]+	217.050221;121.064441;199.111814;81.069203;109.064342	level3	3.82517e+07
4-(3,3-dimethylpenta-1,4-dienyl)phenol	0.956241	C13H16O	189.127	100.585	0.0920945	pos	[M+H]+	189.127397;119.085787;174.102664;190.048342;147.116834	level3	3.8235e+07
Farrerol	0.82792	C17H16O5	301.107	282.462	2.55199	pos	M+H	107.048941;195.064071;301.107203;153.054092;177.054237	level1	3.81186e+07
(12S)-15,16-Epoxy-13(16),14-labdadien-8,12-diol|8alpha,12-dihydroxy-15,16-epoxy-12S-labda-13(16),14-diene	0.955629	C20H32O3	321.241	367.121	3.08994	pos	[M+H]+	303.231044;97.10043;81.069861;135.116042;95.085776	level3	3.80841e+07
CHEMBL451877	0.677672	C31H24O10	555.134	42.587	0.163457	neg	[M-H]-	555.142431;125.023804;195.028614;313.070064;305.10055	level3	3.79374e+07
NSC629155	1	C20H30O5	351.214	319.776	0.322408	pos	[M+H]+	351.210833;352.212785;277.213081;111.07979;81.06936	level3	3.78608e+07
Camaranoic acid	0.866854	C30H44O5	485.325	481.969	0.284938	pos	[M+H]+	485.332033;439.32201;165.090121;467.321399;187.147359	level3	3.78071e+07
N-Acetylhistamine	1	C7H11N3O	136.086	875.759	2.70124	pos	M+H-H2O	136.086738;137.080757;95.060464;109.075415;68.04934	level1	3.77021e+07
3,4',5,5',7-pentahydroxy-3'-methoxy-6-(3-methyl-2-butenyl) flavanone	0.816944	C21H22O8	401.124	267.087	1.04292	neg	[M-H]-	401.126242;253.073853;357.132889;273.075079;209.082387	level3	3.76491e+07
ingenol-3-angelate-17-benzoate-20-acetate	0.847964	C34H40O9	593.273	754.656	1.62739	pos	[M+H]+	593.274591;533.259448;594.281412;460.22208;461.231913	level3	3.76452e+07
2-[(6-O-(E)-caffeoyl)-beta-D-glucopyranosyl]-oxyphenol|dodegranoside A	0.84339	C21H22O10	433.113	138.595	1.06235	neg	[M-H]-	433.120949;122.037434;167.035436;59.013586;71.01351	level3	3.73857e+07
Pendulone	0.839323	C17H16O6	317.096	312.401	15.5877	pos	[M+H]+	107.049007;149.058979;211.059049;317.101226;193.048758	level2	3.73413e+07
Salannin	0.780795	C34H44O9	597.313	534.176	14.0916	pos	[M+H]+	262.226271;261.220022;354.271201;81.069893;335.255735	level2	3.72105e+07
17-hydroxyestra-1,3,5(10)-trien-3-yl hydrogen sulfate	0.652475	C18H24O5S	351.129	63.8907	0.339857	neg	[M-H]-	101.060252;351.13182;113.024951;59.013755;249.063547	level3	3.71727e+07
Adipic acid	0.791837	C6H10O4	145.052	902.277	1.6818	neg	M-H	100.933406;145.052038;118.041771;101.951224;57.962013	level1	3.70701e+07
penicitide A	0.752079	C18H34O4	315.252	299.334	1.16963	pos	[M+H]+	279.229533;95.084944;81.069249;67.053783;109.101364	level3	3.70297e+07
Dehydrovomifoliol	0.994151	C13H18O3	223.132	122.214	1.51287	pos	[M+H]+	223.13187;83.048879;205.122414;111.079741;165.090798	level2	3.69554e+07
Histidinal	0.642575	C6H9N3O	140.081	844.992	1.80357	pos	[M+H]+	58.028439;140.082349;99.055661;98.071347;122.071394	level2	3.68141e+07
viscumneoside I	0.674283	C28H34O14	593.185	261.519	3.12403	neg	[M-H]-	147.045307;445.135623;593.184177;154.028067;169.049403	level3	3.66169e+07
neosedumoside I	0.828818	C19H30O8	387.2	103.629	0.55824	pos	[M+H]+	387.200529;137.059801;151.075601;207.136347;85.028397	level3	3.64024e+07
Dimethicone	0.673672	C6H18OSi2	163.097	780.872	1.76547	pos	[M+H]+	163.097681;81.044738;122.071621;54.033601;136.086724	level2	3.63117e+07
Disydonol A	0.999598	C30H46O5	485.327	455.965	0.0782129	neg	[M-H]-	485.328027;439.320703;53.926068;486.330386;441.34353	level3	3.6299e+07
ACon1_000264	0.833732	C26H42O8	483.294	209.129	0.0414927	pos	[M+H]+	97.100376;483.298206;465.285163;95.085714;81.069901	level3	3.62971e+07
3,4,-dihydro-6,8-dihydroxy-3-(2'-acetyl-3'-O-beta-D-glucopyranosyl-5'-hydroxyphenyl)methyl-2(1H)-benzopyran-1-one	0.872177	C24H26O12	505.134	107.107	1.96251	neg	[M-H]-	505.137716;343.084387;315.086942;209.046703;237.039444	level3	3.61864e+07
ACMC-20md0m	0.833808	C18H28O4	309.205	428.031	1.01544	pos	[M+H]+	113.060122;291.191858;309.205797;95.049419;57.033191	level3	3.60264e+07
Trilobatin H	0.708916	C42H42O23	913.203	36.7581	0.307741	neg	[M-H]-	913.212797;751.15461;437.085718;463.063572;589.104428	level3	3.58032e+07
Brazilin	0.949939	C16H14O5	287.086	205.501	18.4664	pos	[M+H]+	287.051268;181.048294;107.049025;163.037849;139.037926	level2	3.5717e+07
Dihydroberberine	0.974817	C20H19NO4	338.138	162.108	0.920954	pos	M+H	338.140356;323.114686;322.105981;294.112908;177.0536	level1	3.56556e+07
A:D-Neooleana-12,14-diene, (3.xi.,5.alpha.)-	0.710667	C30H48	409.383	762.009	2.33562	pos	[M+H]+	409.275525;95.085704;137.132515;109.101209;271.23973	level3	3.56545e+07
PANTOTHENIC ACID	0.995288	C9H17NO5	220.112	36.2781	22.7585	pos	[M+H]+	90.054331;220.118079;202.105926;184.097348;116.033734	level2	3.56476e+07
Methyl jasmonate	0.635563	C13H20O3	225.148	128.898	0.204194	pos	[M+H]+	123.079587;182.116625;136.111166;83.048669;225.149795	level2	3.5592e+07
6-(4'-Hydroxy-trans-styryl)-2-pyron	0.731896	C13H10O3	215.07	286.013	1.6643	pos	[M+H]+	187.074363;215.068075;141.068746;172.052833;169.063977	level3	3.55578e+07
2-hydroxyoctadeca-3-enoic acid methyl ester	0.986661	C19H36O3	313.272	632.869	2.1128	pos	[M+H]+	313.273032;57.069578;71.085612;85.100956;95.085128	level3	3.55313e+07
3-O-p-Coumaroyltormentic acid	0.700239	C39H54O7	635.391	522.535	1.65947	pos	[M+H]+	147.043488;407.329522;187.148099;201.163866;617.382775	level3	3.5503e+07
6'-acetyl-beta-D-glucopyranosyldiderroside	0.937852	C21H30O14	505.157	41.7142	1.03747	neg	[M-H]-	301.072216;195.028106;463.124574;507.118581;153.018745	level3	3.54859e+07
Spirost-5-en-3-yl acetate	0.772239	C29H44O4	457.331	366.087	1.96537	pos	[M+H]+	457.332564;107.084782;385.27718;439.324445;173.132984	level3	3.54485e+07
beta-Citraurol	0.767381	C30H42O2	435.324	570.528	1.6863	pos	[M+H]+	435.3278;149.131165;189.164808;135.116352;201.16418	level2	3.54296e+07
(6Z,9Z,12Z)-6,9,12-Pentadecatrien-2-one	0.952896	C15H24O	221.189	365.196	0.380084	pos	[M+H]+	203.179556;221.188669;95.08523;147.117032;107.085213	level3	3.53814e+07
Rhodomollein XI	0.819536	C22H36O8	427.234	431.003	1.84804	neg	[M-H]-	427.136296;167.033763;273.074034;398.096687;303.088757	level3	3.53512e+07
Ganoderic acid B	0.687811	C30H44O7	515.299	360.496	2.94551	neg	[M-H]-	515.303155;453.305674;111.008857;471.306347;57.256244	level3	3.52183e+07
Chuanxiongol	0.814019	C13H14O3	219.101	123.638	0.979397	pos	[M+H]+	219.102721;189.089922;174.06675;201.089152;131.084291	level3	3.51444e+07
Agestricin D	0.858307	C18H18O7	345.103	191.812	13.9292	neg	[M-H]-	345.099091;167.0336;273.07483;125.025121;179.033789	level3	3.51358e+07
oregonoside A	0.895767	C32H36O12	613.227	198.572	1.63073	pos	[M+H]+	613.223872;167.068785;181.048005;173.059491;385.124032	level3	3.50208e+07
Xanthochymuside	0.69362	C36H32O16	719.157	194.931	5.30047	neg	[M-H]-	557.109384;719.156355;405.099282;299.0571;151.003607	level3	3.48379e+07
[(2S,3R,4S,5S,6R)-3,4,5-trihydroxy-6-(hydroxymethyl)oxan-2-yl] (1S,4aR,6aS,6bR,9R,10R,11R,12aR)-1,10,11-trihydroxy-9-(hydroxymethyl)-2,2,6a,6b,9,12a-hexamethyl-1,3,4,5,6,6a,7,8,8a,10,11,12,13,14b-tetradecahydropicene-4a-carboxylate	0.932926	C36H58O11	665.389	326.971	0.282863	neg	[M-H]-	665.384875;503.343335;459.343947;485.327617;441.339808	level2	3.46609e+07
Picrasidine K	0.916646	C18H23N3O2	312.172	598.463	1.58985	neg	[M-H]-	312.173225;183.011897;184.014485;313.169282;98.956261	level3	3.46254e+07
Aurantiamide	0.943464	C25H26N2O3	403.2	362.272	2.04918	pos	M+H	105.033292;152.106179;385.18748;224.107074;117.069868	level1	3.4509e+07
2-FORMYL-6-HYDROXYBENZOIC ACID	0.626881	C8H6O4	165.019	53.5088	0.318037	neg	[M-H]-	165.018394;137.02506;121.029747;75.008881;150.033193	level3	3.44679e+07
Methyl botryoloate	0.690815	C18H30O6	343.21	256.221	1.50672	pos	[M+H]+	325.202176;107.048738;95.085792;81.069906;125.095184	level3	3.44554e+07
Curcumol	0.892654	C15H24O2	237.184	169.197	0.603233	pos	[M+H]+	151.110971;237.074816;81.069909;133.100952;93.069579	level2	3.43479e+07
5-Methyl-2-furancarboxaldehyde	0.964855	C6H6O2	111.044	48.9524	3.41261	pos	[M+H]+	111.043268;83.048955;55.054256;43.017757;88.003758	level2	3.42056e+07
1-O-deacetyl-1-O-tigloylohchinolide A	0.715571	C40H46O10	685.308	259.753	0.315989	neg	[M-H]-	685.307546;168.007022;125.023666;149.995464;76.145901	level3	3.41475e+07
Isocarnosol	0.938666	C20H26O4	329.175	491.217	1.20834	neg	[M-H]-	287.194302;285.184138;286.186682;331.184811;288.195655	level3	3.40314e+07
Cinatrin B	0.71883	C18H28O8	373.184	214.209	1.59052	pos	[M+H]+	147.116355;165.125965;81.069907;107.048724;229.142794	level3	3.37904e+07
(6S,1'S)-6-(1'-hydroxy-5'-hydroperoxy-1',5'-dimethyl-3'-hexenyl)-3-methyl-2-cyclohexenone|peroxylippidulcine A	0.841471	C15H24O4	269.173	430.911	2.05934	pos	[M+H]+	269.171356;81.069264;67.053809;93.069856;149.131158	level3	3.37522e+07
(3beta,4beta,16alpha)-17-carboxy-16,24-dihydroxy-28-norolean-12-en-3-yl beta-D-glucopyranosiduronic acid methyl ester	0.843703	C37H58O11	677.389	393.042	1.75409	neg	[M-H]-	469.334225;677.39543;631.377963;116.92915;479.201824	level3	3.3675e+07
(+)-4,5-Didehydrojasmonic acid	0.908761	C12H16O3	209.116	223.439	3.00311	pos	[M+H]+	163.112499;135.116227;95.084882;93.069768;145.100801	level3	3.36151e+07
Parietinic acid	0.645483	C16H10O7	313.035	259.622	1.10213	neg	[M-H]-	269.047248;313.03572;226.027528;242.021072;227.033812	level3	3.35412e+07
GB-1[Garcinia]	0.645324	C30H22O11	559.125	196.784	4.96165	pos	[M+H]+	559.127506;411.06679;153.017649;107.048953;407.114004	level3	3.35016e+07
Z,E,Z-cupaniopsin A	0.921964	C30H42O5	483.31	486.849	0.140327	pos	[M+H]+	483.31094;437.306403;419.289767;465.29887;119.085488	level3	3.34862e+07
(2S,3S)-2-(4-hydroxy-3-methoxybenzyl)-3-(5-methoxy-3,4-methylenedioxybenzyl)butyrolactone	0.806495	C21H22O7	387.143	270.289	0.629592	pos	[M+H]+	137.05981;387.14571;181.048075;107.048972;167.068841	level3	3.33363e+07
2-(1-Methylethylidene)pentanedioic acid	0.802109	C8H12O4	171.066	68.9842	1.66998	neg	[M-H]-	127.075511;109.065327;171.06716;59.013779;130.086899	level3	3.33307e+07
cuminyl alcohol	0.997569	C10H14O	133.101	257.815	1.24967	pos	[M+H-H2O]+	133.101344;105.069511;91.05348;134.104177;131.086019	level2	3.33092e+07
ACRL Toxin I	0.974073	C19H30O6	353.201	618.968	1.50343	neg	[M-H]-	353.202704;96.959413;317.212099;79.957348;122.975494	level3	3.32847e+07
Filixic acid ABP	0.837919	C33H38O12	627.243	248.149	1.46836	pos	[M+H]+	121.064141;627.260101;137.059694;86.096195;209.082347	level3	3.32244e+07
1-(2,5-dihydroxy-4-methylphenyl)ethanone	0.926861	C9H10O3	167.07	194.791	1.9576	pos	[M+H]+	167.068838;123.043631;43.01769;124.051132;78.04636	level3	3.31096e+07
1-O-(4''-Caffeoyl)-beta-glucopyranosyl-1,4-dihydroxy-2-(3',3'-dimethylallyl)benzene|1-O-(4''-O-caffeoyl)-beta-glucopyranosyl-2-(3',3'-dimethylallyl) hydroquinone|1-O-(4''-O-caffeoyl-beta-glucopyranosyl)-1,4-dihydroxy-2-(3',3'-dimethylallyl)benzene	1	C26H30O10	503.189	136.83	1.20466	pos	[M+H]+	503.18627;504.190388;55.910828;137.059652;107.04879	level3	3.30651e+07
5,7-dimethoxy-8-hydroxyflavanone	0.851484	C17H16O6	315.088	234.486	2.49993	neg	[M-H]-	315.086303;167.033956;209.046299;125.02389;137.05994	level3	3.29129e+07
(1S,4aS,7aS)-1-(beta-D-glucopyranosyloxy)-1,4a,5,7a-tetrahydro-7-(hydroxymethyl)cyclopenta[c]pyran-4-carboxylic acid|geniposidic acid	0.937178	C16H22O10	373.113	44.9366	1.17354	neg	[M-H]-	211.059427;373.111473;193.049607;59.013926;181.04927	level3	3.25377e+07
(R)-1-Methyl-4-(1-methyl-5-hexenyl)-benzene	0.926207	C14H20	189.163	568.935	0.219476	pos	[M+H]+	189.161793;147.116949;119.085741;133.101364;95.085015	level3	3.24646e+07
Fraxiformoside	0.855062	C32H38O13	629.224	205.819	0.235625	neg	[M-H]-	629.229454;165.056422;150.033039;433.153666;373.130367	level3	3.2432e+07
Methyl evernate	0.683817	C18H18O7	347.112	179.686	0.708282	pos	[M+H]+	107.048986;108.051669;331.103561;109.054933;225.06467	level3	3.23784e+07
celastoside	0.984038	C30H46O5	487.34	436.095	0.0880451	pos	[M+H]+	487.340321;469.324674;451.322616;488.346888;439.323566	level3	3.23575e+07
(-)-methyl (2E)-2-[(1'R)-1'-hydroxy-2'-oxopropyl]tetradeca-2,13-dienoate|secoisolitsealiicolide B	0.939341	C18H30O4	311.221	342.973	0.237199	pos	[M+H]+	293.213614;311.217657;111.079598;275.199803;55.053944	level3	3.23539e+07
MCULE-9302085165	0.706294	C20H30O5	351.215	344.788	3.34499	pos	[M+H]+	137.059798;277.180436;351.210379;111.043088;81.06996	level3	3.22856e+07
1-(2,3-dihydroxy-4-methoxyphenyl)ethanone	0.991585	C9H10O4	183.064	379.377	3.25765	pos	[M+H]+	183.064797;141.054779;43.017671;155.069295;109.064448	level3	3.22787e+07
Epoxyeremopetasinorol	0.768477	C13H20O3	225.148	163.683	0.0291762	pos	[M+H]+	99.043621;207.135961;225.149723;183.138655;107.084696	level3	3.22616e+07
6-Gingerol	0.989462	C17H26O4	293.179	656.943	1.37055	neg	[M-H]-	293.180449;96.959624;134.894765;131.044824;294.182869	level2	3.22565e+07
ISOEUGENOL	0.818137	C10H12O2	165.091	174.057	2.83412	pos	[M+H]+	137.059995;147.044193;105.069685;124.051066;165.090794	level2	3.2199e+07
4-Methylcyclohex-3-enecarbaldehyde	0.947652	C8H12O	125.096	282.981	3.19404	pos	[M+H]+	125.095612;43.017688;107.085031;55.054178;83.048973	level3	3.2096e+07
MS000026072	0.785865	C21H34O6	383.242	227.3	0.933583	pos	[M+H]+	184.073415;383.243917;107.048842;104.106573;81.070014	level3	3.19316e+07
(+)-Samidin	0.650873	C21H22O7	387.136	154.949	18.7383	pos	[M+H]+	233.082013;173.059586;145.065225;137.059837;207.136583	level3	3.18016e+07
NSC274238	0.808394	C7H14O6	195.087	121.674	1.09184	pos	[M+H]+	195.08695;177.054337;138.064993;145.027659;117.033435	level3	3.15791e+07
Antioxidant 425	0.738	C25H36O2	367.264	758.738	0.95307	neg	[M-H]-	367.26425;205.15801;149.097799;368.271726;206.163405	level3	3.14815e+07
Kuwanon M	0.738554	C50H48O12	839.312	270.018	0.551055	neg	[M-H]-	839.32419;223.060124;207.065289;165.056108;208.038748	level3	3.14187e+07
(-)-Syringaresinol	0.978343	C22H26O8	401.158	269.032	0.529232	pos	M+H-H2O	330.107105;167.070907;383.144999;315.083869;217.084202	level1	3.13068e+07
Adouetine Z	0.822101	C42H45N5O5	700.35	79.2242	2.28338	pos	[M+H]+	700.340286;183.147783;268.166472;86.096042;211.143681	level3	3.12762e+07
4-hydroxy-6,7-dimethoxy-2,3-dimethyl-4-piperonyltetralin-2-en-1-one	0.714544	C21H20O6	369.132	220.572	1.08715	pos	[M+H]+	315.083049;369.13005;351.126168;338.118239;269.080166	level3	3.12489e+07
Scutellarein	0.996064	C15H10O6	285.04	244.81	1.31199	neg	M-H	285.039112;229.051307;185.061782;151.003896;257.043648	level1	3.12369e+07
4-Methoxyphenylacetic acid	0.774804	C9H10O3	165.056	36.4773	4.14047	neg	[M-H]-	165.041336;75.008629;58.005972;121.029571;93.034222	level2	3.1107e+07
12-Hydroxy-13-methylpodocarpa-8,11,13-trien-3-one	0.858328	C18H24O2	273.184	316.522	0.644964	pos	[M+H]+	273.185723;119.085853;131.084395;161.096318;145.101043	level3	3.10465e+07
MELIANONE	0.727915	C30H46O4	469.331	558.908	2.94502	neg	[M-H]-	469.334011;423.326555;241.215668;425.340965;52.148523	level3	3.10178e+07
3-oxo-11,12,13-trihydroxy-eudesm-4-ene|eudismane	0.913158	C15H24O4	269.174	289.899	1.08297	pos	[M+H]+	241.04929;269.044157;81.070005;93.069754;67.054371	level3	3.09174e+07
Blepharolide A	0.880266	C20H20O6	357.132	227.701	0.235428	pos	[M+H]+	307.093939;321.114431;339.127457;137.059043;289.084947	level3	3.09099e+07
Sakuranetin	0.812795	C16H14O5	287.09	335.745	2.38515	pos	[M+H]+	181.048246;107.049012;163.0378;139.037843;287.092206	level2	3.08712e+07
Flazine	0.913393	C17H12N2O4	309.091	207.077	14.4966	pos	[M+H]+	309.089128;263.080242;281.092234;206.084848;310.088965	level2	3.07531e+07
canescin A|Canescin-A	0.719234	C15H14O7	307.08	40.9221	0.447155	pos	[M+H]+	193.049068;259.060464;84.080323;307.077306;243.170352	level3	3.0744e+07
Hymatoxin A	0.825737	C20H30O7S	413.166	40.3917	0.203715	neg	[M-H]-	367.163513;235.119195;101.023689;71.013805;161.046165	level3	3.07282e+07
ACMC-20mxsg	0.879931	C18H24O	257.19	402.197	2.23564	pos	[M+H]+	257.188965;173.130661;157.100885;199.14998;159.116761	level3	3.05498e+07
Pedunculoside	0.951985	C36H58O10	695.399	359.065	3.07836	neg	M+HCOO	487.335835;695.409792;649.402086;488.343808;207.051373	level1	3.05427e+07
2-oxobutanoic acid	0.971146	C4H6O3	101.024	33.1349	2.78852	neg	[M-H]-	100.945815;55.018966;57.034403;73.029471;83.013841	level3	3.05337e+07
5beta,16beta-dihydroxybufalin-3-O-beta-glucoside	0.800835	C30H44O11	579.285	590.94	1.53152	neg	[M-H]-	579.277523;80.964779;225.008607;94.980284;164.985912	level3	3.0433e+07
osmanthuside H	0.8623	C19H28O11	431.151	84.7686	9.54028	neg	[M-H]-	89.024305;59.013646;71.013596;293.089788;162.838988	level2	3.04316e+07
(+)-6-ethenyl-2-hydroxy-6,10-dimethylundeca-2,9-dien-4-one|melicopenol	0.890596	C15H24O2	237.184	242.054	0.100077	pos	[M+H]+	179.141745;237.184428;95.085738;71.048818;151.110932	level3	3.04027e+07
methyl (3S,5S)-5-hydroxy-3-(beta-D-glucopyranosyl)-hexanoate	0.919245	C13H24O8	307.139	81.4262	0.13361	neg	[M-H]-	307.137682;145.087773;59.013714;89.024446;101.024832	level3	3.0382e+07
Seguinoside G	0.605738	C22H30O12	485.166	131.88	3.07293	neg	[M-H]-	485.161592;323.131866;179.033731;161.023703;177.054877	level3	3.0341e+07
Fruticulin B|Fruticuline B	0.793605	C19H18O4	311.127	140.464	0.586167	pos	[M+H]+	311.055458;251.10592;279.100447;137.058558;219.079686	level3	3.03321e+07
Polygodial	0.952929	C15H22O2	235.169	292.007	0.659169	pos	M+H	235.171812;121.100977;93.069573;107.085992;79.053893	level1	3.03287e+07
Castanospermine	0.625767	C8H15NO4	190.108	841.063	0.505981	pos	[M+H]+	190.108398;149.080819;150.088752;148.087402;173.081583	level2	3.02856e+07
(3S)-6-(3-phenyl-5-acetoxy-6-methoxy-benzo[b]furan-2-ylmethyl)-vestitol triacetate|(3S)-6-(3-Phenyl-5-acetoxy-6-methoxybenzo[b]furan-2-ylmethyl)-vestitol-triacetate	0.998849	C38H34O10	651.223	63.7683	1.20835	pos	[M+H]+	651.229623;652.228058;72.35998;489.166224;181.048154	level3	3.02068e+07
12-O-acetylazedarachin B	0.664475	C34H44O12	643.274	188.042	0.67736	neg	[M-H]-	643.270471;327.220323;241.013063;152.996345;78.959267	level3	3.0176e+07
N-[[3-(b-D-Glucopyranosyloxy)-2,3-dihydro-2-oxo-1H-indol-3-yl]acetyl]aspartic acid	1	C20H24N2O12	485.141	57.3512	0.880256	pos	[M+H]+	485.139845;486.142278;53.905591;181.050616;353.048775	level2	3.00862e+07
3,4-dihydro-4-methoxy-2-methyl-2H-chromen-5-ol	0.763936	C11H14O3	195.101	54.8366	0.273782	pos	[M+H]+	107.048948;195.086743;163.075045;167.068733;138.066751	level3	2.99771e+07
Przewalskin	0.898107	C18H24O2	273.184	339.211	0.628244	pos	[M+H]+	273.185788;231.138272;217.122637;131.086076;69.069346	level3	2.98828e+07
Benzofuran	0.999998	C8H6O	119.049	262.014	1.36968	pos	[M+H]+	119.048328;91.054545;120.04427;92.04927;65.03823	level2	2.98562e+07
1,3-Benzenediol	0.998123	C6H6O2	111.044	35.2269	3.29427	pos	[M+H]+	111.043148;83.04883;55.054156;43.017651;112.047057	level2	2.97991e+07
Descurainolide B	0.758386	C21H22O8	403.137	251.95	1.30734	pos	[M+H]+	107.048705;167.070735;181.050345;403.140461;108.052623	level3	2.97947e+07
6beta-ethoxyeremophil-7(11)-en-12,8-olide	0.86674	C17H26O3	279.195	451.405	0.181035	pos	[M+H]+	251.200605;279.195271;233.188179;111.044284;69.069821	level3	2.97808e+07
gaudichaudiic acid F	0.864639	C40H50O9	673.345	262.683	0.845005	neg	[M-H]-	673.344223;152.011095;375.275573;109.029728;153.019426	level3	2.97793e+07
Catechin	0.945939	C15H14O6	289.071	44.9543	0.146899	neg	[M-H]-	289.07244;245.082464;109.029487;85.029641;203.071613	level2	2.97739e+07
9,9a-dihydro-naphtho[2,3-c]isoxazol-3(1H)-one|naphthisoxazol A	0.63631	C11H9NO2	188.07	52.7197	0.0822324	pos	[M+H]+	188.070475;146.06014;170.060481;81.033349;118.064498	level3	2.97365e+07
5-O-feruloyl-2-deoxy-D-ribono-gamma-lactone|[(2R,3S)-1,2,3,4-tetrahydro-3-hydroxy-5-oxofuran-2-yl]methyl (E)-3-(4-hydroxy-3-methoxyphenyl)prop-2-enoate	0.710197	C15H16O7	309.096	243.316	1.02161	pos	[M+H]+	147.043977;291.086157;81.033353;119.048346;165.055026	level3	2.96701e+07
SCHEMBL2317363	0.788617	C18H26O4	307.19	390.035	1.7318	pos	[M+H]+	289.176184;57.033342;159.080817;271.1701;55.054175	level3	2.96415e+07
Ochraceolide D	0.899179	C30H46O5	485.327	432.546	0.711487	neg	[M-H]-	485.327336;441.343116;467.315445;377.286338;53.92605	level3	2.96219e+07
Feruloyl-2-hydroxyputrescine	0.789568	C14H20N2O4	281.145	34.2407	11.2071	pos	[M+H]+	281.14896;123.078158;235.145543;150.077697;136.062143	level2	2.96208e+07
7beta,15alpha-dihydroxykaurenolide|ent-7beta,15alpha-dihydroxy-kaurenolide	0.948246	C20H28O4	333.203	429.332	1.24822	pos	[M+H]+	333.203404;167.068831;137.059869;300.081678;51.481397	level3	2.95773e+07
Gingerglycolipid A	0.790848	C33H56O14	677.373	511.479	0.221447	pos	[M+H]+	261.220129;353.265262;81.069873;243.210801;95.085866	level3	2.95278e+07
(2'S)-2',3'-dihydroxypropyl 1,6,8-trihydroxy-3-methylanthraquinone-2-carboxylate	0.77102	C19H16O9	387.072	241.52	2.23519	neg	[M-H]-	387.068418;295.026436;267.029924;343.115689;195.067594	level3	2.93521e+07
5-hydroxyfurfural	0.992754	C5H4O3	111.009	106.683	1.98292	neg	[M-H]-	111.008858;67.019045;41.003308;55.018909;124.466855	level3	2.93392e+07
(S)-(+)-4'-O-senecioyl-5-O-methylvisamminol	0.913821	C21H24O6	371.153	275.776	0.915766	neg	[M-H]-	80.964782;289.179586;371.155729;79.957292;191.142093	level3	2.93274e+07
(7R,8R/7S,8S)-7,8-dihydroxy-5,6-didehydrokavain	0.825501	C14H14O5	261.088	51.7408	41.0996	neg	[M-H]-	155.033796;261.077102;137.025081;113.024816;111.045189	level3	2.9283e+07
Sterebin A	0.733591	C18H30O4	309.207	369.679	0.11896	neg	[M-H]-	309.209694;291.197195;226.956483;228.951585;265.180465	level3	2.92237e+07
multiforisin D	0.692949	C22H22O9	429.119	238.538	0.503564	neg	[M-H]-	429.113771;193.049585;134.0369;161.024008;253.069198	level3	2.91634e+07
(2S)-5,7-Dimethoxy-8-formylflavanone	0.662438	C18H16O5	313.106	333.169	0.567089	pos	[M+H]+	107.049018;207.065083;313.106694;165.055274;189.05269	level3	2.90512e+07
LEVULINIC ACID	0.999442	C5H8O3	115.04	48.7837	0.681825	neg	[M-H]-	71.013662;115.040144;115.920503;59.013769;99.926233	level2	2.90313e+07
demethyl pinusolide	0.974834	C20H28O4	331.192	573.441	1.97196	neg	[M-H]-	287.199819;331.191617;244.146236;288.207568;332.192423	level3	2.90281e+07
Depsidellin C	0.653843	C34H42O8	577.286	253.541	0.75271	neg	[M-H]-	531.277381;71.013764;101.024965;89.024513;399.233761	level3	2.89812e+07
(7aS,11aS,11bS)-7,7a,8,9,10,11,11a,11b-octahydro-11b-hydroxy-alpha,alpha,8,8,11a-pentamethyl-6H-naphth[1,2-d]azepine-4-methanol|triptotin J	0.999323	C20H31NO2	318.239	558.044	3.78475	pos	[M+H]+	318.236112;319.240691;108.051697;107.049002;81.070164	level3	2.89692e+07
erythro-2-Hydroxy-2-(1-hydroxyethyl)-4-methyl-pentanoic acid|erythro-2-Hydroxy-2-(1-hydroxyethyl)-4-methylpentanoic acid	0.910086	C8H16O4	177.113	871.26	0.419499	pos	[M+H]+	177.113499;136.086659;178.107869;95.060521;137.09451	level3	2.89297e+07
furost-25(27)-ene-1beta,2beta,3beta,4beta,5beta,6beta,7alpha,22,26-nonaol 26-O-beta-D-glucopyranoside	0.948548	C33H54O15	689.337	241.473	2.8925	neg	[M-H]-	689.330771;168.007029;125.023723;149.995639;76.594471	level3	2.88365e+07
14,15-bisnor-3,11E-kolavadien-13-one|ent-14,15-Dinor-3,11-clerodadien-13-one	0.864698	C18H28O	261.22	488.234	1.26284	pos	[M+H]+	261.220947;93.069958;243.211812;107.085094;121.10144	level3	2.88259e+07
3,6-di-O-p-coumaroyl-beta-D-fructofuranosyl 6-O-acetyl-alpha-D-glucopyranoside|3,6-Di-O-p-coumaroyl-??-D-fructofuranosyl 6-O-acetyl-??-D-glucopyranoside	0.886728	C32H36O16	675.193	46.2884	2.56114	neg	[M-H]-	191.056408;675.193892;327.085824;163.039141;173.044342	level3	2.88222e+07
7-ethenyl-1,4a,7-trimethyl-3,4,6,8,8a,9,10,10a-octahydro-2H-phenanthrene-1-carboxylic acid	0.951004	C20H30O2	320.255	533.095	0.0906154	pos	[M+NH4]+	320.255846;321.255756;147.044014;95.086075;330.569144	level2	2.88194e+07
magnolol	0.780704	C18H18O2	289.122	38.4417	15.861	pos	[M+Na]+	289.117351;211.085282;271.105995;182.084657;241.09531	level2	2.87269e+07
methyl 2-amino-3-hydroxy-4-methoxybenzoate	0.692258	C9H11NO4	196.061	45.2908	1.43546	neg	[M-H]-	94.029932;122.06067;196.06226;124.039608;152.071864	level3	2.86658e+07
Perlolyrine	0.928522	C16H12N2O2	265.101	135.689	16.1418	pos	[M+H]+	265.094492;206.084749;247.085598;266.09725;207.090043	level2	2.86628e+07
3'-Sinapoyl-6-feruloylsucrose|6-O-feruloyl-3'-O-sinapoylsucrose	0.915441	C33H40O18	723.209	132.107	6.18527	neg	[M-H]-	205.048799;723.223146;190.027295;175.039412;517.159627	level3	2.85777e+07
Methylsticin	0.997827	C15H14O5	257.08	274.897	0.739074	pos	M+H-H2O	257.079835;242.058945;214.061056;258.082088;145.10104	level1	2.85469e+07
Pawhuskin A	0.736395	C29H36O4	449.265	657.958	0.732976	pos	[M+H]+	449.27052;155.011181;137.000099;313.272764;98.983473	level3	2.85053e+07
4-ethoxy-3-methoxybenzoic acid	0.907244	C10H12O4	197.08	41.7645	1.23865	pos	[M+H]+	151.038049;73.028024;179.070541;125.058793;197.080645	level3	2.84568e+07
penicimonoterpene	0.894679	C12H20O5	243.124	165.958	1.92845	neg	[M-H]-	59.013794;243.124096;181.122327;183.1015;139.112447	level3	2.82959e+07
(1S,2S,4R)-2-hydroxy-1,8-cineole beta-D-apiofuranosyl-(1->6)-beta-D-glucopyranoside	0.910259	C21H36O11	463.219	137.093	1.89454	neg	[M-H]-	463.219589;71.013653;101.024728;161.045912;331.17754	level3	2.82476e+07
(9Z,16Z)-9,16-Octadecadiene-12,14-diynal	0.830398	C18H24O	257.19	433.743	2.27307	pos	[M+H]+	257.187918;199.149066;239.178687;145.100949;159.117029	level3	2.82475e+07
Pinocembrin	0.99926	C15H12O4	257.08	359.987	0.867125	pos	M+H	257.079709;153.017511;131.048134;103.053835;258.082235	level1	2.82274e+07
ZINGERONE	0.882037	C11H14O3	195.101	139.887	0.697524	pos	[M+H]+	195.104949;177.090242;121.100914;135.080227;149.095811	level3	2.82032e+07
Luteolin	0.987108	C15H10O6	285.04	483.101	1.37874	neg	[M-H]-	285.039186;257.043847;241.048823;217.049885;213.057203	level2	2.81678e+07
CTK1D0167	0.761129	C16H18N2O4	303.133	44.8662	0.561923	pos	[M+H]+	303.13086;285.123408;195.090211;207.089982;225.101361	level3	2.80862e+07
(3S,5R,6R,7E,9S)-megastigm-7-ene-3,5,6,9-tetrol 3-(beta-D-glucopyranoside)	0.803234	C18H30O10	405.177	117.281	2.45906	neg	[M-H]-	225.112899;405.177616;59.013735;181.122231;89.024466	level3	2.80451e+07
conicaol B|trans-2-(4-hydroxy-3-methoxybenzoyl)-3-(3',4'-dimethoxybenzyl)butyrolactone	0.863664	C21H22O7	387.143	193.043	0.789481	pos	[M+H]+	387.145604;191.068632;137.059974;343.114357;123.044046	level3	2.79063e+07
3,4-Dimethoxybenzaldehyde	0.918477	C9H10O3	167.07	114.963	2.00031	pos	[M+H]+	167.068835;43.017676;93.069896;123.043762;121.10116	level2	2.78548e+07
Caryophyllene epoxide	0.978678	C15H24O	221.189	314.223	0.304679	pos	[M+H]+	221.188461;203.178809;147.116402;95.085687;81.069894	level2	2.77958e+07
(1R*,4R*,8S*,10R*)-1,4-epoxy-1-methoxy-8-acetoxy-10-hydroxy-13-phenoxy-m-carboxaldehyde-germacra-5E,7(11)-dien-6,12-olide	0.756544	C25H28O9	471.166	297.269	0.216898	neg	[M-H]-	145.029497;471.170535;307.080355;163.076793;148.052601	level3	2.77606e+07
asperamide B	0.661431	C43H79NO9	754.58	867.307	0.312947	pos	[M+H]+	736.565829;276.267374;574.512558;556.502591;574.49603	level3	2.75804e+07
14-(S)-hydroxypaspalinine|14-hydroxypaspalinine	0.765202	C27H31NO5	450.223	282.411	1.86667	pos	[M+H]+	184.07372;104.106732;450.221459;86.096195;124.999944	level3	2.75558e+07
Costinsaeure-methylester	0.81754	C16H24O2	249.184	309.519	1.99806	pos	[M+H]+	249.182816;121.101272;93.069881;105.033366;107.084943	level3	2.75205e+07
Bullatine B	0.882131	C24H39NO6	460.269	456.829	1.40809	pos	M+Na	119.085704;135.080505;415.21088;107.084888;69.033403	level1	2.72953e+07
1-Acetoxyprotolichesteric acid|13-acetoxyprotolichesterinic acid	0.834709	C21H34O6	383.241	215.093	1.67824	pos	[M+H]+	383.243928;81.069362;159.117138;119.085926;121.101286	level3	2.7283e+07
Salvigenin	0.840621	C18H16O6	329.102	260.385	1.9923	pos	M+H	329.102403;299.05473;268.072396;285.076872;314.079838	level1	2.72077e+07
1,10-Dioxotayloriane	0.879093	C15H24O2	237.184	141.925	0.26672	pos	[M+H]+	151.11097;237.184399;133.100953;81.069852;219.172843	level3	2.71873e+07
xi-8-Hydroxyhexadecanedioic acid	0.696683	C16H30O5	301.202	310.08	0.231879	neg	[M-H]-	301.203835;221.192006;265.180494;283.188521;87.008731	level3	2.71699e+07
Osmanthuside B	0.748915	C29H36O13	591.209	261.776	3.35585	neg	[M-H]-	591.205305;555.189338;116.927823;100.933603;395.149303	level3	2.70668e+07
3,5,6,7,8,3',4'-Heptamethoxyflavone	1	C22H24O9	455.13	82.8575	0.110716	pos	[M+Na]+	455.133597;456.20001;50.571025;123.044259;70.065182	level2	2.6973e+07
Gallicynoic acid D	0.942305	C18H30O4	309.207	458.651	0.0922399	neg	[M-H]-	309.208877;291.195986;59.013671;109.065066;71.013722	level3	2.69433e+07
phenylacetaldehyde	0.730591	C8H8O	119.05	100.017	0.00321082	neg	[M-H]-	119.050441;59.013822;71.013789;101.023751;89.024537	level3	2.69036e+07
18-Deoxycytochalasin H	0.620281	C30H39NO4	476.277	560.686	0.632036	neg	[M-H]-	476.280922;78.958502;171.005447;152.996636;279.23276	level3	2.67957e+07
Prosopine	0.894896	C18H37NO3	316.284	429.561	1.33817	pos	[M+H]+	316.282701;87.043607;256.260755;88.0752;102.09144	level3	2.67325e+07
papyriferic acid	0.997068	C35H56O8	603.389	448.51	1.50984	neg	[M-H]-	603.380955;585.382493;67.044094;604.394916;131.033979	level3	2.67193e+07
(1S,4S,5R,10S,13S,17S,19S,20R)-10-hydroxy-4,5,9,9,13,19,20-heptamethyl-24-oxahexacyclo[15.5.2.0¹,¹⁸.0⁴,¹⁷.0⁵,¹⁴.0⁸,¹³]tetracos-15-en-23-one	0.880762	C30H46O3	455.351	472.01	2.50909	pos	[M+H]+	455.307413;409.351485;95.08607;201.164549;109.101358	level2	2.66203e+07
2,4-Quinolinediol	0.97082	C9H7NO2	162.054	36.1183	1.47516	pos	[M+H]+	162.054957;120.044383;163.037679;144.043203;135.044692	level3	2.65898e+07
2alpha,3beta-dihydroxy-30-noroleana-12,20(29)-dien-28-oic acid|2??,3??-Dihydroxy-30-noroleana-12,20(29)-dien-28-oic acid	0.830676	C29H44O4	457.323	390.64	15.2792	pos	[M+H]+	457.332655;205.15742;187.147737;439.324492;119.085513	level3	2.64583e+07
norleptosphol C	0.859449	C18H30O5	327.216	368.527	0.280257	pos	[M+H]+	291.192757;309.206153;81.06993;189.110953;125.095223	level3	2.62941e+07
Caperatic acid	0.602829	C21H38O7	401.254	265.057	0.763821	neg	[M-H]-	327.220121;100.933515;171.101679;283.193375;91.040118	level3	2.62389e+07
3'-alpha-L-rhamnopyranoside|Syringalide 3'-??-L-rhamnopyranoside|syringalide A 3'-alpha-L-rhamnopyranoside|syringalide A 3'-alpha-rhamnopyranoside|syringalide A 3'-O-alpha-L-rhamnopyranoside	0.735412	C29H36O14	607.201	193.626	2.6344	neg	[M-H]-	273.07517;167.033789;607.204963;125.023589;123.045682	level3	2.62122e+07
Leueantine C	0.671277	C33H45NO6	552.329	304.577	0.876834	pos	[M+H]+	184.073484;552.335159;104.10665;86.096094;124.9997	level3	2.61748e+07
methyl 10(S*)-acetoxy-6(Z),8(E),12(Z),15(Z)-octadecatetraenoate	0.905322	C21H32O4	349.236	374.115	0.820614	pos	[M+H]+	349.236234;275.201263;81.069923;107.084611;93.069626	level3	2.59444e+07
(+)-plagiochiline X	0.922294	C15H20O	217.158	284.513	1.35257	pos	[M+H]+	217.157835;175.11069;159.116959;157.100587;105.069435	level3	2.58857e+07
petiolin D	0.706357	C30H42O4	467.314	564.723	1.00889	pos	[M+H]+	423.285751;467.321188;123.079625;421.307383;119.085385	level3	2.58053e+07
β-Gentiobiose	0.995059	C12H22O11	381.078	31.8726	0.530023	pos	[M+K]+	381.083028;201.017389;382.076109;277.995954;126.833066	level2	2.57443e+07
methyl (13E)-6alpha,18-dihydroxycleroda-3,13-dien-15-oate	0.989881	C21H34O4	351.251	409.637	2.08573	pos	[M+H]+	351.210828;259.204476;147.116358;93.069689;135.116351	level3	2.57155e+07
7-[4,5-dihydroxy-6-(hydroxymethyl)-3-[(2S,3R,4R,5R,6S)-3,4,5-trihydroxy-6-methyloxan-2-yl]oxyoxan-2-yl]oxy-5-hydroxy-2-(4-hydroxyphenyl)-2,3-dihydrochromen-4-one	0.746966	C27H32O14	581.185	149.555	2.51903	pos	[M+H]+	107.048993;419.136981;353.098606;341.101233;235.059363	level2	2.56723e+07
2-phenylethyl 6-O-(beta-D-glucopyranosyl)-beta-D-glucopyranoside|2-phenylethyl 6-O-beta-D-glucopyranosyl-beta-D-glucopyranoside|2-phenylethyl beta-gentiobioside|phenethyl alcohol beta-D-glucopyranosyl(1'- >6)-beta-D-O-glucopyranoside|phenethyl alcohol beta-D-glucopyranosyl-(1->6)-beta-D-glucopyranoside|phenethyl alcohol beta-gentiobioside	0.718313	C20H30O11	445.171	54.1452	1.05581	neg	[M-H]-	59.013667;89.02433;71.013653;101.024719;179.056651	level3	2.56658e+07
MLS002701748	0.827774	C21H20O7	385.128	251.375	2.08179	pos	[M+H]+	385.124099;357.130965;181.048107;327.119639;325.105208	level3	2.56038e+07
Metyrosine	0.922622	C10H13NO3	196.096	35.3812	0.226843	pos	[M+H]+	196.0948;179.070355;96.044163;178.085098;151.038207	level2	2.55469e+07
sinapoyltyramine	0.693167	C19H21NO5	344.149	183.183	1.79059	pos	[M+H]+	344.146085;107.048986;221.081677;207.064856;327.119468	level3	2.54494e+07
(4aS,6aS,6bR,9R,10R,11R,12aR)-10,11-dihydroxy-9-(hydroxymethyl)-2,2,6a,6b,9,12a-hexamethyl-1,3,4,5,6,6a,7,8,8a,10,11,12,13,14b-tetradecahydropicene-4a-carboxylic acid	0.9643	C30H48O5	489.357	283.305	0.0580263	pos	[M+H]+	205.157244;201.163874;147.116455;407.330191;425.343052	level2	2.54244e+07
Rosamultin	0.910101	C36H58O10	668.437	294.678	2.30548	pos	[M+NH4]+	201.164051;205.157199;453.331486;407.330316;425.341797	level2	2.53967e+07
3beta,14beta,15beta-trihydroxypregn-5-en-20-one 3-O-beta-D-glucopyranosyl-(1->2)-beta-D-glucopyranoside|cynaforroside J	0.874658	C33H52O14	671.329	307.784	0.557391	neg	[M-H]-	671.33498;168.007043;125.023706;167.033949;149.99557	level3	2.53921e+07
Andrachamine	0.614385	C15H31NO2	258.242	572.736	1.05035	pos	[M+H]+	258.24152;230.246481;240.229839;57.069695;72.044202	level3	2.53757e+07
Tocopherol Impurity 1	0.962121	C29H48O2	429.371	888.86	0.000849899	pos	[M+H]+	165.09081;429.372192;430.377408;163.110318;57.06965	level3	2.53708e+07
2-Phenylethanol	0.951414	C8H10O	105.07	284.342	4.07857	pos	[M+H-H2O]+	105.069495;79.054027;103.05394;95.049286;106.073139	level2	2.53687e+07
Thujyl 19-trachylobanoate	0.924937	C30H46O2	439.356	682.201	0.481263	pos	[M+H]+	95.085761;137.132724;81.069868;440.356782;394.357307	level2	2.5358e+07
isolinderanolide B	0.960486	C18H30O3	293.212	577.266	1.24351	neg	[M-H]-	293.210443;113.097107;195.138623;167.107993;57.034357	level3	2.53524e+07
1,6-Dimethoxy-9H-carbazole-3-carboxaldehyde	0.702674	C15H13NO3	256.096	208.893	1.51609	pos	[M+H]+	228.102066;182.096416;210.091072;165.070328;256.098271	level2	2.53503e+07
3,19-Dihydroxyurs-12-ene-23,28-dioic acid	0.852511	C30H46O6	503.334	457.862	1.33752	pos	[M+H]+	439.32174;457.33335;119.085362;173.132884;187.147249	level2	2.53219e+07
SCHEMBL10053040	0.628707	C28H40N4O6	527.286	546.209	1.37921	neg	[M-H]-	527.287436;277.217153;113.023726;85.029697;71.013757	level3	2.52258e+07
C-Veratroylglycol	0.813369	C10H12O5	211.061	84.4089	0.587136	neg	[M-H]-	211.059512;193.049752;181.049203;122.036488;134.037154	level3	2.52108e+07
3',3'',3''',4',4''',5,5'',7,7''-Nonahydroxy-3,8''-biflavanone	0.829337	C30H22O13	591.109	34.4669	5.23205	pos	[M+H]+	439.103009;153.017773;591.112243;573.09547;421.090279	level3	2.52003e+07
Ipecosidic acid	0.850024	C26H33NO12	552.203	38.918	3.73147	pos	[M+H]+	552.21098;390.158037;373.128376;355.114395;372.146003	level3	2.51917e+07
Tricornoside B	0.821576	C27H32O14	579.172	58.2006	3.36575	neg	[M-H]-	249.077581;96.960623;579.134634;250.080781;289.072916	level3	2.51855e+07
lanceaefolic acid	0.707532	C12H12O5	235.06	56.1856	2.14988	neg	[M-H]-	80.964917;176.047934;191.069699;235.062776;236.023438	level3	2.51676e+07
14, 15-Epoxy-3-hydroxy-1, 6, 10, 14-phytatetraen-13-one|14,15-epoxy-13-oxo-14,15-dihydrogeranyllinalol	0.914816	C20H32O3	321.241	308.897	2.91768	pos	[M+H]+	303.23153;321.241666;81.070064;95.08483;135.116133	level3	2.5098e+07
3,4-trans-3-methyl-4-[(5-hydroxy-3,4-methylenedioxyphenyl)(3,4,5-trimethoxyphenyl)methyl]butyrolactone	0.796189	C22H24O8	417.152	106.61	1.72745	pos	[M+H]+	417.154674;167.068675;181.047931;315.050568;399.070499	level3	2.50901e+07
Deoxypodorhizone	0.930539	C22H24O7	401.157	69.2966	0.990885	pos	[M+H]+	401.156218;107.04875;353.105274;247.061573;205.048095	level3	2.5074e+07
comazaphilone E	0.78034	C22H24O8	417.154	220.748	1.92036	pos	[M+H]+	167.070909;417.151201;181.050592;416.348146;217.083884	level3	2.50382e+07
(2R,3R)-4',7-dihydroxy-2',5-dimethoxydihydroflavonol	0.866209	C17H16O7	331.082	276.413	0.941572	neg	[M-H]-	331.083657;207.029648;313.069428;179.034251;219.028813	level3	2.50238e+07
p-Hydroxybenzaldehyde	1	C7H6O2	121.029	52.2326	2.46155	neg	[M-H]-	121.029837;122.022966;77.039733;93.034467;94.030018	level2	2.49612e+07
3-oxolup-20(29)-ene-27,28-dioic acid|Gouanic acid	0.766253	C30H44O5	485.326	355.574	0.996781	pos	[M+H]+	485.331963;107.048448;275.128501;439.319693;203.143019	level3	2.49546e+07
SCHEMBL12145395	0.999815	C30H44O5	483.312	580.904	2.41627	neg	[M-H]-	483.30673;453.307035;53.701968;484.312729;447.089554	level3	2.49257e+07
.epsilon.-Tocopherol	0.650294	C28H42O2	411.324	654.337	3.25501	pos	[M+H]+	189.164278;411.321942;177.163915;83.08501;121.101043	level3	2.4859e+07
Pluchidione	0.91792	C13H18O3	223.132	359.901	1.84172	pos	[M+H]+	223.131858;194.093063;83.012526;121.101183;224.135715	level3	2.47962e+07
(3R)-4,6-dimethoxy-3-[5-methoxy-4-oxo-6-{(1E)-prop-1-en-1-yl}-4-H-pyran-3-yl]-2-benzofuran-1(3H)one|methoxyvermistatin	0.664171	C19H18O7	357.098	231.62	0.819567	neg	[M-H]-	357.098612;312.060618;251.056718;206.021486;327.084928	level3	2.47713e+07
poliothyrsoside	0.646271	C14H18O9	329.088	39.0973	1.7544	neg	[M-H]-	167.033877;123.04582;165.056439;125.023669;209.046105	level3	2.46232e+07
trans-4-Coumaric acid	0.989239	C9H8O3	165.054	43.5694	0.645997	pos	[M+H]+	147.044063;119.048202;165.055233;91.054228;123.043642	level2	2.45813e+07
Ac-Dehydrofalcarinolone	0.965937	C19H22O3	297.153	557.756	1.12164	neg	[M-H]-	297.154438;183.011941;184.020432;191.033885;298.153031	level3	2.45547e+07
isomariesiic acid	0.843598	C30H42O4	467.315	400.37	0.235307	pos	[M+H]+	467.318542;421.305529;201.163029;119.08515;107.085744	level3	2.44619e+07
Me ester-(S,Z)-8-Hydroxy-2-decene-4,6-diynoic acid	0.843398	C11H12O3	193.086	87.9319	2.73709	pos	[M+H]+	161.059395;133.0644;105.069342;193.158491;91.054307	level3	2.44533e+07
Dihydrojoubertiamin|dihydrojoubertiamine	0.947519	C16H23NO2	262.179	172.998	1.51073	pos	[M+H]+	262.181255;176.141498;87.043633;263.183828;177.147486	level3	2.44202e+07
6,7-Dehydroporicoic acid H	0.662484	C31H46O5	499.343	580.543	4.17487	pos	[M+H]+	455.308606;499.342477;421.307368;439.324408;123.079613	level3	2.44161e+07
6,12-bis(3,4-dihydroxyphenyl)-8,13-dihydroxy-3,11-dioxatricyclo[8.4.0.0(2),]tetradeca-1(10),2(7),8-trien-4-one	0.786163	C24H20O9	451.102	239.268	3.14253	neg	[M-H]-	407.112881;451.101989;301.071295;217.048937;259.062381	level3	2.42984e+07
negundonorin B|rel-(2R,3S)-28-norursa-12,17,19,21-tetraen-2,3-diol	0.648367	C29H42O2	423.325	507.041	0.742206	pos	[M+H]+	423.328005;187.148378;201.164658;95.085065;189.161936	level3	2.42938e+07
Deoxylimonin	0.999928	C26H30O7	455.203	208.654	0.0919897	pos	M+H	455.203536;147.043819;50.579228;456.21123;304.089538	level1	2.42474e+07
MEGxp0_000515	0.845812	C23H32O11	483.181	212.457	12.3373	neg	[M-H]-	483.190804;152.011042;108.021526;109.029719;153.019331	level3	2.41802e+07
(+)-protopraesorediosic acid|(2R,3S)-Protopraesorediosic acid	0.90127	C21H34O6	383.242	358.882	0.685963	pos	[M+H]+	107.048625;95.085791;119.085408;383.109771;81.06996	level3	2.41045e+07
Lactapiperanol D	0.661108	C18H28O5	325.201	250.967	2.41263	pos	[M+H]+	133.02771;325.203052;137.096414;125.095593;97.100703	level3	2.40045e+07
23-cis-p-coumaroyloxy-2alpha,3alpha-dihydroxyolean-12-en-28-oic acid	0.999398	C39H54O7	633.379	602.481	0.486847	neg	[M-H]-	633.379981;161.024165;70.376699;634.375477;145.029044	level3	2.39018e+07
(22E, 24x)-Ergosta-4,6,8,22-tetraen-3-one	0.816606	C28H40O	393.314	840.886	0.637001	pos	[M+H]+	393.316802;268.182694;69.069996;253.157468;394.317941	level2	2.3891e+07
Dorsteniol	0.786513	C14H14O5	263.091	251.95	1.23087	pos	[M+H]+	187.073893;263.0907;159.080414;219.102127;131.085552	level2	2.38829e+07
2-Methoxy-4-oxo-6-phenyl-hexa-2,5-dienoic acid methyl ester	0.814615	C14H14O4	247.096	194.36	1.27157	pos	[M+H]+	215.068109;187.074383;247.094878;229.084957;201.088959	level3	2.38229e+07
17,24-epoxy-20alpha,25-dihydroxy-21-norbaccharan-3-one	0.713786	C29H48O4	461.361	535.896	2.08615	pos	[M+H]+	425.342088;461.364713;443.352878;201.16368;407.330374	level3	2.38208e+07
SUBERIC ACID	0.923302	C8H14O4	175.097	780.844	0.772683	pos	[M+H]+	175.096807;134.070687;176.093832;148.087623;135.078653	level2	2.37103e+07
5'-acetoxy-agriantholide	0.744181	C22H26O9	433.15	165.492	0.880606	neg	[M-H]-	433.153155;373.129536;358.105325;418.128059;166.027573	level3	2.36855e+07
Dihydro-5-(5-hydroxy-6-dodecenyl)-2(3H)-furanone|piliferolide B	0.798072	C16H28O3	269.21	337.62	1.58318	pos	[M+H]+	251.200539;95.085793;81.069864;109.101032;121.100934	level3	2.36825e+07
N-Fructosyl pyroglutamate	0.839748	C11H17NO8	290.088	50.8407	0.130985	neg	[M-H]-	128.035017;200.055988;290.083996;170.045461;155.950464	level2	2.36744e+07
Hypochoeroside K	0.987455	C21H34O7	397.225	639.057	1.67893	neg	[M-H]-	397.230297;96.959428;79.957342;122.975305;398.228381	level3	2.36347e+07
(-)-Gallocatechin	0.927455	C15H14O7	307.08	234.877	0.741742	pos	M+H	163.037819;307.077571;81.033398;109.027623;69.033534	level1	2.35721e+07
alpha-Linolenic acid	0.982693	C18H30O2	279.231	470.93	1.75711	pos	[M+H]+	279.229547;81.069306;95.084992;67.053821;109.101398	level2	2.35674e+07
Xanthoxylol	0.860699	C20H20O6	357.132	250.903	0.114996	pos	[M+H]+	357.130659;327.124659;107.048701;137.059495;203.070945	level2	2.3567e+07
rosiridoside A	0.881795	C15H26O6	303.18	604.635	1.60999	pos	[M+H]+	303.048453;153.004117;107.03704;145.555162;73.314239	level3	2.33997e+07
Linolenic acid	0.999766	C18H30O2	277.217	575.416	0.0229312	neg	[M-H]-	277.216046;116.927646;277.976621;191.975453;59.013771	level2	2.33896e+07
2-ETHYLPHENOL	0.965428	C8H10O	123.08	132.209	0.731577	pos	[M+H]+	123.079801;95.084945;67.053764;81.069241;43.017655	level3	2.33751e+07
2alpha,4alpha,5alpha,7beta,9alpha,10beta,13alpha,15,20-nonahydroxy-1(15->1)abeotaxa-11-ene|taxuyunnamine S	0.887423	C20H34O9	417.212	158.838	1.78476	neg	[M-H]-	371.207691;417.215251;59.013613;101.024679;71.013672	level3	2.33295e+07
5-methoxyphthalide 7-O-beta-D-xylopyranosyl-(1->6)-beta-D-glucopyranoside|5-Methoxyphthalide 7-O-??-xylopyranosyl-(1閳ユ◤鍌楀瀻6)-??-glucopyranoside	0.790753	C20H26O13	473.13	47.7318	2.28772	neg	[M-H]-	473.127795;165.05653;121.064986;87.008827;73.029491	level3	2.33e+07
MALIC ACID	0.768028	C4H6O5	133.014	151.553	0.381584	neg	[M-H]-	115.003401;133.014932;71.013787;72.992802;115.920697	level2	2.32665e+07
6beta-Hydroxyasiatic acid	0.871583	C30H48O6	549.344	409.363	1.53311	neg	[M-H]-	503.343704;549.316153;78.959153;121.029457;165.0181	level2	2.32518e+07
Coumarin + 1O + 1MeO, O-Hex-Hex	0.91877	C22H28O14	515.141	35.4764	1.95262	neg	[M-H]-	191.056494;515.135305;179.034184;323.076642;173.044556	level3	2.3235e+07
Sesaminol glucosyl-(1->2)-glucoside	0.876858	C32H38O17	693.197	512.784	0.0914458	neg	[M-H]-	693.192687;78.959205;116.927748;657.180598;181.908765	level3	2.31108e+07
6-Tuliposide B; 6-O-[(3S)-3,4-Dihydroxy-2-methylenebutanoyl]-D-glucose	0.940056	C11H18O9	295.101	47.527	0.399574	pos	[M+H]+	85.02824;69.033325;296.158403;97.028101;136.07496	level3	2.30966e+07
Beta-D-Galactose	0.815735	C6H12O6	179.056	31.7437	1.28031	neg	[M-H]-	59.013622;89.024316;71.013559;179.054149;135.065482	level2	2.30418e+07
(1S,4aR,6aS,6bR,9S,10R,11R,12aR,14bS)-1,10,11-trihydroxy-9-(hydroxymethyl)-2,2,6a,6b,9,12a-hexamethyl-1,3,4,5,6,6a,7,8,8a,10,11,12,13,14b-tetradecahydropicene-4a-carboxylic acid	0.948184	C30H48O6	505.351	342.692	0.562148	pos	[M+H]+	201.163757;423.325154;191.14424;505.279195;187.148272	level2	2.29626e+07
hydroxydihydrovermistatin	0.654639	C18H18O7	347.111	126.115	0.867798	pos	[M+H]+	107.048942;223.059665;329.102234;181.048034;347.114796	level3	2.29017e+07
Matairesinol	0.815661	C20H22O6	341.138	180.917	0.717886	pos	M+H-H2O	341.138921;309.113619;281.119169;187.073665;107.04862	level1	2.28982e+07
rel-Labd-12-en-15(16)-olid-7-one-8R-spiro-1閳ユ◣?-[2S-(2,4,5-trimethoxyphenyl)-3-cyclohexene]	0.707853	C33H44O6	535.312	231.779	0.283499	neg	[M-H]-	535.314044;273.074963;167.03356;373.258781;59.013647	level3	2.27828e+07
Norfuraneol	0.885305	C5H6O3	115.039	38.1193	3.64446	pos	[M+H]+	55.054182;69.06998;59.049268;71.085601;115.075213	level2	2.27819e+07
methyl-2beta-isovaleryloxy-delta-cadinene-15-oate	0.946405	C21H32O4	349.237	246.228	0.372259	pos	[M+H]+	349.237382;57.033213;81.070051;95.085818;93.069404	level3	2.27658e+07
MG(0:0/18:3(9Z,12Z,15Z)/0:0)	0.923855	C21H36O4	353.267	479.904	2.68221	pos	[M+H]+	261.220565;353.098703;81.070006;95.084864;67.054339	level3	2.27417e+07
Polytolypin	0.844202	C30H46O7	519.331	325.486	5.7424	pos	[M+H]+	519.334221;501.321155;483.310693;455.319839;173.133029	level3	2.27279e+07
1,2-Di-(9Z,12Z,15Z-octadecatrienoyl)-3-(Galactosyl-alpha-1-6-Galactosyl-beta-1)-glycerol	0.946991	C51H84O15	937.582	848.095	1.07039	pos	[M+H]+	937.575713;681.339318;938.580091;937.472349;659.363976	level3	2.27266e+07
Niga-ichigoside F1	0.806642	C36H58O11	711.395	249.143	1.01472	neg	M+HCOO	503.34209;711.39738;485.326963;665.383154;421.315657	level1	2.26986e+07
1-18:2-2-18:3-monogalactosyldiacylglycerol	0.730235	C45H76O10	777.563	806.053	20.3467	pos	[M+H]+	777.552795;777.47473;89.059604;521.298859;778.548749	level3	2.26909e+07
octadeca-6,9,12,15-tetraenoic acid	0.678103	C18H28O2	277.215	478.221	0.78246	pos	[M+H]+	277.217994;93.069352;81.069901;67.054289;260.113674	level3	2.2651e+07
Jiadifenin	0.726637	C16H18O8	339.106	99.4538	0.512287	pos	[M+H]+	177.054254;279.084156;339.106566;145.027713;321.096152	level3	2.25862e+07
(2'E,4'Z,8E)-Colneleic acid	0.849887	C18H30O3	295.226	356.325	1.01783	pos	[M+H]+	295.224775;277.213634;81.06937;95.085082;67.053902	level2	2.25643e+07
alpha-D-glucopyranosyl ester of 2alpha,3beta,19alpha,23-tetrahydroxy-12-ursen-28-oic acid	0.775618	C37H60O11	679.404	398.827	1.7219	neg	[M-H]-	471.340571;679.412383;633.398956;453.329427;78.959329	level3	2.25513e+07
Shogaol	0.902613	C17H24O3	277.179	498.796	1.02178	pos	M+H	137.059904;277.213481;138.062965;122.035796;93.069626	level1	2.23822e+07
(2R,3R,4S,5S,6R)-2-[(2E)-4-hydroxy-3,7-dimethylocta-2,6-dienoxy]-6-(hydroxymethyl)oxane-3,4,5-triol	1	C16H28O7	355.173	160.26	0.648592	pos	[M+Na]+	355.170292;356.179556;147.080155;163.03789;123.043468	level2	2.22905e+07
3,17-Dioxo-8beta-H-ent-labda-13z-en-15-saeuremethylester	0.875694	C21H32O4	349.236	506.525	1.34444	pos	[M+H]+	349.236203;275.201561;81.070083;119.085513;105.069471	level3	2.22791e+07
Hyperibone F	0.641424	C33H42O6	533.296	233.734	0.363983	neg	[M-H]-	533.29664;371.241586;59.256089;355.250994;353.234467	level3	2.22708e+07
cinchonain Ia	0.607294	C24H20O9	453.118	174.262	1.31363	pos	[M+H]+	191.033485;301.070301;343.083881;123.043666;137.023206	level3	2.22595e+07
2',4',6',2,3,4-hexamethoxychalcone|2,3,4,2',4',6'-Hexamethoxychalcone	0.811177	C21H24O7	389.158	220.638	1.31855	pos	[M+H]+	389.155753;181.048102;107.049135;209.078526;177.054122	level3	2.22336e+07
dihydrosantamarin	0.756208	C16H24O2	249.184	379.719	1.81979	pos	[M+H]+	137.059754;249.182622;231.171891;81.069992;203.179424	level3	2.21891e+07
β-Boswellic acid	0.999946	C30H48O3	455.352	681.888	0.670659	neg	M-H	455.351801;50.595361;456.356239;102.129555;249.914697	level1	2.2181e+07
stemoxazolidinone E	0.611199	C23H32N2O6	433.233	576.724	1.43004	pos	[M+H]+	261.220158;335.256255;119.085549;98.984442;81.069988	level3	2.21693e+07
D:A-Friedooleanan-24-oic acid, 1,3-dioxo-	0.999673	C30H46O4	469.331	570.742	2.88148	neg	[M-H]-	469.334215;451.319346;52.148528;470.336401;441.305521	level3	2.2114e+07
BETAINE	0.997141	C5H11NO2	118.086	911.51	0.485482	pos	[M+H]+	118.085945;59.072636;58.064919;119.089043;44.049403	level2	2.19929e+07
Ethyl 5-oxo-DL-prolinate	0.625713	C7H11NO3	158.08	38.6524	3.46272	pos	[M+H]+	70.065142;112.075564;158.081165;116.069911;140.070658	level3	2.19418e+07
(+-)-8-Hydroxy-octadec-11t-en-9-insaeure|(+-)-8-hydroxy-octadec-11t-en-9-ynoic acid|(S?)-8-Hydroxy-octadec-11t-en-9-insaeure|(S?)-8-hydroxy-octadec-11t-en-9-ynoic acid|8-Hydroxy-octadecen-(trans-11)-in-(9)-saeure|8-hydroxy-trans-11-octadecen-9-ynoic acid	0.975034	C18H30O3	295.226	274.593	0.652824	pos	[M+H]+	277.212928;295.224812;69.069978;81.070087;121.101212	level3	2.19112e+07
7,8-dihydrooxepinoeriodictyol	0.69582	C20H18O6	355.117	254.845	0.690502	pos	[M+H]+	201.054902;355.113924;137.059888;305.078864;337.107407	level3	2.18864e+07
MCULE-6091401335	0.935521	C15H22O2	235.169	315.842	1.71843	pos	[M+H]+	235.167505;217.157859;147.116626;133.101311;107.084951	level3	2.18567e+07
Annosquamosin F	0.900263	C21H34O5	367.247	267.918	0.465925	pos	[M+H]+	367.247427;275.201456;81.070068;67.054401;349.23611	level3	2.17895e+07
7-Hydroxy-2-oxo-2H-chromen-8-carbonsaeure|7-hydroxy-2-oxo-2H-chromene-8-carboxylic acid|7-Hydroxy-8-carboxy-cumarin|8-carboxy-7-hydroxycoumarin	0.789943	C10H6O5	205.014	96.478	1.38278	neg	[M-H]-	117.034064;161.024057;205.013575;118.037423;111.008742	level3	2.17839e+07
17-carboxymethylgrindelic acid	0.845479	C21H32O5	365.232	213.652	2.5502	pos	[M+H]+	365.228687;347.223969;189.16441;159.116753;145.100736	level3	2.17833e+07
Atractyloside A	0.929916	C21H36O10	493.227	248.671	1.35291	neg	[M+FA]-	447.217443;89.024457;59.013742;71.013757;149.04528	level2	2.17677e+07
SCHEMBL9779205	0.741902	C13H20O3	225.143	144.483	23.3407	pos	[M+H]+	149.096248;121.101335;189.127352;137.096526;139.110741	level3	2.17208e+07
14,18-dihydroxy-13-methoxy-8,11,13-podocarpatriene	0.965567	C18H26O3	291.194	452.259	2.39298	pos	[M+H]+	273.185736;291.193518;123.043847;147.080368;135.080524	level3	2.17196e+07
3,4-Dihydroxyphenacyl caffeate	0.694978	C17H14O7	331.081	134.954	1.69172	pos	[M+H]+	163.03772;331.081597;195.027942;169.048292;151.037694	level2	2.15949e+07
Mudanpioside A	0.620898	C31H34O13	613.189	56.5866	1.15472	neg	[M-H]-	245.091924;613.193126;203.08203;98.024252;227.083151	level3	2.15566e+07
Rotundic acid	0.959891	C30H48O5	471.345	283.044	1.55951	pos	M+H-H2O	205.157263;201.16381;147.116271;187.147655;407.331366	level1	2.15555e+07
Isopeonol	0.928161	C9H10O3	167.07	133.898	1.60007	pos	[M+H]+	167.06886;123.043768;43.017663;124.051161;78.046328	level2	2.14431e+07
Yama-Ninjin 1	0.615788	C21H22O8	403.137	283.772	1.86214	pos	[M+H]+	123.043485;277.107153;113.060037;235.097434;95.049076	level3	2.14359e+07
5,6-Dimethoxydihydrosterigmatocystin	0.791409	C20H18O8	385.093	210.678	1.98256	neg	[M-H]-	385.096349;96.969883;261.041894;167.033786;189.056284	level3	2.14316e+07
SCHEMBL2120658	0.740234	C13H16O6	269.101	62.6165	1.36806	pos	[M+H]+	177.054104;145.027632;117.033478;269.125899;149.058905	level3	2.14014e+07
Arachidonic Acid (peroxide free)	0.956783	C20H32O2	305.247	304.54	0.531985	pos	[M+H]+	305.244929;149.131085;81.070104;107.084931;95.084902	level2	2.12745e+07
(2S)-2-<2(6methoxy)-naphthyl>propionyl beta-D-glucopyranoside	0.925312	C22H24O9	433.147	95.4388	1.78817	pos	[M+H]+	433.145153;271.05671;125.060163;107.048925;215.1055	level3	2.1259e+07
Atractylenolide II	0.96819	C15H20O2	233.153	242.707	0.572449	pos	[M+H]+	233.154539;119.085698;215.143716;187.147983;81.069236	level2	2.12458e+07
(-)-Cassine	1	C18H35NO2	298.274	735.413	0.136126	pos	[M+H]+	57.070015;299.276237;81.06991;71.085386;69.069955	level3	2.12358e+07
everlastoside C	0.903044	C16H30O10	381.176	63.5957	0.494444	neg	[M-H]-	381.180718;249.134344;59.013717;101.024777;71.013713	level3	2.12157e+07
Dioxypicolinsaure	0.634488	C6H5NO4	154.019	38.3441	29.8255	neg	[M-H]-	110.024216;154.013518;82.029765;111.008888;80.965619	level3	2.12073e+07
CARVONE	0.932576	C10H14O	151.111	87.83	0.63381	pos	[M+H]+	151.111417;133.101386;81.069326;107.084948;123.079926	level3	2.11765e+07
MCULE-1111304263	0.989291	C21H34O6	381.232	777.637	2.36195	neg	[M-H]-	381.234566;96.959503;79.957319;116.927475;205.15905	level3	2.11534e+07
Verbenalol	0.767423	C11H14O5	227.091	56.1619	0.800543	pos	[M+H]+	181.048176;155.069404;73.028336;227.09271;140.046978	level3	2.11249e+07
Sterequinone G	0.741708	C20H18O4	323.127	139.969	0.437919	pos	[M+H]+	323.129602;291.103061;137.059593;161.059029;199.074193	level3	2.11152e+07
(2S,5R,8R,9S,10R)-2-hydroperoxy-ent-clerod-3,13-dien-15-oic acid methyl ester	0.714263	C21H34O4	351.252	371.555	1.33666	pos	[M+H]+	351.258273;259.204198;147.116213;133.100817;161.132403	level3	2.10809e+07
1,2,3,4-Tetrahydronaphthalene	0.999687	C10H12	133.101	312.568	2.45984	pos	[M+H]+	133.101325;105.0695;91.053496;134.10449;69.070026	level3	2.10749e+07
6-Geranylnaringenin	0.652948	C25H28O5	407.191	99.6225	1.76476	neg	[M-H]-	243.123776;407.191679;225.112915;334.008806;207.10116	level2	2.10107e+07
icariside G1	0.754178	C17H32O10	395.192	51.6737	4.41491	neg	[M-H]-	395.185718;349.190045;180.067739;59.013711;89.02442	level3	2.09296e+07
Pentenocin B	0.827666	C7H10O4	157.05	64.4967	3.56105	neg	[M-H]-	113.061153;157.050374;59.013731;41.998269;114.031132	level3	2.09132e+07
(20R)-15alpha-hydroxy-8beta,9alpha,14alpha,17alpha-pregn-4-en-3-one 20-O-beta-D-glucopyranoside	0.65646	C27H42O9	511.287	339.94	4.28602	pos	[M+H]+	511.289505;139.039371;349.235567;275.200806;81.06994	level3	2.09011e+07
Phytosphingosine (not validated, isomer of 1697)	0.787786	C18H39NO3	318.3	481.971	2.92115	pos	[M+H]+	318.297307;270.277189;88.075063;74.059666;56.049453	level2	2.08334e+07
Zamanic acid	0.69096	C39H54O6	619.398	642.668	0.142927	pos	[M+H]+	147.043565;437.340228;203.178727;165.054513;189.16442	level3	2.07029e+07
Phillygenin	0.71788	C21H24O6	373.163	330.392	3.45358	pos	[M+H]+	107.048971;373.163437;207.064937;181.048043;165.054971	level3	2.06577e+07
Benzene-1,2,4-triol	0.784515	C6H6O3	125.024	39.0973	2.81478	neg	[M-H]-	125.023671;97.029499;69.034816;81.034498;83.0139	level2	2.06573e+07
methyl multijuguinate	0.821547	C11H15NO3	210.112	42.2718	1.69873	pos	[M+H]+	210.112707;96.044659;69.069899;73.064601;136.075048	level3	2.06524e+07
7-Acetoxy-6-methoxycoumarin	0.872794	C12H10O5	235.059	42.0189	1.66322	pos	[M+H]+	235.059288;193.048986;207.064904;190.061304;191.068365	level2	2.0619e+07
Procyanidin C1	0.744117	C45H38O18	867.207	44.4276	2.14916	pos	M+H	127.038722;247.061724;245.042039;163.039607;123.043419	level1	2.06077e+07
10-Dehydrogardenoside	0.653906	C17H22O11	401.109	63.4628	2.67855	neg	[M-H]-	125.02361;239.054056;401.105606;121.029665;135.04463	level3	2.05171e+07
Butane-1,2,3,4-tetrol	0.934124	C4H10O4	121.052	799.004	2.46514	neg	[M-H]-	121.052232;94.040941;65.998334;122.03649;67.030265	level3	2.0516e+07
Tricycloalternarene 1b	0.890057	C21H32O4	349.236	483.814	0.38804	pos	[M+H]+	219.172901;349.236116;57.033422;93.069944;119.08575	level3	2.04911e+07
Ferulic Acid	0.961226	C10H10O4	193.05	96.3551	1.32388	neg	[M-H]-	134.037222;178.026436;193.049868;149.06084;106.042824	level2	2.04775e+07
Butyl isobutyl phthalate	0.998298	C16H22O4	301.14	595.594	0.458506	pos	M+Na	301.138991;286.04494;302.145394;107.049073;273.039679	level1	2.04429e+07
Ethyl 3-hydroxybutyrate	0.955771	C6H12O3	131.071	81.0683	2.13491	neg	[M-H]-	131.071728;85.065559;87.044872;113.023633;69.034301	level3	2.04135e+07
3,4-secocycloarta-4(28),16(17),20(21),24-(Z)-tetraene-3,7beta,-lactone-3-oic acid|angustific acid A	0.90861	C30H40O4	465.299	466.242	0.309836	pos	[M+H]+	465.300246;419.290452;119.085628;447.287882;145.100727	level3	2.03746e+07
7,8-Dihydroxycoumarin	0.957925	C9H6O4	179.033	953.399	1.22231	pos	[M+H]+	179.033026;120.04464;147.043284;73.02786;55.017749	level2	2.02851e+07
14-Deoxyandrographolide	0.999091	C20H30O4	335.219	466.892	0.325275	pos	M+H	335.219977;317.212264;191.106684;336.120669;299.197689	level1	2.02527e+07
Anisic aldehyde	0.9754	C8H8O2	137.059	174.466	2.54015	pos	[M+H]+	137.059809;120.044513;95.084942;138.09003;81.069273	level2	2.02366e+07
Ethyl 7-epi-12-hydroxyjasmonate glucoside	0.62198	C20H32O9	415.197	254.792	0.228039	neg	[M-H]-	415.102095;371.072452;59.013637;205.051589;221.046201	level3	2.01403e+07
3alpha,19alpha-dihydroxy-12alpha-methoxydubos-13(14)-ene-24,28-dioic acid|duboscic acid	0.944192	C31H48O7	531.332	507.12	0.252172	neg	[M-H]-	487.335401;407.329752;405.31455;533.340982;488.344283	level3	2.01391e+07
5'-<4alpha-ethenyl-4beta-methyl-3beta-(1-methylethenyl)cyclohex-1beta-yl>-3aalpha,3',4',5,6,7,8,8a,9,9aalpha-decahydro-5beta,8abeta-dimethylspiro<naphtho<2,3-b>furan-3,2'-2'H-pyran>-2(3H)-on|5'-[4alpha-ethenyl-4beta-methyl-3beta-(1-methylethenyl)cyclohex-1beta-yl]-3aalpha,3',4',5,6,7,8,8a,9,9aalpha-decahydro-5beta,8abeta-dimethylspiro(naphtho[2,3-b]furan-3,2'-2'H-pyran)-2(3H)-on	0.852624	C30H42O3	451.32	405.739	0.646517	pos	[M+H]+	451.323263;405.315405;107.084847;187.147883;145.100701	level3	2.01123e+07
Methyl 2-(methylamino)benzoate	0.686154	C9H11NO2	166.086	79.6877	0.851694	pos	[M+H]+	134.059458;59.049284;106.065468;148.04649;108.043654	level3	2.01112e+07
(-)-hopeanol|hopeanol	0.613201	C29H20O9	511.116	39.9978	14.9052	neg	[M-H]-	511.103526;331.047825;305.068354;349.057619;159.043817	level3	2.00608e+07
Tricalysiolide H	0.828935	C21H32O5	365.232	283.402	2.66369	pos	[M+H]+	365.228688;273.18544;347.223539;107.04893;119.085701	level3	2.00468e+07
cephalosol|methyl 8-hydroxy-10-methoxy-3-methyl-5,7-dioxo-5,7-dihydro-1H-furo[3,4-c]isochromen-3-yl-acetate	0.784696	C16H14O8	333.06	50.6924	1.53798	neg	[M-H]-	333.058972;315.052615;96.96059;289.072641;167.033562	level3	2.0045e+07
3-O-sulfoechinocystic acid 28-beta-glucopyranosyl ester	0.678977	C36H58O12S	713.349	557.231	3.12241	neg	[M-H]-	713.357745;397.134979;279.23229;677.366482;415.146524	level3	1.98801e+07
(-)-Pereniporin B	0.880611	C15H22O4	267.159	221.745	2.04869	pos	[M+H]+	267.15808;81.069304;147.116848;105.033406;165.126517	level3	1.98681e+07
ACTG-toxin B	0.792565	C21H30O4	347.221	330.666	0.700971	pos	[M+H]+	347.223932;273.184957;119.085475;91.054355;147.080075	level3	1.98502e+07
7-O-beta-D-Glucopyranosylcatechin-(4alpha->8)-catechin	0.808489	C36H36O17	739.208	94.5441	27.6147	neg	[M-H]-	125.023843;739.194869;167.034169;407.074396;587.138562	level3	1.98235e+07
2-Hydroxy-3-(4-methoxyphenyl)propanoic acid	0.933988	C10H12O4	197.08	132.82	1.17302	pos	[M+H]+	151.037995;197.117153;179.105126;133.101531;73.028058	level2	1.97193e+07
Fuscoatramide	0.943961	C10H17NO4	216.124	898.411	0.0613919	pos	[M+H]+	216.124475;175.096399;217.123423;176.106258;134.070517	level3	1.96804e+07
inocalophyllin B methyl ester	0.771883	C33H48O6	539.334	572.886	2.47863	neg	[M-H]-	471.341835;539.333663;59.926919;472.350016;540.338494	level3	1.95693e+07
Methyl 2-methoxybenzoate	0.870576	C9H10O3	167.07	220.926	1.56565	pos	[M+H]+	167.068841;43.017662;109.064524;107.049068;79.053949	level2	1.95641e+07
Oblongolide	0.905926	C14H20O2	221.153	426.344	0.460683	pos	[M+H]+	221.152794;161.13299;133.101282;151.075727;81.069212	level3	1.94773e+07
chamazulene	0.888041	C13H16	173.132	200.288	0.500658	pos	[M+H]+	173.132904;131.085798;145.10061;158.109699;117.069843	level3	1.94702e+07
Cimigenoside	0.781142	C35H56O9	603.391	801.028	0.0893418	pos	M+H-H2O	85.076257;131.080264;603.428056;603.534819;585.426827	level1	1.94177e+07
O2'-Hexadecanoyl-3-Methyl-2-[6-(3-methyl-2-butenyl)-1H-indol-3-yl]-1,3-butanediol	0.623053	C34H55NO3	526.43	770.952	0.494758	pos	[M+H]+	526.524851;89.059619;327.197739;526.49585;133.084903	level3	1.93941e+07
Alpha-Santonin	0.891682	C15H18O3	229.122	203.16	0.126499	pos	M+H-H2O	229.1228;201.127098;187.111512;173.130749;69.033483	level1	1.931e+07
(2R,3S,4S,5R,6R)-2-[[(2R,3R,4R,5S)-3,4-dihydroxy-5-(hydroxymethyl)oxolan-2-yl]oxymethyl]-6-[(2E)-3,7-dimethylocta-2,6-dienoxy]oxane-3,4,5-triol	0.703375	C21H36O10	466.265	247.31	1.28003	pos	[M+NH4]+	81.06929;137.133117;115.038293;95.084967;97.028355	level2	1.93066e+07
Gentianamine	0.724518	C11H11NO3	206.081	69.975	2.03043	pos	[M+H]+	206.081396;188.070784;109.027766;110.059745;81.033478	level2	1.92823e+07
4alpha-methylergosta-8,24(28)-diene-3,11-dione-26-oic acid|antcin A	0.864645	C29H42O4	455.314	485.992	2.59755	pos	[M+H]+	455.320109;107.084872;437.306637;119.085613;187.148099	level3	1.91913e+07
12a-Acetoxyisomilleton	0.717932	C24H20O8	435.106	279.286	2.49872	neg	[M-H]-	435.107634;420.083411;145.029179;200.009218;185.022584	level3	1.91301e+07
5-Hydroxymethylfurfural	0.995346	C6H6O3	109.028	39.9485	0.442244	pos	M+H-H2O	81.033301;109.028759;53.038313;110.059615;82.036309	level1	1.89933e+07
(S)-alpha-terpinyl [alpha-L-(2-O-galloyl)arabinofuranosyl]-(1->6)-beta-D-glucopyranoside	0.944816	C28H40O14	599.241	270.632	11.9219	neg	[M-H]-	599.240701;152.011278;109.02984;108.021688;153.019606	level3	1.89673e+07
7alpha-acetoxy-21,23-epoxy-21xi-ethoxy-24,25,26,27-tetranorapotirucalla-1,14-dien-3-one|limocin C	0.991863	C30H44O5	483.311	516.309	0.00916143	neg	[M-H]-	483.306459;437.305303;53.701938;419.29931;484.315773	level3	1.89626e+07
3-oxo-Urs-12-ene-27,28-dioicacid|3-oxoquinovic acid	0.902337	C30H44O5	485.326	329.279	1.00451	pos	[M+H]+	485.325498;439.322789;421.306703;81.06988;467.309915	level3	1.89432e+07
7-hydroxy-1,4a-dimethyl-9-oxo-7-propan-2-yl-2,3,4,4b,5,6,10,10a-octahydrophenanthrene-1-carboxylic acid	1	C20H30O4	335.219	422.526	0.207472	pos	[M+H]+	335.220039;336.222662;81.06929;95.084961;107.084906	level2	1.89319e+07
Clionasterol	0.996194	C29H50O	397.382	781.398	0.736143	pos	[M+H]+	397.383335;147.116729;161.132933;95.084958;109.101221	level2	1.89291e+07
(3beta.19alpha)-3,19,23-trihydroxyolean-12-ene-24,28-dioic acid|ilexhainanin D	0.672475	C30H46O7	517.317	291.25	1.5932	neg	[M-H]-	517.317063;469.296724;57.480518;355.249549;499.301744	level3	1.89131e+07
2-C-Methyl-1,4-erythrono-D-lactone	0.752485	C5H8O4	131.036	814.701	1.90876	neg	[M-H]-	131.035757;89.014415;65.014554;90.00951;104.024899	level3	1.8868e+07
Turraflorin H	0.750341	C31H40O9	555.256	204.308	1.8856	neg	[M-H]-	555.251825;327.220006;152.995953;171.101359;211.132562	level3	1.88018e+07
Gallicynoic acid F	0.941139	C18H32O6	343.212	257.714	0.460696	neg	[M-H]-	343.213823;59.013662;199.131803;325.198649;85.029777	level3	1.87855e+07
1alpha,3beta-dihydroxy-25-hydroperoxycycloart-23E-en-28-oic acid|musambin B	0.998423	C30H48O6	503.336	486.585	1.43112	neg	[M-H]-	503.343393;457.329707;55.926861;504.334836;413.34608	level3	1.87808e+07
reptanslactone B	1	C29H44O9	537.301	548.624	1.36564	pos	[M+H]+	537.302698;538.306656;59.701668;203.050913;185.042786	level3	1.8729e+07
Okanin 4-methyl ether 4'-primveroside	0.645357	C27H32O15	595.167	156.57	0.0647831	neg	[M-H]-	289.072384;167.033602;595.158857;125.023576;159.029127	level3	1.87257e+07
(9S,13S)-12-Oxophytodienoic acid	0.923134	C18H28O3	293.21	526.241	0.614033	pos	[M+H]+	275.202096;293.207962;125.095493;81.069151;55.01784	level3	1.86394e+07
Chionographolone	0.640826	C27H42O5	445.296	446.142	0.147884	neg	[M-H]-	445.294106;401.309599;383.297699;446.299298;402.306466	level3	1.86318e+07
CBMicro_015029	0.847089	C19H21NO3	312.159	46.5471	0.461705	pos	[M+H]+	312.158417;70.065203;180.101362;235.076136;259.110336	level3	1.86215e+07
methyl (4E)-6,7,9-trihydroxydec-4-enoate	0.869033	C11H20O5	231.124	136.703	1.87671	neg	[M-H]-	171.102053;231.125038;59.013768;169.123486;213.113333	level3	1.86173e+07
3beta,23,25-trihydroxy-24,28-epoxy-5alpha-stigmasta-8(9),14(15)-diene	0.940219	C29H46O4	457.332	521.327	0.42078	neg	[M-H]-	457.329467;439.320881;191.145147;189.128158;50.815088	level3	1.8596e+07
Methyl 3,4-dihydro-5-methyl-8-isopropyl-2-naphthalenecarboxylate	0.731673	C16H20O2	245.153	189.329	1.51881	pos	[M+H]+	245.153186;227.141763;147.116819;199.149054;146.10907	level3	1.85139e+07
Hexadecanedioic acid	0.973383	C16H30O4	285.207	499.184	1.40763	neg	M-H	285.206762;223.207536;267.197263;241.215345;286.209542	level1	1.84428e+07
Asperuloide C	0.879407	C28H42O14	601.247	429.86	0.0643094	neg	[M-H]-	601.251895;100.933641;583.22958;66.80622;602.244607	level3	1.84411e+07
2-[3,5-di-O-beta-D-glu-4-(3-methylbut-2-enyl)phenyl]benzofuran-6-ol|2-[3,5-di-O-beta-D-glucosyl-4-(3-methylbut-2-enyl)phenyl]benzofuran-6-ol	0.632647	C31H38O14	633.218	279.591	2.2476	neg	[M-H]-	167.033854;289.07249;633.225961;125.023741;123.045797	level3	1.8438e+07
salaspermic acid	0.917561	C29H44O5	473.326	486.083	1.61065	pos	[M+H]+	473.329398;455.306997;95.084933;121.101316;107.085122	level3	1.83581e+07
cyclosquamosin D	0.886157	C41H56N8O11	835.397	365.46	0.555023	neg	[M-H]-	835.399028;183.1401;673.322384;227.128764;165.127902	level3	1.83275e+07
(24R)-11alpha,20,24-trihydroxyecdysone	0.750045	C27H44O9	511.29	482.525	1.73554	neg	[M-H]-	511.269732;183.137609;405.228256;363.221128;165.127543	level3	1.83044e+07
10(S),11(S),12(S)-hepoxilin B3 methyl ester|erythro hepoxilin B3 methyl ester|Methyl (10S,11R,12S)-10-hydroxy-11,12,-epoxyeicosa-5(Z),8(Z),14(Z)-trienoate	0.892883	C21H34O4	351.252	555.739	1.33886	pos	[M+H]+	351.249753;277.218012;151.111577;81.03317;67.054287	level3	1.82525e+07
1-propenyl-2-methyl-1,3-cyclohexadiene	0.963496	C10H14	135.117	735.413	3.72681	pos	[M+H]+	135.116341;93.069808;107.084989;79.053929;136.086599	level3	1.81289e+07
Narthogenin	0.835594	C5H6O4	129.019	50.8827	0.70755	neg	[M-H]-	85.029667;129.01949;57.034403;44.998317;71.013741	level3	1.81115e+07
3'-(beta-D-glucopyranosyloxy)-7-methoxy-5'-(methoxycarbonyl)isoflavone|3-(beta-D-glucopyranosyloxy)-5-(7-methoxy-4-oxo-4H-1-benzopyran-3-yl)benzoic acid methyl ester|caragiside C	0.716402	C24H24O11	487.125	230.271	2.72953	neg	[M-H]-	325.071922;219.028806;487.12925;231.028074;145.029144	level3	1.80817e+07
Isopilosine	0.896996	C16H18N2O3	287.138	51.7942	1.06088	pos	[M+H]+	269.128806;287.138873;251.11548;209.107598;208.098723	level3	1.80714e+07
cirsimarin	0.84001	C23H24O11	475.125	183.607	2.46118	neg	[M-H]-	167.033925;475.122427;123.045848;139.039698;125.023803	level2	1.80646e+07
3-O-beta-D-glucopyranosyl-2-deoxy-D-ribono-gamma-lactone	0.649968	C11H18O9	295.107	178.266	16.5854	pos	[M+H]+	259.093026;295.10318;211.070464;277.218729;81.07017	level3	1.80387e+07
E-3,4-dimethoxycinnamyl omega-hydroxylinoleate	0.71589	C29H44O5	473.326	356.304	1.55842	pos	[M+H]+	217.12309;473.328999;455.318805;165.091048;205.157794	level3	1.80126e+07
1,2-Dehydro-alpha-cyperone	0.944471	C15H20O	217.158	366.759	0.947652	pos	[M+H]+	217.157846;157.100095;119.085749;159.11625;105.069525	level2	1.79926e+07
Melibiose	0.973177	C12H22O11	365.104	32.0964	0.700857	pos	[M+Na]+	365.102962;203.050993;185.042696;366.112798;60.346343	level2	1.79872e+07
desoxyaxillarine	0.723117	C18H27NO6	352.177	182.005	2.02679	neg	[M-H]-	130.087003;352.177784;308.187553;128.10834;334.164231	level3	1.79862e+07
Sinapaldehyde	0.960437	C11H12O4	209.08	141.152	1.38518	pos	M+H	209.082315;177.053531;55.017763;149.058706;121.06412	level1	1.79199e+07
harmalol	0.74158	C12H12N2O	201.107	123.627	23.3089	pos	[M+H]+	159.092456;201.104049;132.080205;145.100601;160.075287	level3	1.78985e+07
3-(2-Furanyl)-2-propenal	0.999503	C7H6O2	123.044	145.01	1.76099	pos	[M+H]+	123.043754;95.049344;81.070047;124.039145;67.054305	level2	1.78983e+07
(5Z)-5-ethylidenefuran-2(5H)-one|(Z)-5-Ethylidene-2(5H)-furanone|(Z)-5-ethylidene-2(5H)furanone	0.985746	C6H6O2	109.029	61.0379	3.08756	neg	[M-H]-	109.029763;65.039802;67.019095;41.00338;108.021603	level3	1.78972e+07
Villiramulin B	0.822585	C18H26O	259.205	421.628	0.0886632	pos	[M+H]+	259.205757;159.116942;241.19267;173.132781;147.11681	level3	1.78838e+07
5,5'-Dimethoxy-7-oxolariciresinol 4'-O-beta-D-apiofuranosyl-(1->2)-beta-D-glucopyranoside	0.928391	C33H44O18	727.244	184.871	0.75588	neg	[M-H]-	727.255616;152.010956;315.072786;503.193586;153.019209	level3	1.78655e+07
stigmast-4-ene-1,3-dione	0.809662	C29H46O2	427.356	526.418	0.270199	pos	[M+H]+	427.360568;99.080335;95.084781;327.267538;309.258509	level3	1.78592e+07
6'-O-feruloyl-desglucouzarin	0.719211	C39H52O12	711.338	495.476	2.73717	neg	[M-H]-	711.323838;397.135497;277.216;675.362844;161.046292	level3	1.78558e+07
(+)-(3S*,4R*,5R*)-trihydroxysabinane	0.662104	C10H18O3	187.132	92.5387	1.84728	pos	[M+H]+	187.111298;159.11563;145.101486;131.084711;81.069533	level3	1.78475e+07
12a-Hydroxymunduserone	0.736742	C19H18O7	359.112	242.059	1.30043	pos	[M+H]+	107.048898;253.070369;359.114805;193.048756;235.058747	level3	1.78129e+07
(3S,4S,5R)-4-[(2R,3R)-2,3-dihydroxy-3-[(2S,3R,5R,10R,13R,14S,17S)-2,3,14-trihydroxy-10,13-dimethyl-6-oxo-2,3,4,5,9,11,12,15,16,17-decahydro-1H-cyclopenta[a]phenanthren-17-yl]butyl]-3,5-dimethyloxolan-2-one	1	C29H44O8	559.266	513.462	1.4632	pos	[M+K]+	336.26077;560.270245;155.011019;98.98431;89.059594	level2	1.77917e+07
Hydroxyespintanol	0.964287	C12H18O4	225.113	223.961	1.15335	neg	[M-H]-	225.11274;207.10091;181.122329;163.111717;97.029744	level3	1.77609e+07
LS-14516	0.807823	C16H22O9	357.119	40.1262	0.94952	neg	[M-H]-	195.064509;111.008733;59.013718;136.052317;113.013396	level3	1.77119e+07
5-ethylcyclopentene-1-carbaldehyde	0.97481	C8H12O	125.096	233.188	2.60948	pos	[M+H]+	125.095503;43.017649;107.084918;83.048867;126.054882	level3	1.75864e+07
(3b,6b,8a,12a)-8,12-Epoxy-7(11)-eremophilene-6,8,12-trimethoxy-3-ol	0.927724	C18H30O5	325.201	388.819	2.41202	neg	[M-H]-	325.204754;307.189333;279.198055;263.199088;125.097576	level3	1.75821e+07
Myristicin	0.888098	C11H12O3	193.085	47.8192	1.22039	pos	[M+H]+	193.086384;105.069174;161.058676;133.063965;91.054153	level2	1.75779e+07
INDOLE	0.999998	C8H7N	118.065	41.315	2.9358	pos	[M+H]+	118.085844;59.072635;119.085715;91.054422;72.080669	level2	1.75504e+07
Pangkorimine	0.896508	C34H32N2O6	565.23	126.632	11.2195	pos	[M+H]+	565.239397;418.169772;287.110327;566.241661;256.1134	level3	1.75393e+07
alpha-Curcumene	0.963353	C15H22	203.179	701.294	0.198146	pos	[M+H]+	203.179453;133.101373;147.116962;119.085694;95.084914	level3	1.75098e+07
Acuminatopyrone	0.890514	C11H11NO3	206.08	39.1917	1.52123	pos	[M+H]+	206.116904;188.070428;178.084981;81.033328;160.075152	level3	1.74966e+07
3-butyl-4-hydroxy-3H-2-benzofuran-1-one	0.82818	C12H14O3	205.087	284.031	1.51073	neg	[M-H]-	161.097807;205.087711;106.042826;150.031068;162.102194	level3	1.74903e+07
methyl ent-12-hydroxy-16-oxolabda-7,13Z-dien-15-oate	0.854341	C21H32O4	349.237	204.534	1.5346	pos	[M+H]+	349.236193;91.054405;81.070015;275.201503;145.100767	level3	1.74833e+07
Lucidin ethyl ether	0.656065	C17H14O5	299.09	334.269	2.66717	pos	[M+H]+	107.049031;193.049183;299.092351;149.058867;108.05162	level3	1.73907e+07
Capsi-amide	0.981623	C17H35NO	270.278	752.657	0.241836	pos	[M+H]+	270.27724;88.075183;57.069571;102.091332;271.282535	level3	1.72942e+07
(S)-Nerolidol 3-O-[a-L-rhamnopyranosyl-(1->4)-a-L-rhamnopyranosyl-(1->6)-b-D-glucopyranoside]	0.99988	C33H56O14	677.372	589.378	3.39032	pos	[M+H]+	677.363944;515.322556;678.378241;75.265346;347.091944	level3	1.72937e+07
methyl ent-6,16-dioxo-8,12-oxido-labda-13Z-en-15-oate	0.872351	C21H30O5	363.215	357.817	2.59388	pos	[M+H]+	363.217731;289.177015;57.033419;55.054215;67.05389	level3	1.72757e+07
Pseudolarolide C	0.96347	C31H48O6	515.338	582.889	0.187787	neg	[M-H]-	515.331726;497.325731;421.306641;465.297172;57.26043	level3	1.71818e+07
MGMG 18:3	0.895972	C27H46O9	513.305	563.957	2.67456	neg	[M-H]-	277.21591;253.093205;59.013792;101.024732;89.024555	level3	1.71768e+07
1-O-[(E)-5-hydroxyferuloyl]-beta-glucopyranose	0.823775	C16H20O10	371.098	36.6912	1.15053	neg	[M-H]-	191.055962;209.031051;85.029002;371.098075;135.044719	level3	1.71766e+07
<alpha-L-rhamnopyranosyl(1->4)-beta-D-glucopyranosyl(1->)3>-3,23beta-di-hydroxy-olean-12-en-28-oic acid|[alpha-L-rhamnopyranosyl(1->4)-beta-D-glucopyranosyl(1->)3]-3,23beta-di-hydroxy-olean-12-en-28-oic acid	0.925466	C43H72O13	797.516	826.369	5.92082	pos	[M+H]+	797.525116;797.498084;519.29373;798.525377;89.059797	level3	1.70736e+07
cryptomanhydride	0.740489	C30H40O3	449.304	430.657	0.890718	pos	[M+H]+	449.304902;403.296556;107.048989;119.085638;149.131141	level3	1.70571e+07
Corosolic acid	0.999067	C30H48O4	471.347	623.064	1.29731	neg	[M-H]-	471.342066;52.372524;273.075499;472.350523;167.033845	level2	1.70354e+07
Damascenine	0.93043	C10H13NO3	194.082	431.41	1.2831	neg	[M-H]-	194.080891;179.059976;108.045842;152.035414;164.083483	level3	1.70298e+07
Cappariloside A	0.622018	C16H18N2O6	335.123	181.654	0.423705	pos	[M+H]+	69.069797;150.055247;335.124256;317.113037;218.116707	level3	1.69657e+07
Aleprylic acid	0.867835	C12H20O2	195.139	320.889	1.23559	neg	[M-H]-	195.139791;75.00883;59.013788;129.019702;177.127817	level3	1.6964e+07
Isokobusone	1	C14H22O2	221.155	548.128	2.27809	neg	[M-H]-	221.15273;222.158611;206.131475;205.123743;55.289313	level2	1.69573e+07
6-O-capryl-3'-O-isobutyryl-3,4-di-O-(2-methylbutyryl)sucrose	0.704346	C36H62O15	733.402	328.798	0.0325528	neg	[M-H]-	733.390332;187.096895;125.097494;327.220486;423.189774	level3	1.69406e+07
Brevipolide B	0.699955	C23H24O8	427.14	283.123	2.15317	neg	[M-H]-	163.076241;148.05211;207.064706;427.141205;119.050203	level3	1.68703e+07
Asteryunnanoside I	0.63282	C22H30O11	469.172	161.853	1.73601	neg	[M-H]-	469.175231;163.039202;205.048933;161.06095;265.072037	level3	1.68391e+07
4,5-dihydroxy-12-methyloxacyclododecan-2-one	0.866764	C12H22O4	229.144	313.66	0.738004	neg	[M-H]-	229.143018;211.133069;167.142596;185.15556;79.957342	level3	1.6819e+07
5alpha-propionyloxy-silphinen-3-one	0.6179	C18H26O3	291.194	537.322	2.34298	pos	[M+H]+	165.090777;291.193573;67.053777;171.101044;245.190226	level3	1.68149e+07
Phenarctin	0.747751	C21H20O8	399.109	218.628	1.79367	neg	[M-H]-	163.039227;119.050433;399.109054;179.034171;135.044821	level3	1.67912e+07
Jatamanvaltrate E	0.895147	C28H44O12	571.273	569.029	0.488809	neg	[M-H]-	571.278253;100.933636;63.475797;572.278447;553.263116	level3	1.67732e+07
Curcumin I	0.83353	C23H24O6	397.164	177.045	0.249181	pos	[M+H]+	397.164797;273.110581;137.059654;354.146775;379.157494	level2	1.6757e+07
Alisol P	0.998901	C30H48O7	519.32	364.591	25.5586	neg	[M-H]-	519.328301;473.325813;57.704509;520.338444;501.318534	level3	1.67562e+07
6'-O-trans-Feruloylnodakenin	0.829714	C30H32O12	583.187	39.7989	0.258508	neg	[M-H]-	117.018948;73.029581;583.196142;115.04043;101.023885	level3	1.67302e+07
Demethyltorosaflavone C	0.860476	C21H14O8	395.073	54.1925	0.523172	pos	[M+H]+	395.073566;237.09337;236.09337;378.188703;70.065206	level3	1.67196e+07
alpha-o-methylbotrydialone|alpha-O-methyldihydrobotrydialone	0.807882	C18H28O6	341.195	365.418	0.0926201	pos	[M+H]+	107.048971;341.138914;235.093737;323.1854;81.069227	level3	1.67018e+07
tranylcypromine	1	C9H11N	134.104	211.696	61.1286	pos	[M+H]+	134.096583;135.099337;107.084926;93.06991;119.073214	level3	1.66998e+07
alpha-Ionene	0.920093	C13H18	175.148	339.615	1.50342	pos	[M+H]+	175.146469;119.085345;133.101283;105.069504;70.06521	level3	1.66986e+07
Ceanothetric acid	0.738203	C30H44O7	517.315	405.021	0.577711	pos	[M+H]+	517.309111;499.307503;453.297715;471.308314;435.284748	level3	1.66902e+07
SCHEMBL1224574	0.760579	C17H14O6	315.085	220.042	2.08325	pos	[M+H]+	107.049082;181.048396;287.09255;315.084386;139.038014	level3	1.66882e+07
pisiferadinol|Pisiferdiol|sawaradienone	0.954571	C20H30O3	319.226	292.557	0.73294	pos	[M+H]+	319.226419;301.214157;97.100721;95.08496;55.0542	level3	1.66845e+07
1-(3-hydroxyisovaleryl)-7,10,11-triisovalerylvaltrate hydrine|sorbifolivaltrate C	0.710546	C30H46O11	581.298	665.321	1.07479	neg	[M-H]-	581.307076;80.964642;225.0084;164.985315;94.980467	level3	1.66713e+07
(Sa)-rel-(5R,6S,7R,8R)-5,6,7,8-tetrahydro-2,3,13-trimethoxy-6,7-dimethylbenzo[3,4]cycloocta[1,2-f][1,3]benzodioxole-1,5,8-triol 8-acetate 5-benzoate|kadsuphilol P	0.878434	C31H32O10	565.206	284.721	0.0302209	pos	[M+H]+	565.207261;167.068735;191.068186;133.027682;107.048966	level3	1.66712e+07
chaetomugilin M	0.988699	C23H27ClO7	451.156	43.7545	1.00238	pos	[M+H]+	451.162472;289.067635;153.017097;452.165823;163.039295	level3	1.66507e+07
Celephtalide B	0.737395	C23H32O12	499.181	181.689	2.34643	neg	[M-H]-	499.181595;235.062856;193.049815;191.072355;134.03704	level3	1.66493e+07
Aurantiamide acetate	0.998531	C27H28N2O4	467.193	437.803	0.20713	pos	M+Na	467.197113;407.173382;105.03325;468.193008;51.911465	level1	1.66379e+07
4beta-hydroxy-11,12,13-trinor-5-eudesmen-1,7-dione	0.765446	C12H16O3	209.116	184.379	2.81673	pos	[M+H]+	111.044279;83.048635;163.112161;209.118556;153.126322	level3	1.66116e+07
Lepidiumterpenoid	0.974684	C27H48O2	405.371	859.559	1.68827	pos	[M+H]+	405.374422;139.075118;93.069894;95.084792;111.07971	level3	1.65991e+07
acanthoside B	0.783206	C28H36O13	598.247	150.137	0.78869	pos	[M+NH4]+	205.086847;265.104148;173.058745;167.071231;217.083982	level2	1.65773e+07
methyl 6-hydroxy grindelate	0.900298	C21H34O4	351.252	394.637	0.838137	pos	[M+H]+	351.210772;259.204884;81.06994;93.069683;95.084791	level3	1.65196e+07
tabulalin|Tabularin	0.657235	C29H36O13	591.199	249.735	14.1891	neg	[M-H]-	273.075542;167.033967;591.205399;125.023739;123.044198	level3	1.64021e+07
Khayanolide C	0.615356	C27H32O10	515.191	65.4012	1.09028	neg	[M-H]-	111.008751;271.095031;165.054407;515.119364;467.175731	level3	1.63931e+07
14-hydroxy-3-((5-hydroxy-4-methoxy-6-methyltetrahydro-2H-pyran-2-yl)oxy)-10,13-dimethyl-17-(5-oxo-2,5-dihydrofuran-3-yl)hexadecahydro-1H-cyclopenta[a]phenanthren-16-yl acetate	0.833124	C32H48O9	599.311	570.52	11.2225	pos	[M+Na]+	337.269233;599.374372;155.010827;98.984441;263.238252	level2	1.63315e+07
Subalatin	0.602233	C24H20O9	451.104	275.776	0.307145	neg	[M-H]-	391.079109;451.100896;285.039268;301.072287;407.11651	level3	1.62956e+07
withafastuosin C	0.630456	C29H40O6	485.286	657.632	0.23779	pos	[M+H]+	313.272061;57.069974;155.010221;449.270394;71.085668	level3	1.62747e+07
3,5-dihydro-3-oxo-ML-236C	0.845262	C18H26O4	307.19	361.809	0.969602	pos	[M+H]+	289.181127;307.186259;121.063856;81.069773;95.084953	level3	1.62453e+07
Neovibsanin D	0.854017	C26H38O7	463.267	345.358	1.83253	pos	[M+H]+	463.270782;97.100693;109.02756;81.033332;95.084948	level3	1.62257e+07
Zanthodioline	0.851784	C16H19NO5	306.133	79.4455	1.20564	pos	[M+H]+	306.130144;192.102286;288.122591;126.090423;177.054153	level3	1.62108e+07
Raspberry ketone glucoside	1	C16H22O7	349.125	174.729	1.40696	pos	M+Na	349.126511;350.131061;141.054999;185.042779;285.186727	level1	1.6146e+07
Esculentoside D	0.718603	C37H58O12	693.383	356.284	2.33503	neg	[M-H]-	485.326986;693.398665;467.31443;647.382729;486.342812	level3	1.6129e+07
isopimaryl 2beta-acetyl-5alpha-methyl-cyclopenta-beta-carboxylate	0.809886	C29H44O3	441.336	507.884	1.01539	pos	[M+H]+	441.33084;423.31712;107.085284;119.084524;147.117201	level3	1.6107e+07
6-(1-butenyl)-cyclohepta-1,4-diene	0.980678	C11H16	149.132	735.413	0.0748693	pos	[M+H]+	149.131225;93.069908;107.084956;150.101918;81.069257	level3	1.61067e+07
Posoquenin	0.912512	C11H14O7	259.08	158.761	0.349305	pos	[M+H]+	97.028199;69.033535;260.114753;85.028495;259.095597	level3	1.60949e+07
Sinapyl 9-O-[??-D-apiofuranosyl(1閳ユ◤鍌楀瀻6)]-O-??-D-glucopyranoside	0.614686	C22H32O13	503.177	153.932	0.43535	neg	[M-H]-	293.0898;89.024504;59.01381;71.013824;125.023689	level3	1.60932e+07
Militarinone B	0.77071	C26H33NO5	440.239	155.605	2.76834	pos	[M+H]+	184.07363;104.106678;440.242455;86.096181;124.999827	level3	1.60818e+07
Kadcoccilactone C	0.796032	C30H44O7	515.301	421.633	0.55212	neg	[M-H]-	515.303912;471.305802;453.295831;57.256789;516.302632	level3	1.60549e+07
Fukujusone	0.925151	C21H32O4	349.237	282.894	1.54324	pos	[M+H]+	349.236191;81.070023;275.201523;109.064309;119.085611	level3	1.60523e+07
pinoresinol-4'-O-[6''-O-(E)-feruloyl]-beta-D-glucopyranoside	0.872774	C36H40O14	695.233	253.209	1.46098	neg	[M-H]-	695.233819;175.039648;337.094019;160.016108;151.039664	level3	1.6043e+07
dysoxin 2b	0.695568	C39H56O7	635.387	627.381	5.35571	neg	[M-H]-	635.393451;617.388598;161.024137;145.029122;121.029765	level3	1.6004e+07
9-O-Feruloyl-5,5'-dimethoxylariciresinol	0.605869	C32H36O11	597.231	250.596	1.26138	pos	[M+H]+	107.048662;393.10058;147.043432;167.070815;191.071142	level3	1.60005e+07
Nardosinone	0.927399	C15H22O3	251.164	248.84	0.413333	pos	[M+H]+	251.163208;233.15446;163.112649;205.157878;119.085536	level2	1.59647e+07
Beta-Caryophyllene Alcohol	0.726983	C15H26O	240.232	735.413	0.318019	pos	[M+NH4]+	240.234361;69.069806;83.084993;57.069933;205.195989	level2	1.59537e+07
3-Methyl-6-(1-methyl-5-hexenyl)-2-cyclohexene-1-one	0.765879	C14H22O	207.174	568.935	1.78587	pos	[M+H]+	189.164303;207.17516;135.116068;115.963005;107.084901	level3	1.59512e+07
MS000125317	1	C29H42O5	471.309	373.858	1.59335	pos	[M+H]+	471.308989;472.206671;453.291244;151.073875;107.085012	level3	1.59435e+07
3-Methyl-2-oxovaleric acid	0.950529	C6H10O3	113.059	53.5304	3.51819	pos	[M+H]+	95.049209;113.05882;67.053749;57.033318;71.048896	level2	1.59417e+07
4,5-dioxo-seco-gamma-eudesmol-(alpha-xylopyranoside-2-O-acetate)|4,5-dioxo-seco-gamma-eudesmol-<alpha-xylopyranoside-2-O-acetate>	0.665579	C22H36O8	427.234	397.405	0.415197	neg	[M-H]-	311.223345;427.04111;115.003434;71.013831;309.208941	level3	1.59279e+07
alpha-Hydroxy-1-methyl-1H-indole-3-propanoic acid	0.759009	C12H13NO3	220.096	90.1282	1.63127	pos	[M+H]+	202.085425;220.09488;174.091604;146.09612;192.064631	level2	1.58746e+07
(2E,3R,4R)-2-(11-dodecenylidene)-3-hydroxy-4-methoxy-4-methylbutanolide	0.869343	C18H30O4	309.207	342.573	0.0387148	neg	[M-H]-	309.20891;183.101332;291.195727;171.101769;239.164315	level3	1.58717e+07
ACTG toxin B	0.921994	C21H32O4	349.236	432.289	1.0161	pos	[M+H]+	349.236319;275.202158;79.054036;107.084939;93.069882	level3	1.58668e+07
1-(2-Piperidinyl)-2-pentanone	0.697035	C10H19NO	170.153	735.981	2.51065	pos	[M+H]+	170.153805;69.070012;153.126917;135.116469;111.116317	level3	1.58606e+07
Cinnamaldehyde	0.958422	C9H8O	133.064	239.738	3.66498	pos	[M+H]+	133.06438;55.017902;115.054396;105.06943;91.053479	level2	1.58392e+07
(1S,4R)-p-Mentha-2,8-dien-1-ol	0.94773	C10H16O	153.127	165.553	0.290745	pos	[M+H]+	107.084867;135.116376;153.126912;93.069784;95.084873	level2	1.58042e+07
3,5,4',5''-tetrahydroxy-7-methoxy-6-[1-(p-hydroxy-phenyl)ethyl]flavanone	0.792899	C24H22O7	423.134	309.922	21.8499	pos	[M+H]+	107.048966;423.14008;275.091925;169.048092;149.059024	level3	1.57666e+07
(3R,4R,6R,7S,8S,10R)-1-oxo-3-methoxy-8-angeloyloxy-10-hydroxygermacra-11(13)-en-12,6-olide|rufesolide D	0.967415	C21H30O7	393.194	219.159	1.51237	neg	[M-H]-	393.193977;79.957284;191.075199;80.964643;329.230911	level3	1.57444e+07
methyl (1alpha, 4aalpha,5alpha,6beta,8aalpha)-5-[2-(3-furan-3-en-2-one)ethyl]-1,2,3,4,4a,5,6,7,8,8a-decahydro-1,2-dihydroxy-1-naphthalenecarboxylate	0.637911	C21H32O6	381.227	174.707	2.00263	pos	[M+H]+	201.163821;159.116774;145.100419;107.048697;121.100963	level3	1.56931e+07
Asebotoxin X	0.927587	C23H38O8	441.253	653.909	1.34863	neg	[M-H]-	441.250378;96.959498;68.690015	level3	1.56245e+07
23xi,24xi-lanost-9(11)-en-3beta,7beta,16beta,19,23,24,25-heptaol 3-O-beta-D-xylopyranoside|orbicoside	0.632258	C35H60O11	655.406	362.302	0.00339461	neg	[M-H]-	227.899155;609.330697;655.384068;118.719093;158.345711	level3	1.5592e+07
5,7-dimethoxy-6-(1',2',3'-trihydroxypropyl)-2H-1-benzopyran-2-one	0.642362	C14H16O7	295.082	56.9477	1.1267	neg	[M-H]-	295.081304;175.039455;235.062832;191.072097;160.015949	level3	1.55652e+07
Chrysin	0.997289	C15H10O4	253.051	352.242	2.44014	neg	M-H	253.049811;209.154829;63.024167;143.049792;254.053102	level1	1.55225e+07
SCHEMBL19413832	0.873151	C22H26O9	435.163	251.95	1.20966	pos	[M+H]+	181.050554;233.081326;417.154991;167.070921;107.048719	level3	1.54977e+07
anthcolorin E	0.614079	C33H49NO4	524.37	700.664	0.00667049	pos	[M+H]+	184.073696;524.371072;104.106721;86.096195;506.358794	level3	1.54176e+07
(16R,23S,25R)-16,23-epoxy-3,4:9,10-disecocycloartan-1(10),9(11)-diene-3(4),26(23)-diolide|pseudolarolide O	0.913563	C30H42O5	483.313	502.593	5.17419	pos	[M+H]+	483.310971;437.308323;465.301528;484.30516;419.29102	level3	1.54096e+07
Isolicopyranocoumarin	0.982498	C21H20O7	385.128	277.527	1.77341	pos	[M+H]+	385.124071;307.097343;279.100729;323.087879;386.132897	level3	1.53922e+07
1-(3',4'-dihydroxyphenyl)dodecan-5-one|1-(3,4-Dihydroxyphenyl)-5-dodecanone	0.928652	C18H28O3	293.21	199.873	0.862728	pos	[M+H]+	293.213165;275.201176;137.096099;93.069591;81.069988	level3	1.53864e+07
2-Acetylpyrrolidine	0.924571	C6H11NO	114.091	735.413	0.703923	pos	[M+H]+	114.102072;72.080536;97.076552;70.064965;91.057415	level2	1.52908e+07
alpha-Cyperone	0.986304	C15H22O	219.173	527.748	2.85117	pos	[M+H]+	219.172921;93.069894;81.069334;91.053444;131.084523	level2	1.52617e+07
alpha-Bisabolol oxide A	0.773117	C15H26O2	239.2	263.031	1.40343	pos	[M+H]+	89.059336;239.199869;95.085875;81.06996;69.06982	level3	1.52595e+07
Geijerene	0.958976	C12H18	163.147	735.413	2.61291	pos	[M+H]+	163.147893;107.084975;121.101319;93.069918;81.06928	level3	1.52536e+07
3-[(2,6-dideoxy-3-o-methylhexopyranosyl)oxy]-14-hydroxycard-20(22)-enolide	0.628699	C30H46O7	517.317	268.786	0.242197	neg	[M-H]-	517.316863;353.250743;71.050355;335.236446;111.008862	level3	1.52398e+07
Secologanin dimethyl acetal	0.636372	C19H30O11	433.172	114.182	2.05971	neg	[M-H]-	433.174901;300.027698;249.063174;271.022917;113.024829	level3	1.52207e+07
5-acetyloxy-12-hydroxy-3-methoxybibenzyl-6-carboxylic acid	0.765277	C18H18O6	331.117	193.841	0.691794	pos	[M+H]+	253.084529;313.10561;285.110371;225.092143;161.059046	level3	1.51707e+07
isocupressic acid	0.900881	C21H34O3	335.258	533.576	2.25972	pos	[M+H]+	335.257139;67.054254;81.069865;95.084592;93.069578	level3	1.51585e+07
15-(5-Hydroxy-6-methylhept-6-en-2-yl)-7,7,12,16-tetramethylpentacyclo[9.7.0.01,3.03,8.012,16]octadecan-6-ol	0.963377	C30H50O2	425.376	741.582	2.22182	pos	[M-H2O+H]+	425.380568;95.084733;191.178814;109.101115;217.195513	level2	1.51317e+07
methyl 2-[(4aR,5R,6R,7S,8aR)-8a-ethenyl-5,7-dihydroxy-4-methylidene-3-oxo-1,4a,5,6,7,8-hexahydroisochromen-6-yl]prop-2-enoate	0.911212	C16H20O6	331.119	36.7518	15.2496	pos	[M+Na]+	331.081942;153.017328;172.09578;108.081147;332.130663	level2	1.51001e+07
2-Hydroxylinolenic acid	0.872016	C18H30O3	295.226	447.428	1.22291	pos	[M+H]+	295.224923;277.213015;69.070043;93.069835;81.069388	level2	1.50994e+07
germacrenone	0.857256	C14H22O2	223.168	405.178	2.9322	pos	[M+H]+	223.168079;93.069872;163.147754;67.053819;121.101286	level3	1.50427e+07
Hydropiperoside	0.75171	C39H40O17	779.222	255.033	1.98289	neg	[M-H]-	779.222292;273.076225;167.034416;343.076163;505.138611	level3	1.50281e+07
Erucamide	0.982944	C22H43NO	338.34	767.269	1.72871	pos	[M+H]+	338.342979;83.085181;69.069962;57.069553;97.100678	level2	1.49752e+07
5''-methoxy-4''-O-(8-guaiacylglycerol)-epicatunaregin	0.66385	C42H48O16	809.299	239.833	1.36217	pos	[M+H]+	613.223685;167.068776;181.048122;387.145316;173.059617	level3	1.49497e+07
(25R)-3beta-Acetoxy-5alpha-spirostan-6-on|(25R)-3beta-acetoxy-5alpha-spirostan-6-one	0.999346	C29H44O5	471.311	376.005	0.657604	neg	[M-H]-	471.316987;52.368408;472.313479;427.316231;162.839445	level3	1.4901e+07
Garcilivin A	0.62852	C36H28O10	619.17	137.413	5.85137	neg	[M-H]-	191.056526;619.160902;179.034171;353.083885;167.033988	level3	1.48471e+07
(25S)-spirost-5-en-1beta,3betadiol 1-sulphate	0.847765	C27H40O8S	523.238	189.312	1.9647	neg	[M-H]-	523.242741;116.927932;151.061917;183.137385;313.116342	level3	1.48427e+07
communiol F	0.754257	C11H18O3	199.133	326.992	2.58115	pos	[M+H]+	111.043199;181.121317;163.110236;125.058657;135.116364	level3	1.48234e+07
Ethylparaben	0.935628	C9H10O3	167.07	310.354	1.69482	pos	[M+H]+	167.068834;123.043879;149.131258;69.070011;83.085265	level2	1.46956e+07
2alpha,3beta-dihydroxy-24-nor-urs-4(23),11-dien-28,13beta-olide|ilekudinol A	0.84702	C29H42O4	455.314	455.778	2.68206	pos	[M+H]+	455.320116;187.147995;437.306507;145.100749;419.289726	level3	1.46452e+07
4-allyl-2-hydroxyphenyl 1-O-beta-D-apiosyl-(1->6)-beta-D-glucopyranoside	0.869735	C20H28O11	443.156	129.829	0.693946	neg	[M-H]-	149.060861;443.159155;293.084369;89.024601;59.01393	level3	1.4642e+07
6'-methoxy-2',4'-dihydroxy-3'-angeloyloxychalcone	0.704936	C21H20O6	369.132	251.95	0.192933	pos	[M+H]+	369.13015;337.106777;207.064939;351.1258;319.09743	level3	1.46217e+07
2'-hydroxyformononetin beta-D-glucoside|2-hydroxyformononetin 7-O-glucoside	0.703429	C22H22O10	445.113	226.486	1.80851	neg	[M-H]-	123.044366;445.114336;108.021687;252.063162;402.093572	level3	1.46216e+07
petunianine B	0.777717	C33H43NO6	550.314	275.316	1.71956	pos	[M+H]+	184.073687;550.315527;104.106685;86.096159;532.300813	level3	1.45962e+07
29-Norcycloartane-3,24-dione	0.759039	C29H46O2	425.343	521.327	1.77244	neg	[M-H]-	425.340749;423.325422;71.050311;337.255261;408.298072	level3	1.45954e+07
((aR,5S,6S,7S,8R)-8-acetoxy-5,6,7,8-tetrahydro-1,6,12-trihydroxy-2,3,10,11-tetramethoxy-6,7-dimethyldibenzo[a,c]cycloocten-5-yl) benzenecarboxylate|renchangianin A	0.852166	C31H34O11	583.217	282.815	0.210918	pos	[M+H]+	583.213283;167.070969;137.059281;565.204768;459.169913	level3	1.45863e+07
Arjunolic acid	0.999935	C30H48O5	487.332	507.649	19.8517	neg	M-H	487.335766;54.149674;488.344823;289.072649;167.033944	level1	1.45542e+07
3-Dehydro-15-deoxoeucosterol	0.998935	C29H44O4	455.317	484.987	1.25884	neg	[M-H]-	455.317139;411.325834;50.591058;456.323022;437.307791	level3	1.45197e+07
Sorokinianin	0.783324	C18H28O4	309.205	266.092	0.300716	pos	[M+H]+	147.043562;291.193352;309.206282;273.183618;81.069798	level3	1.44518e+07
Parviflorene G	0.980342	C30H32O3	441.245	212.046	0.109872	pos	[M+H]+	441.241977;442.245483;203.050783;107.049098;316.133202	level3	1.44461e+07
4,4'-O-di-beta-D-glucopyranosyl rosmarinic acid	0.672273	C30H36O18	683.172	54.4258	14.9463	neg	[M-H]-	341.086674;179.033992;191.056232;353.09029;151.003824	level3	1.44392e+07
crepidiaside D	0.971775	C29H34O12	573.196	257.425	1.3964	neg	[M-H]-	573.200438;145.029552;163.039671;119.05061;111.008854	level3	1.4427e+07
9-Hydroxy-4-methoxypsoralen 9-glucoside	0.656043	C18H18O10	393.08	136.874	6.06415	neg	[M-H]-	197.044865;393.082859;111.045361;125.023735;109.065316	level3	1.43497e+07
FA 18:3+1O	0.975227	C18H30O3	293.212	595.469	1.11166	neg	[M-H]-	293.210342;185.118745;125.097407;197.117781;131.046625	level2	1.43306e+07
Lycophlegmarine	0.662087	C18H27NO3	306.205	349.412	3.42187	pos	[M+H]+	86.096195;278.212991;147.116856;133.101392;151.11146	level3	1.43093e+07
(E)-2,6-Dimethyl-2,5-heptadienoic acid	0.790086	C9H14O2	155.106	655.539	2.87579	pos	[M+H]+	67.053852;109.101406;155.129524;55.054194;81.069305	level2	1.43002e+07
AKOS032948661	0.820978	C18H26O2	275.2	208.167	0.339773	pos	[M+H]+	275.054189;107.048855;232.034618;229.047659;105.069386	level3	1.41986e+07
(+/-)-Jasmonic acid	0.907965	C12H18O3	211.133	245.855	2.59081	pos	[M+H]+	147.116583;81.070016;211.095685;119.085555;165.126208	level2	1.41504e+07
baenzigeroside A	0.829638	C26H32O11	519.188	290.815	1.00204	neg	[M-H]-	167.034098;357.13131;519.328744;125.023921;339.122652	level3	1.41492e+07
Tyromycic acid F	0.846178	C30H42O3	451.32	506.685	0.0890883	pos	[M+H]+	451.330985;405.317605;433.311564;119.085526;95.0858	level3	1.41215e+07
13-O-alpha-rhamnopyranosyl-(+)-3beta-hydroxymanool-3-O-alpha-rhamnopyranosyl-(1-2)-beta-glucopyranoside	0.957151	C38H64O15	759.411	381.742	8.32007	neg	[M-H]-	759.42744;169.122808;327.218766;759.5028;597.268433	level3	1.41214e+07
sn-1-O-(cis-12-oxophytodienoyl)-sn-3-O-(beta-D-galactopyranosyl)glyceride	0.67956	C27H44O10	529.297	226.292	3.61051	pos	[M+H]+	107.04869;275.200881;367.246823;349.23512;81.06985	level3	1.41084e+07
Apigenin-7-glucuronide	0.861008	C21H18O11	445.077	181.348	0.878436	neg	M-H	269.047084;113.024914;445.147355;85.029656;59.013694	level1	1.40681e+07
Wilforlide A	0.871933	C30H46O3	455.351	406.432	0.785416	pos	[M+H]+	455.35464;437.341171;59.049154;123.11727;143.107466	level2	1.4061e+07
Episyringaresinol 4'-O-β-D-glncopyranoside	0.897922	C28H36O13	579.209	140.171	1.89833	neg	M-H	417.15366;181.049182;166.027819;387.108519;402.13088	level1	1.39671e+07
Quinceoxepine	0.878885	C12H18O	179.143	570.426	2.4746	pos	[M+H]+	179.033006;120.044523;67.053809;81.069315;95.084988	level2	1.39667e+07
Cynarin	0.725555	C25H24O12	515.12	48.8779	0.665324	neg	[M-H]-	111.008835;515.134846;191.056315;173.008992;87.008833	level2	1.39626e+07
butyl 3-(2,4-dihydroxy-5-methoxyphenyl)propionate	0.717721	C14H20O5	269.138	154.319	2.19388	pos	[M+H]+	269.081341;159.082674;93.069518;213.112285;81.069857	level3	1.39595e+07
Quercetin 5,7,3',4'-tetramethyl ether 3-galactoside	0.635462	C25H28O12	519.15	134.355	0.192777	neg	[M-H]-	357.131504;151.039628;191.056466;136.016353;519.15005	level3	1.39532e+07
Dinortrixagone	0.847662	C18H28O	261.22	544.952	1.17794	pos	[M+H]+	261.220996;243.210577;215.177088;93.069596;107.085831	level3	1.39518e+07
SCHEMBL672586	0.749676	C12H16O7	273.096	168.242	0.790921	pos	[M+H]+	273.072078;153.017895;147.044112;123.043971;83.049093	level3	1.39513e+07
Anthecotuloide	0.853715	C15H20O3	249.148	285.297	0.21886	pos	[M+H]+	137.05953;151.075288;121.100949;123.04347;95.085786	level3	1.38247e+07
Biochanin A 7-O-beta-D-glucoside-6''-O-malonate	0.712598	C25H24O13	531.114	47.6125	0.304797	neg	[M-H]-	325.071574;219.028416;531.099644;487.129326;369.028229	level3	1.38142e+07
(-)-8S,9S-dihydro-3beta-hydroxyconfertifolin|3beta-hydroxydihydroconfertifolin	0.880979	C15H24O3	253.179	291.784	0.287001	pos	[M+H]+	253.180618;235.166637;81.069852;95.085861;69.069822	level3	1.37921e+07
4-Hydroxy-3-methoxybenzaldehyde	0.946966	C8H8O3	151.04	41.6472	0.254429	neg	[M-H]-	136.015993;151.039013;123.045846;107.049871;109.048854	level2	1.37195e+07
SCHEMBL2640141	0.901482	C12H18O5	241.108	200.25	0.372294	neg	[M-H]-	197.117904;241.10742;179.108724;153.128832;71.049859	level3	1.37013e+07
Desoxyviperidon acetat	0.847434	C29H46O3	443.351	537.817	0.646345	pos	[M+H]+	443.352024;99.079953;95.085584;425.34886;81.06975	level3	1.36613e+07
Striatisporolide A	0.949487	C11H16O4	213.112	163.177	1.86714	pos	[M+H]+	213.113067;195.09985;123.043849;141.054942;55.054243	level3	1.36284e+07
[6]-Gingerdiol 5-acetate	0.973265	C19H30O5	337.205	726.817	0.416314	neg	[M-H]-	337.204456;96.959426;191.056765;79.957407;173.044732	level3	1.3599e+07
(-)-4,4',9'-trihydroxy-3',5'-dimethoxy-2,7'-cyclolignan 9-O-beta-D-glucopyranoside	0.719066	C26H34O11	521.204	135.055	1.49991	neg	[M-H]-	89.024298;59.013622;341.140073;326.114798;71.013608	level3	1.35982e+07
SCHEMBL4260984	0.852991	C14H20O	205.158	441.308	0.615664	pos	[M+H]+	205.157795;175.147004;145.101183;187.148156;107.085006	level3	1.3588e+07
octa-1,3,6-triene	1	C8H12	109.101	735.413	1.98342	pos	[M+H]+	109.101374;110.070667;67.053838;42.033839;68.049401	level3	1.35769e+07
9,10-Dihydro-10-(4-hydroxyphenyl)-pyrano[2,3-h]epicatechin-8-one	0.69046	C24H20O8	435.097	388.278	24.5757	neg	[M-H]-	435.107799;273.075121;167.036104;329.06816;125.025032	level3	1.35554e+07
5-Methoxyhinokinin	0.800929	C21H20O7	383.113	331.907	0.0102358	neg	[M-H]-	147.045463;383.117703;161.023896;79.957066;235.063197	level3	1.35547e+07
Versiconol acetate	0.670987	C20H18O9	401.087	143.569	1.80649	neg	[M-H]-	401.087596;191.034502;341.064822;329.067899;123.045853	level3	1.34835e+07
1-O-(3,4-Dihydroxy-2-methylenebutanoyl)-beta-D-glucopyranose	0.659485	C11H18O9	295.101	130.678	3.10657	pos	[M+H]+	69.033384;179.032524;115.039378;97.02812;295.188381	level3	1.34737e+07
Lobaric Acid	0.717384	C25H28O8	479.172	43.7002	17.5604	pos	[M+Na]+	224.091098;479.167213;178.084864;353.131691;138.054948	level2	1.34166e+07
THEOBROMINE	0.688947	C7H8N4O2	219.026	32.4057	2.14437	pos	[M+K]+	219.024224;86.096196;173.070541;201.130293;88.039471	level2	1.33499e+07
ent-6,16-Kauradien-19-oic acid	0.763541	C20H28O2	301.215	370.401	0.0290599	pos	[M+H]+	301.214292;255.210003;286.043616;109.101341;133.101356	level2	1.33414e+07
22-Dehydroclerosterol	0.99757	C29H46O	411.361	891.083	0.188674	pos	[M+H]+	411.366922;81.070009;83.085041;97.064974;69.069732	level2	1.32606e+07
2-Acetolactate	0.821409	C5H8O4	131.036	791.264	2.1284	neg	[M-H]-	131.035846;87.04501;89.014558;65.014634;113.926185	level3	1.32603e+07
Histamine	0.654018	C5H11Cl2N3	112.087	33.7711	3.91234	pos	[M+H]+	70.065153;112.086873;95.060381;96.044701;113.022852	level2	1.32242e+07
3-Oxo-11,13(18)-oleandien-28-oic acid	0.99355	C30H44O3	453.335	353.345	0.837864	pos	[M+H]+	453.332787;149.133203;454.341688;407.330929;107.084855	level3	1.3208e+07
Alfafuran	0.664112	C14H10O5	257.045	254.599	0.823425	neg	[M-H]-	213.056995;257.043711;211.040939;198.031041;195.044838	level3	1.31745e+07
2-(1,2-Dimethyl-3-methylenecyclopentyl)-5-methylphenol	0.982278	C15H20O	217.158	173.726	1.25896	pos	[M+H]+	217.157853;107.048674;79.053827;133.100939;137.096125	level3	1.31515e+07
3'-O-beta-D-glucopyranosyl 10-acetoxyoleuropein	0.872144	C33H44O20	759.23	42.9866	6.1038	neg	[M-H]-	435.129586;597.185968;273.075366;167.033921;191.055945	level3	1.31198e+07
5,7-dihydroxy-2-(4-hydroxy-3-methoxyphenyl)-6-(3-methylbut-2-enyl)-2,3-dihydrochromen-4-one	0.784695	C21H22O6	371.146	154.47	0.543105	pos	[M+H]+	371.147339;107.049006;287.091542;181.047971;209.154515	level2	1.31191e+07
Glaucocalyxin A	0.988247	C20H28O4	315.194	523.556	1.01247	pos	M+H-H2O	133.101312;189.089896;315.191832;316.323179;157.10072	level1	1.31098e+07
Masutakic acid A	0.671055	C10H16O4	199.097	176.621	3.31192	neg	[M-H]-	155.107912;199.098936;137.096634;181.086761;156.110087	level3	1.30633e+07
Phenylpropanolamine	0.724278	C9H13NO	152.106	362.291	3.77943	pos	[M+H]+	91.054326;117.069739;152.105093;110.059429;153.017604	level2	1.30382e+07
p-menthane-5,6-dihydroxy-3-carboxylic acid	0.98037	C11H20O4	215.129	261.981	1.95632	neg	[M-H]-	215.128692;197.117712;153.128468;216.131677;171.139528	level3	1.29695e+07
Desoxyrhaponticin	1	C21H24O8	405.15	38.2156	1.3084	pos	[M+H]+	405.14938;406.159153;162.022857;123.043777;99.043822	level2	1.29514e+07
2,3-dihydroxydodecane-4,7-dione	0.926391	C12H22O4	229.144	173.002	1.5626	neg	[M-H]-	229.143028;127.113136;125.097445;211.133139;155.144523	level3	1.29405e+07
(30E,34E)-2,6,10,14,18,22,26,30,34-nonamethyl-36-[3,4,5-trihydroxy-6-(hydroxymethyl)oxan-2-yl]oxyhexatriaconta-30,34-diene-2,6,10,14,18,22,26,27-octol	0.91571	C51H98O14	933.698	701.362	4.25682	neg	[M-H]-	933.689245;455.351646;934.683332;103.745215;456.357217	level3	1.29105e+07
Ajugasalicioside F	0.768704	C35H58O12	669.383	308.681	2.02753	neg	[M-H]-	669.380822;507.336521;150.068072;179.108495;327.220264	level3	1.2907e+07
Hypoxylonol A	1	C22H20O5	365.135	566.432	1.29476	pos	[M+H]+	365.136526;366.135647;203.050948;243.097643;99.155131	level3	1.28951e+07
3-(1-hydroxybutyl)-2,4-dimethylcyclopent-2-enone|phomotenone	0.882783	C11H18O2	183.137	285.58	1.18008	pos	[M+H]+	147.116389;165.126025;81.069907;123.117191;121.100969	level3	1.28854e+07
Picrasidine H	0.673169	C28H24N4O4	479.174	437.819	0.196332	neg	[M-H]-	59.013686;383.170988;479.103149;273.074865;193.014308	level3	1.28778e+07
Saikoisoflavonoside A	0.898759	C28H32O14	591.171	190.323	1.29936	neg	[M-H]-	591.170694;273.075269;167.033783;313.069235;207.029393	level3	1.28379e+07
(25R)-5beta-spirostane-1beta,2beta,3beta,4beta,5beta,6beta-hexol	0.746476	C27H44O8	497.31	563.451	0.0302825	pos	[M+H]+	497.304316;81.069673;95.085428;67.054089;335.260111	level3	1.28254e+07
2-(2-Hydroxyethyl)-5-(hydroxymethyl)-3,4-pyrrolidinediol	0.81857	C7H15NO4	178.108	895.665	0.817861	pos	[M+H]+	178.133517;56.013141;137.082465;136.086267;179.092707	level3	1.28215e+07
3-O-acetylaleuritolic acid	0.879007	C18H34O7	361.222	124.634	2.27229	neg	[M-H]-	361.224075;171.101764;299.137492;201.113749;273.172294	level3	1.28152e+07
5beta-hydroxy-4,9-oxidogermacr-11alpha-H,13-6,12-olide	0.692546	C15H24O4	269.174	352.868	1.61698	pos	[M+H]+	269.176668;81.069894;67.054256;93.06958;149.132953	level3	1.28151e+07
Wilfordic acid	0.830436	C11H13NO4	224.091	36.4689	1.27639	pos	[M+H]+	224.091101;160.075257;178.085023;132.080667;206.081083	level3	1.27917e+07
4,5-Di-O-caffeoylquinic acid	0.955041	C25H24O12	515.124	137.651	7.64937	neg	[M-H]-	173.044407;353.091071;179.034083;191.05639;111.008906	level2	1.27856e+07
Neuchromenin	0.741614	C13H12O5	249.075	55.2187	0.571193	pos	[M+H]+	105.033438;81.033405;249.074504;109.02773;69.033555	level3	1.27799e+07
ISOPALMITIC ACID	0.997744	C16H32O2	255.233	665.161	1.09221	neg	[M-H]-	255.233262;134.894228;136.892096;256.234556;135.894542	level2	1.27784e+07
Cryptocaryolone	0.837706	C12H20O5	243.124	190.367	1.85675	neg	[M-H]-	243.124985;225.112751;207.100952;181.122138;99.008082	level3	1.27655e+07
stigmasta-3,5,22-trien-7-one|stigmasta-3,5-diene-7-one	0.824186	C29H44O	409.345	669.793	1.04182	pos	[M+H]+	409.351479;95.084684;187.147026;163.147531;121.100673	level3	1.26835e+07
Eriojaposide B	0.69232	C25H40O11	517.263	149.865	0.130777	pos	[M+H]+	209.154114;191.143711;163.039688;69.033362;107.048753	level2	1.26692e+07
Aurantio-obtusin β-D-glucoside	0.696392	C23H24O12	491.118	94.3192	2.55983	neg	M-H	491.088881;161.023829;323.075687;167.033612;326.008647	level1	1.26329e+07
3beta-[(beta-D-glucopyranosyl)oxy]eudesma-4(14),11(13)-dien-12-ol	0.754273	C21H34O7	399.236	250.221	2.22834	pos	[M+H]+	167.070823;399.147418;245.077936;219.062727;107.048687	level3	1.2627e+07
Eriojaposide A	0.732197	C24H38O11	501.235	280.76	1.45452	neg	[M-H]-	111.008848;501.316311;173.00887;87.008874;191.055846	level3	1.26267e+07
Salasol B	0.670493	C33H38O10	593.246	140.171	1.4391	neg	[M-H]-	593.246438;251.127687;547.28058;207.139884;413.182174	level3	1.26106e+07
Glabrolide	1	C30H44O4	467.317	623.346	1.5413	neg	[M-H]-	467.314876;51.92462;468.322099;305.067982;423.337006	level2	1.25902e+07
Cibaric acid	0.720012	C18H28O5	325.201	361.264	1.85702	pos	[M+H]+	289.181207;81.069955;307.186326;95.086066;83.048909	level2	1.25856e+07
(1beta,4alphaH,5alpha,10betaH)-2beta,7alpha,8alpha-trihydroxy-10,11-epoxy-guaiane 2-O-beta-D-glucopyranoside|daucuside	0.750848	C21H36O9	431.228	327.334	0.490404	neg	[M-H]-	187.096919;431.223402;125.097548;261.133086;97.066267	level3	1.25841e+07
8alpha-methoxy-6beta-angeloyloxy-eremophil-7(11)-en-12,8beta-olid-15-oic acid|8alpha-methoxy-6beta-angeloyloxy-eremophil-7(11)-en-8beta,12-olide-15-oic acid	0.937985	C21H28O7	391.178	257.716	0.774403	neg	[M-H]-	391.181034;79.957338;80.96476;309.209516;96.959649	level3	1.24854e+07
genkwanine K	0.745412	C34H42O11	625.264	354.158	1.47973	neg	[M-H]-	625.269923;463.210111;357.174065;299.089179;273.075502	level3	1.2453e+07
(4E,6S*,8S*,10E,11aS*,14S*,14aS*,15S*,17aR*)-15-benzyl-9,11a,14,14a,15,16-hexahydro-6,8,13,14-tetramethyl[1,3]dioxacyclotridecino[4,5-d]isoindole-2,7,17(6H,8H)-trione|cytochalasin Z16	0.776562	C28H33NO5	464.241	235.461	1.7552	pos	[M+H]+	184.073212;104.1064;464.23996;86.096;124.999864	level3	1.24326e+07
4-[4-(3,4-dihydroxyphenyl)-2,3-dimethylbutyl]benzene-1,2-diol	0.89643	C18H22O4	325.138	45.8883	0.707702	pos	[M+Na]+	191.081137;325.139993;307.128437;81.033409;326.142719	level2	1.24287e+07
(-)-Isomuronic acid	0.83617	C21H34O5	367.247	429.764	0.3953	pos	[M+H]+	367.264314;349.241545;107.084709;275.201374;133.101032	level3	1.24274e+07
6-Methoxyisatin	1	C9H7NO3	178.049	925.522	0.115142	pos	[M+H]+	178.048058;179.033381;148.111919;136.039091;172.928542	level3	1.2398e+07
2-amino-4-ethylidenepentanedioic acid	1	C7H11NO4	172.063	815.257	0.888748	neg	[M-H]-	85.946051;174.081619;132.056742;147.067188;65.014465	level3	1.23942e+07
(2alpha,3beta,12beta)-3-(beta-D-glucopyranosyloxy)-2,12,21-trihydroxy-19-oxo-18,19-secours-13(18)-en-28-oic acid|bodinioside A	0.882277	C36H58O12	681.384	292.9	0.369799	neg	[M-H]-	681.385346;101.023748;619.382367;113.025045;85.029774	level3	1.2378e+07
7-Methyl-3-methylene-6-octen-1-ol-O-beta-D-(2',6'-O-diacetylglucopyranoside)|7-Methyl-3-methylene-6-octen-1-ol-O-beta-D-<2',6'-O-diacetylglucopyranoside>	0.788001	C20H32O8	401.216	293.964	0.806663	pos	[M+H]+	401.214035;83.085282;107.049088;55.054198;97.100742	level3	1.23728e+07
querspicatin A	0.998617	C39H54O6	617.383	720.727	0.754602	neg	[M-H]-	617.388604;161.024016;68.599206;618.389394;134.036843	level3	1.23601e+07
6,7-dihydroxy-3,4-dihydro-2H-isoquinolin-1-one	1	C9H9NO3	180.065	926.426	0.979205	pos	[M+H]+	120.04425;181.047785;138.054962;162.055048;180.065816	level3	1.23321e+07
4-METHYLCATECHOL	0.912855	C7H8O2	125.059	42.4893	1.43255	pos	[M+H]+	43.017698;97.064055;125.058792;126.054746;79.054136	level2	1.23094e+07
ent-Trachyloban-3-one	0.904767	C20H30O	287.236	491.43	0.421171	pos	[M+H]+	287.237831;201.164435;145.100934;119.085746;147.116797	level3	1.22994e+07
2-Methoxycinnamaldehyde	0.984439	C10H10O2	163.075	283.795	1.13861	pos	M+H	55.017902;163.07504;107.049006;135.080512;105.069523	level1	1.22876e+07
(3beta,6alpha,16beta,24R)-16-(acetyloxy)-24-hydroxy-25-(beta-D-xylopyranosyloxy)-9,19-cyclolanostane-3,6-diyl bis(6-deoxy-alpha-L-mannopyranoside)|eremophiloside B	0.817077	C49H82O18	959.566	807.674	0.287137	pos	[M+H]+	959.560155;959.488806;681.341081;960.559551;519.294822	level3	1.22854e+07
Acetoxyaurapten	0.929757	C21H24O5	355.158	768.989	0.993329	neg	[M-H]-	355.154492;116.927774;100.933644;84.938625;99.92621	level3	1.22708e+07
Caffeine	0.989978	C8H10N4O2	195.087	47.781	0.978586	pos	[M+H]+	195.086817;138.064918;110.070658;177.054187;196.091427	level2	1.22557e+07
Apohemanthamine	0.840001	C16H15NO3	270.112	264.182	1.7829	pos	[M+H]+	182.096475;242.117639;210.091017;165.070442;270.112132	level3	1.2246e+07
5,7-dihydroxy-2',6-dimethoxyisoflavone	0.861625	C17H14O6	313.072	377.033	0.335043	neg	[M-H]-	207.029405;313.068824;179.034139;165.0186;93.034744	level3	1.22411e+07
Yohimbine	0.629914	C21H26N2O3	413.209	635.764	0.176794	neg	M+CH3COO	277.216072;152.996284;413.203961;78.959374;118.848084	level1	1.21943e+07
2alpha-hydroxy-3-oxo-D:A-friedooleanan-28-ioic acid|2alpha-hydroxy-3-oxo-D:A-friedooleanan-28-oic acid	0.770794	C30H48O4	473.362	620.026	1.62606	pos	[M+H]+	427.360607;473.366553;207.172257;201.164069;189.164872	level3	1.21779e+07
pollenopyroside A	0.657929	C12H15NO5	254.101	44.9781	1.15402	pos	[M+H]+	254.103101;81.033124;206.080793;188.069822;236.092119	level3	1.21547e+07
Kaempferol-3-O-glucoside-6''-p-coumaroyl	0.961851	C30H26O13	593.128	202.891	2.90402	neg	[M-H]-	593.124686;285.039066;284.030951;447.09414;125.024582	level2	1.21307e+07
Patavine	0.947161	C36H40O19	775.21	176.393	1.87819	neg	[M-H]-	775.217602;367.086024;243.027559;715.189204;229.012991	level3	1.2127e+07
SCHEMBL9275272	0.999258	C25H30O12	523.179	213.043	2.12267	pos	[M+H]+	523.17663;89.05957;524.181942;461.17181;329.080297	level3	1.21254e+07
Officinoside B	0.814427	C19H32O8	389.217	123.437	2.84666	pos	[M+H]+	209.154233;227.162301;107.048703;191.143846;133.101053	level3	1.20585e+07
7-oxo-8-en-acamptoic acid methyl ester	0.840577	C27H40O8	491.265	475.475	0.69045	neg	[M-H]-	491.25863;115.087789;262.153811;54.585561;326.185474	level3	1.2006e+07
3-(methoxycarbonyl)propyl beta-D-glucopyranoside|3-(Methoxycarbonyl)propyl-??-D-glucopyranoside	0.795298	C11H20O8	279.108	35.312	0.393613	neg	[M-H]-	279.109117;59.013754;117.055294;89.024473;71.013794	level3	1.19724e+07
(+)-1,2-Dehydropinidinol	0.69573	C9H17NO	156.138	735.8	2.60148	pos	[M+H]+	156.138469;139.110596;97.100672;69.069935;55.054155	level3	1.19702e+07
6-Methoxy-8-(1-hydroxy-1-methylethyl)-7,8-dihydro-1,3-dioxolo[4,5-h]furo[2,3-b]quinoline	0.735253	C16H17NO5	304.117	70.0155	1.32796	pos	[M+H]+	304.114835;286.107407;178.084899;227.092319;240.100135	level3	1.1956e+07
Irisoquin-F	0.999429	C29H50O4	461.364	800.14	1.92585	neg	[M-H]-	461.358584;51.263202;462.37022;443.349422;399.3584	level3	1.19143e+07
penicillitone	0.641256	C28H40O5	455.278	665	0.547667	neg	[M-H]-	455.305617;255.232047;50.590206;419.299464;163.061737	level3	1.18937e+07
4beta,5alpha-epoxide-10alphaH-xanthan-1(2),11(13)-dien-7beta,8beta-olide	0.92761	C15H20O3	249.148	362.63	0.334355	pos	[M+H]+	249.149623;207.136623;203.14124;231.138257;147.11648	level3	1.18845e+07
Cypellocarpin A	0.851634	C23H30O12	497.165	174.791	1.03193	neg	[M-H]-	497.166033;168.00714;125.023718;149.995448;124.016402	level3	1.18741e+07
(R)-6-hydroxymellein 6-O-beta-D-[6-O-(4-methoxybenzoyl)]->6)glucopyranoside	0.608118	C24H26O11	489.14	199.463	0.930241	neg	[M-H]-	151.039285;136.015962;337.092851;175.03921;160.015728	level3	1.17942e+07
Coumingine	0.943152	C29H47NO6	504.33	429.86	0.266908	neg	[M-H]-	504.334248;486.317224;503.328861;56.037467;505.346057	level3	1.17916e+07
2,3-Dicarboxy-2,3-secomanoyl oxide	0.999458	C20H32O5	353.229	312.983	0.568634	pos	[M+H]+	353.226187;267.110685;354.232185;135.116351;113.058952	level3	1.17623e+07
12-(dehydrocacalohastin-14-yl)-cacalol	0.615418	C31H32O4	469.239	195.438	1.25342	pos	[M+H]+	184.073623;469.243045;104.106665;185.076084;86.096167	level3	1.1761e+07
2-(2'-Hydroxypentyl)piperidin	0.879661	C10H21NO	172.169	396.456	0.76766	pos	[M+H]+	172.169535;88.075203;102.091407;57.069583;74.059706	level3	1.17588e+07
Azadirachtin B	0.657266	C33H42O14	645.252	259.432	1.58242	pos	M+H-H2O	167.068854;417.155341;107.049061;181.048148;211.096142	level1	1.17532e+07
3beta-acetoxyclerodinin C	0.669236	C28H42O10	539.287	634.314	0.699109	pos	[M+H]+	539.281592;239.236579;109.027531;313.272429;95.085047	level3	1.17406e+07
dihydro-5-myristoyl-2(3h)-furanone	0.968764	C18H32O3	295.227	542.689	0.322779	neg	[M-H]-	295.227173;183.139721;277.21598;134.894005;171.101875	level3	1.1735e+07
(23R)-3beta-Acetoxy-17,23-epoxy-veratra-5,12-dien-11-on|(23R)-3beta-acetoxy-17,23-epoxy-veratra-5,12-dien-11-one|3-O-acetyljervine|O-acetyl-jervine|O-acetyljervine	0.706016	C29H41NO4	468.307	509.519	0.41648	pos	[M+H]+	184.073651;104.106678;468.302741;86.09617;124.999795	level3	1.16898e+07
(E,E)-2,4-Hexadienedial	0.812476	C6H6O2	111.044	9.27956	3.60528	pos	[M+H]+	111.044398;69.069936;55.054169;83.048802;43.017696	level2	1.1676e+07
Usambarine	0.694514	C30H34N4	449.276	255.601	1.53218	neg	[M-H]-	449.278937;287.223534;59.013729;305.048667;101.024859	level3	1.16702e+07
Alisol B	1	C30H48O4	495.343	572.472	0.0153554	pos	[M+Na]+	495.340433;496.346744;55.039015;184.073821;451.3581	level2	1.16691e+07
Crenulatoside A	0.64787	C27H46O10	529.302	613.365	0.277146	neg	[M-H]-	529.298982;279.232705;113.025054;249.062665;85.02903	level3	1.16656e+07
(3beta)-3-O-(sulfo)lup-20(29)-en-23,28-dioic acid 28-O-beta-D-glucopyranosyl ester|gypsophilinoside	0.783917	C36H56O13S	727.332	411.682	1.74544	neg	[M-H]-	727.327893;565.279444;417.226836;167.035421;125.02504	level3	1.16278e+07
8-O-Methylretusin-7-O-beta-D-glucopyranoside	0.828733	C23H24O10	459.13	239.394	1.95596	neg	[M-H]-	297.074301;191.034121;203.033694;459.130593;149.023458	level3	1.16234e+07
1,2,3-tri-O-hexanoyl-alpha-glucopyranose	0.614677	C24H42O9	473.276	334.938	1.09796	neg	[M-H]-	473.275659;59.013821;293.211702;89.024733;311.224477	level3	1.16142e+07
AZELATE	0.820734	C9H16O4	153.091	640.469	2.40825	pos	[M-2H2O+H]+	153.113186;107.084615;135.080179;111.079527;109.064136	level2	1.16121e+07
(6R,7R,8R)-8-Methoxygoniodiol	0.801248	C14H16O4	249.111	116.427	2.57187	pos	[M+H]+	249.111934;159.080812;187.074518;204.079367;131.084255	level3	1.16038e+07
11,12-dehydrodaucenal	0.952359	C15H20O	217.158	330.82	1.2316	pos	[M+H]+	217.157842;157.100321;161.095811;199.14825;131.085562	level3	1.15953e+07
bourjotinolone A	0.917776	C29H46O4	459.346	566.415	0.998859	pos	[M+H]+	459.346674;441.330876;423.328611;205.157558;203.14403	level3	1.15703e+07
Sclerin	0.850262	C13H14O4	235.096	121.377	0.995615	pos	[M+H]+	235.098112;191.070778;95.049019;147.043491;107.084566	level3	1.15615e+07
1alpha-hydroperoxy-4beta,8alpha,10alpha,13-tetrahydroxyguaia-2-en-12,6alpha-olide	0.663846	C15H22O8	329.123	89.9125	1.94273	neg	[M-H]-	167.033655;285.073895;329.108176;243.064763;59.013697	level3	1.15401e+07
Cyclopassifloside II	0.973133	C37H62O11	681.422	411.798	1.11768	neg	[M-H]-	635.411395;681.432986;87.008863;101.023764;81.524624	level3	1.15003e+07
1-(3,4-Dihydroxyphenyl)-2-hydroxyethanone	0.849153	C8H8O4	169.049	952.833	0.822077	pos	[M+H]+	169.048369;151.037874;43.017678;141.05482;123.044049	level3	1.1495e+07
CHEBI:139439	0.757971	C17H32O10	395.193	78.8778	1.7654	neg	[M-H]-	249.133929;101.023809;395.194747;59.013887;71.013916	level3	1.14857e+07
Illudin J2	0.795888	C15H22O3	251.164	355.792	0.962494	pos	[M+H]+	223.167537;205.157265;95.085801;111.0443;251.163256	level3	1.14801e+07
Scortechinone J	0.735891	C34H42O7	561.291	239.691	0.0949186	neg	[M-H]-	561.283862;89.024443;71.013776;101.023685;119.034737	level3	1.14653e+07
3-O-(2-methylbutyryl-5-O-isobutyryl)-4-O-decanoyl-shikimic acid methyl ester|3-O-<2-methylbutyryl-5-O-isobutyryl>-4-O-decanoyl-shikimic acid methyl ester	0.85035	C27H44O8	497.31	495.603	0.626335	pos	[M+H]+	497.291095;335.257775;81.069362;67.053877;95.085054	level3	1.14558e+07
6R,7E,9R-megastigma-4,7-dien-3-one 9,13-di-O-beta-D-glucopyranoside	0.909085	C25H40O13	549.253	58.8875	0.202273	pos	[M+H]+	207.135923;95.085759;549.1986;149.09588;123.079513	level3	1.14552e+07
glucer-1-yl dendryphiellate A	0.651282	C12H20O4	229.143	318.326	0.102703	pos	[M+H]+	109.101133;67.054243;229.142123;173.116355;57.033209	level3	1.14474e+07
(?)-9,10-Dihydro jasmonic acid	0.914187	C12H18O3	211.132	347.832	2.22431	pos	[M+H]+	81.033358;193.120932;211.128408;83.048887;55.054083	level3	1.14449e+07
Dihydroferuperine	0.686792	C17H23NO3	290.174	62.0837	0.673489	pos	[M+H]+	147.080327;272.164338;290.176167;126.090552;115.054426	level2	1.1435e+07
3-O-beta-Gentiobiosyl-3beta,14-dihydroxy-5alpha,14beta-pregnan-20-one	0.845682	C33H54O13	659.362	495.487	0.130453	pos	[M+H]+	335.257575;85.028508;97.028377;659.363968;91.038929	level3	1.14325e+07
26-nor-11,23-dioxo-5alpha-lanost-8-en-3beta,7beta,15alpha,25-tetrol	0.983741	C29H46O6	489.322	342.63	0.118167	neg	[M-H]-	489.317545;73.029375;54.369859;327.121785;490.332523	level3	1.14183e+07
2-Phenylpropanal	0.983009	C9H10O	135.08	640.575	1.29929	pos	[M+H]+	135.080501;79.053932;107.084888;55.017954;136.063273	level2	1.14119e+07
(1R,3aS,5aR,5bR,7aR,8S,9R,11aR,11bR,13aR,13bS)-9-acetyloxy-1-(3-hydroxyprop-1-en-2-yl)-5a,5b,8,11a-tetramethyl-1,2,3,4,5,6,7,7a,9,10,11,11b,12,13,13a,13b-hexadecahydrocyclopenta[a]chrysene-3a,8-dicarboxylic acid	0.827965	C32H48O7	543.332	519.729	0.562833	neg	[M-H]-	471.342133;469.334039;453.341979;439.321472;451.323897	level3	1.14119e+07
J3.578.828J	0.76739	C18H18O7	347.111	107.641	1.36493	pos	[M+H]+	107.048983;329.102554;181.048215;223.059944;347.122802	level3	1.13814e+07
anatolioside	0.728288	C22H38O10	461.239	301.167	0.172361	neg	[M-H]-	461.174803;59.01376;415.22787;100.933638;401.155234	level3	1.13322e+07
CHEMBL507982	0.782004	C18H16O5	313.106	200.346	0.203338	pos	[M+H]+	253.08447;313.105123;285.111019;225.092483;161.059063	level3	1.13313e+07
D-(+)-Cellobiose	0.949006	C12H22O11	325.112	47.0628	0.107512	pos	M+H-H2O	85.028261;127.038866;145.050291;97.028154;69.033293	level1	1.12829e+07
(5S,6E)-5-beta-D-glucopyranosyloxy-3-hydroxy-3,7,11-trimethyldodeca-1,6,10-triene|amarantholidoside III	0.708542	C21H36O7	399.238	360.387	2.65858	neg	[M-H]-	71.013637;59.013649;101.024694;89.024317;113.024742	level3	1.12724e+07
Methylsuccinic acid	0.984865	C5H8O4	131.035	38.4393	1.39887	neg	[M-H]-	87.044959;131.034202;113.023735;69.034342;88.047669	level3	1.12534e+07
acacetin 7-rutinoside	0.932247	C27H30O12	545.167	199.748	1.89783	neg	[M-H]-	545.167824;145.029249;163.039202;119.050404;381.118805	level3	1.12298e+07
14-Deoxy-11,12-didehydroandrographolide	0.950626	C20H28O4	315.193	545.33	0.103311	pos	M+H-H2O	315.191812;133.101162;189.088926;211.094712;210.09115	level1	1.12235e+07
Silybin B	0.683828	C25H22O10	481.098	39.7137	27.3478	neg	[M-H]-	187.017041;89.02456;59.013845;71.013842;481.107778	level2	1.11973e+07
3-HYDROXYTETRADECANOIC ACID	0.978773	C14H28O3	243.196	572.365	1.61391	neg	[M-H]-	59.013779;243.1968;243.790097;197.190848;60.993267	level3	1.11854e+07
CHEMBL298115	0.764003	C10H13N5	204.124	808.352	2.33642	pos	[M+H]+	204.124776;163.097337;187.099109;122.071442;136.08656	level3	1.11775e+07
(S)-4-(4-Methylphenyl)-2-pentanone	0.862677	C12H16O	177.127	313.115	1.94233	pos	[M+H]+	177.127624;159.116978;145.027561;93.069896;133.101398	level2	1.11706e+07
3-METHOXY-5-NONADECYLPHENOL	0.883334	C26H46O2	391.355	843.462	1.50632	pos	[M+H]+	391.358088;125.06023;139.075092;167.105184;153.09039	level3	1.11384e+07
cis-Hexadec-11-en-7,9-diynoic acid	0.876885	C16H22O2	247.168	436.574	1.17619	pos	[M+H]+	201.164484;247.169674;145.101002;119.08576;159.117166	level3	1.11304e+07
Dehydrophytosphingosine	0.852639	C18H37NO3	316.284	458.961	1.23511	pos	[M+H]+	60.044195;316.323182;298.274852;106.086419;57.069596	level2	1.11096e+07
6'-Hydroxysordarin	0.90546	C27H40O9	507.262	377.176	1.57403	neg	[M-H]-	507.256577;401.222956;172.109964;262.158425;56.363619	level3	1.11017e+07
Decanedioic acid	0.995614	C10H18O4	201.113	205.148	1.70879	neg	[M-H]-	201.113577;139.112479;183.101511;57.034489;111.081923	level2	1.10956e+07
Celastrol	0.782713	C29H38O4	473.264	456.829	1.43712	pos	[M+Na]+	59.059993;473.243012;221.097716;95.086069;62.919563	level2	1.10953e+07
Carlinoxide	0.789152	C13H14O	187.111	199.786	0.349935	pos	[M+H]+	187.111378;159.117019;144.093034;119.085656;172.08784	level3	1.10952e+07
Vitexin-2''-O-rhamnoside	0.920266	C27H30O14	579.169	80.1114	2.55159	pos	[M+H]+	433.112292;579.169562;313.071984;415.097509;397.088028	level2	1.10377e+07
Dihydrogossypetin 7,8-dimethyl ether	0.854598	C17H16O8	347.077	47.8398	0.394224	neg	[M-H]-	347.077187;303.088417;329.067746;259.098384;109.029495	level3	1.10321e+07
SCHEMBL6239734	0.802075	C27H30O17	627.152	85.9814	1.2408	pos	[M+H]+	303.0484;85.028439;465.094559;304.051556;203.033531	level3	1.10012e+07
(-)-(3S,6R)-3,6-dihydroxy-10-methylundecanoic acid|(3S,6R)-3,6-dihydroxy-10-methylundecanoic acid	0.848385	C12H24O4	231.16	161.853	0.158101	neg	[M-H]-	231.158687;75.008792;171.10208;213.150731;229.143159	level3	1.09943e+07
corymbone B	0.797913	C31H38O7	521.251	442.708	0.839406	neg	[M-H]-	293.210264;521.246922;152.996159;78.959331	level3	1.09817e+07
Vertilecanin A methyl ester	0.693916	C14H13NO3	244.096	54.211	1.52298	pos	[M+H]+	244.096804;96.043591;103.053921;131.048269;107.048943	level3	1.09594e+07
17-hydroxygrindelic acid methyl ester|methyl 17-oxygrindelate	0.968768	C21H34O4	351.251	289.896	1.53352	pos	[M+H]+	351.210751;277.218116;67.054327;81.069805;93.069525	level3	1.09497e+07
2-Oxoadipic Acid	0.916752	C6H8O5	159.03	35.6529	0.508298	neg	[M-H]-	115.040388;159.029479;71.05056;87.045002;97.029481	level2	1.09434e+07
??,??-Digalactosyl-??'-linolenic-glyceride	0.727002	C33H56O14	675.357	495.736	2.88494	neg	[M-H]-	277.215944;397.135459;415.146679;101.024638;89.024218	level3	1.09273e+07
Fusarine	0.628207	C14H15NO3	246.112	148.901	1.80189	pos	[M+H]+	228.10212;246.109698;200.10712;186.089884;229.102784	level3	1.09111e+07
creoside III	0.754633	C18H24O9	383.135	200.923	3.33137	neg	[M-H]-	221.082707;383.117523;177.092536;179.071935;339.124523	level3	1.08471e+07
O-beta-D-Glucopyranoside-(R)-2-Hydroxy-5-megastigmen-9-one	0.646007	C19H32O7	373.221	160.709	1.25976	pos	[M+H]+	211.169175;109.100999;135.11616;193.157851;175.146573	level3	1.08391e+07
Periplogenin	0.991752	C23H34O5	391.244	527.956	1.34547	pos	[M+H]+	391.246633;392.251276;95.084958;187.148278;119.085741	level2	1.08317e+07
Demethylstriatol|Mono-norstriatol	0.764901	C27H40O4	429.299	446.47	0.383006	pos	[M+H]+	429.297272;121.101194;135.11625;95.084907;203.179124	level3	1.07497e+07
7-methoxy averufin	0.725251	C21H18O8	399.107	193.899	1.39531	pos	[M+H]+	399.109201;107.048919;125.023229;181.047966;169.048136	level3	1.07413e+07
Jasmonic acid	0.970402	C12H18O3	209.118	254.863	0.146161	neg	[M-H]-	59.013755;209.118762;165.127801;109.065243;85.029703	level2	1.07307e+07
3-methoxy-1-methyl-1,2-dihydro-4-quinolinol	0.997892	C11H13NO2	192.101	35.7987	2.56077	pos	[M+H]+	192.102775;94.065101;193.103761;164.069741;146.096156	level3	1.07055e+07
Multiforisin A	0.703142	C11H12O5	223.061	105.651	0.197761	neg	[M-H]-	91.054719;223.059682;163.039058;161.060843;133.066323	level3	1.06656e+07
8,13-DIHYDROXYOCTADECA-9,11-DIENOIC ACID	0.942512	C18H32O4	311.222	542.127	0.210566	neg	[M-H]-	311.222053;249.223514;293.210293;183.012414;267.234288	level3	1.06616e+07
Tetrahydrocannabivarol	1	C19H26O2	285.186	491.239	0.685851	neg	[M-H]-	285.183283;286.189685;270.163145;257.043792;241.048833	level3	1.0648e+07
pectolinarigenin-7-O-beta-D-glucopyranoside	1	C23H24O10	459.13	186.159	2.27982	neg	[M-H]-	193.049652;460.13575;194.054535;342.102465;178.026035	level3	1.06333e+07
Rhodioloside B	0.676325	C22H38O12	495.243	54.8919	2.54387	pos	[M+H]+	153.126455;171.137846;85.028218;135.115982;97.064813	level3	1.06179e+07
Pinoresinol	0.984506	C20H22O6	341.138	226.083	0.204151	pos	M+H-H2O	137.059771;291.103436;271.094698;323.130427;341.138898	level1	1.05692e+07
Uncarinic acid A	0.802039	C40H56O7	649.407	677.75	1.29331	pos	[M+H]+	177.053566;437.339508;195.063354;145.027137;203.178853	level3	1.05326e+07
10-O-foliamenthoylaucubin	0.93259	C25H36O11	511.217	296.045	2.08924	neg	[M-H]-	511.2145;152.01117;108.021588;109.029788;153.055653	level3	1.05303e+07
4-O-beta-D-glycopyranosyl-conduritol F	0.767435	C12H20O9	309.117	101.775	0.791692	pos	[M+H]+	147.044005;85.028451;291.087233;309.093746;129.054763	level3	1.04858e+07
(all-E)-octadeca-2,9,11,13,15-pentaenal|pseudogynoxal	0.768533	C18H26O	259.205	312.431	0.258664	pos	[M+H]+	259.205693;175.147126;133.101423;137.096527;119.085783	level3	1.04506e+07
(-)-3,16-dioxolanosta-8,24-dien-21-oic acid|pinicolic acid B	0.888469	C30H42O4	467.314	328.684	1.09888	pos	[M+H]+	467.318312;421.305631;107.08584;95.08565;119.085297	level3	1.03978e+07
EVELYNIN	0.814769	C19H20O7	361.128	241.494	2.10785	pos	[M+H]+	329.102335;361.125082;179.07044;333.13044;207.065139	level3	1.03956e+07
Ricinoleic acid (purity≥99%)	0.955232	C18H34O3	315.254	501.185	0.0687621	neg	M-H+H2O	315.254285;313.235789;297.241056;171.101608;141.129073	level1	1.03446e+07
taxagifine III	0.70038	C24H34O11	497.202	245.995	2.07854	neg	[M-H]-	125.023802;497.206191;57.034396;149.0238;371.17388	level3	1.03341e+07
6alpha-(5-hydroxytigloyloxy)-goyazensanolide	0.714606	C20H22O7	375.143	156.394	0.459307	pos	[M+H]+	375.143935;357.132362;253.085942;73.028126;137.060207	level3	1.03115e+07
3-geranyl-4-hydroxy-6-(2-hydroxypropyl)-2-pyrone|aurantiacone|geranyl-alpha-pyrone (+/-)-aurantiacone	0.84687	C18H26O4	305.175	523.475	0.691084	neg	[M-H]-	305.176675;168.04354;153.019172;167.03361;140.010778	level3	1.03024e+07
benzyl-O-alpha-L-rhamnopyranosyl (1->6)-beta-D-glucopyranoside	0.858515	C19H28O10	415.161	57.6511	3.11866	neg	[M-H]-	269.104054;101.024482;71.013545;59.013592;415.166696	level3	1.02703e+07
Nobiletin	0.807251	C21H22O8	425.123	304.494	1.21128	pos	[M+Na]+	323.087875;351.08451;425.1216;308.067737;263.06908	level2	1.02455e+07
(all-E)-hexadeca-2,7,9,11,13-pentaenal	0.824985	C16H22O	231.173	379.881	2.37617	pos	[M+H]+	231.171997;161.096354;175.110847;213.162064;147.116946	level3	1.01877e+07
(2R,3R,4S,5S,6R)-2-[1,7-bis(4-hydroxyphenyl)heptan-3-yloxy]-6-[[(2S,3R,4R)-3,4-dihydroxy-4-(hydroxymethyl)oxolan-2-yl]oxymethyl]oxane-3,4,5-triol	0.958491	C30H42O12	593.263	365.933	0.376744	neg	[M-H]-	593.263973;80.964789;225.007994;79.957357;164.985344	level2	1.01771e+07
Esculetin 6-O-brta-D-[6'(3-hydroxy-3-methylglutaryl)]glucoside	0.67529	C21H24O13	483.114	42.3932	0.582982	neg	[M-H]-	125.023857;321.063227;277.072381;233.081411;153.019379	level3	1.0153e+07
Aloesaponarin I 3-methyl ether	0.655039	C18H14O6	327.085	194.241	2.39111	pos	[M+H]+	327.083833;299.092012;235.037728;267.06352;266.055527	level3	1.01476e+07
methyl 9-hydroxy-cis-11-octadecanoate	0.700017	C19H36O3	313.272	578.552	2.4006	pos	[M+H]+	313.273002;57.069552;71.085568;85.100954;95.084836	level3	1.00974e+07
2-[4-(beta-D-glucopyranosyloxy)-2-hydroxy-6-methylbenzyl]-5-hydroxy-3-methylphenyl beta-D-glucopyranoside|orcinoside C	0.825487	C27H36O14	583.199	656.943	1.1701	neg	[M-H]-	583.195572;100.933447;78.959399;152.996634;116.927882	level3	1.00783e+07
Esculentic acid (Diplazium)	1	C30H48O5	511.338	498.957	0.0544907	pos	[M+H]+	511.344961;512.34562;467.354884;56.816369;468.350935	level2	1.00776e+07
2-Oxo-4-(3,4-dihydroxyphenethyl)-2H-pyran-6-carboxylic acid	0.624277	C14H12O6	275.058	62.3189	8.39609	neg	[M-H]-	275.056802;125.023679;231.065651;81.034752;119.050379	level3	1.00498e+07
[1R-(1alpha,4beta,4abeta,6alpha,8aalpha)]-4-Ethoxy-1,2,3,4,4a,5,6,8a-octahydro-6-hydroxy-4,7-dimethyl-a-methylene-1-naphthaleneacetic acid methyl ester	0.726816	C18H28O4	307.191	304.123	0.909758	neg	[M-H]-	307.189351;185.118773;220.979087;262.987285;289.1777	level3	1.00033e+07
Hexaspermone B	0.742697	C34H30O10	597.163	188.515	15.763	neg	[M-H]-	163.038813;227.083434;98.02453;119.050138;597.167624	level3	9.95625e+06
Nalgiovensin	0.746379	C18H16O6	329.102	282.838	1.77416	pos	[M+H]+	301.106618;329.102283;269.080706;241.084998;286.083624	level3	9.95517e+06
Coniferyl ferulate	0.893931	C20H20O6	339.122	225.232	1.03285	pos	M+H-H2O	177.053642;339.124743;97.100465;307.096462;143.105499	level1	9.95131e+06
1,6,7-TRIMETHYLNAPHTHALENE	0.63441	C13H14	171.117	259.053	3.40679	pos	[M+H]+	171.116881;156.094101;46.064903;89.070728;55.05415	level3	9.89657e+06
Alisol A	0.999937	C30H50O5	489.359	462.486	1.10584	neg	M-H	489.356329;54.373712;490.357974;345.282725;289.073345	level1	9.89356e+06
CHEMBL2047549	0.752761	C13H14O4	235.091	163.501	22.6965	pos	[M+H]+	235.167448;167.070958;149.095793;107.084649;217.157056	level3	9.8857e+06
ingol 3,7,12-triacetate 8-(phenylacetate)	0.72644	C34H42O10	609.267	415.101	0.593476	neg	[M-H]-	609.258587;293.211287;152.996743;241.013424;78.959376	level3	9.87379e+06
Hemislienoside	0.862083	C27H32O11	531.188	299.08	1.26328	neg	[M-H]-	369.129918;263.093481;531.292158;275.090026;125.023478	level3	9.87217e+06
MEGxm0_000489	0.748437	C14H20O3	237.148	187.066	1.3945	pos	[M+H]+	99.043745;237.149294;133.101344;151.11138;93.069796	level3	9.86278e+06
SCHEMBL6266796	0.69179	C13H14O4	235.096	220.748	1.47645	pos	[M+H]+	173.058974;145.064826;235.167417;217.083967;205.086377	level3	9.84539e+06
Chaulmoogric Acid	0.958264	C18H32O2	298.273	453.893	1.5128	pos	[M+NH4]+	298.274268;71.085567;81.069229;95.084935;299.258681	level2	9.84228e+06
maytensifolin A|Maytensifolin-A	0.817964	C29H48O3	445.366	888.86	0.408412	pos	[M+H]+	445.364485;139.07513;69.069964;57.069557;83.085215	level3	9.83594e+06
Viburtinal	0.940121	C10H8O2	161.059	244.729	1.594	pos	[M+H]+	161.059349;105.069426;146.036778;162.053839;118.04126	level2	9.81897e+06
12beta-hydroxycoroglaucigenin	0.991223	C23H34O6	407.239	405.951	0.399634	pos	[M+H]+	407.242116;408.235804;107.049111;133.101007;301.289799	level3	9.81634e+06
octadeca-2t,9c,16t-triene-12,14-diynal	0.65419	C18H22O	255.173	415.589	0.429066	pos	[M+H]+	255.175603;109.101203;237.162304;95.084866;195.116016	level3	9.79306e+06
(E)-labda-8(17),12,14-trien-15(16)-olide	0.794728	C20H28O2	301.215	460.684	0.221088	pos	[M+H]+	301.214272;133.101328;163.110095;119.08563;71.049003	level3	9.79062e+06
Dehydroandrographolide	1	C20H28O4	333.203	406.68	0.530149	pos	[M+H]+	333.203492;334.240544;133.101356;167.068828;159.117027	level2	9.77311e+06
4alpha,5alpha-epoxy-6alpha-hydroxy amorphan-12-oic acid|4alpha,5alpha-epoxy-6alpha-hydroxyamorphan-12-oic acid|4??,5??-Epoxy-6??-hydroxy amorphan-12-oic acid	0.967654	C15H24O4	267.159	393.377	1.89674	neg	[M-H]-	223.171568;267.160928;205.158077;249.148433;231.137481	level3	9.75515e+06
niloticin	0.862805	C29H46O3	443.351	391.68	0.153905	pos	[M+H]+	443.351937;425.340794;407.329156;107.085892;147.116064	level3	9.74616e+06
Ursonic acid	0.999801	C30H46O3	453.338	743.341	1.63392	neg	[M-H]-	453.340989;50.371515;454.339148;116.927835;471.698281	level2	9.73726e+06
Cafestol	1	C20H28O3	317.207	569.39	2.23264	pos	[M+H]+	317.20961;318.208836;262.145689;187.277405;95.086069	level2	9.71685e+06
(2R,3R,4R,5R,6S)-2-[[(2R,3S,4S,5R,6S)-6-(4-ethenylphenoxy)-3,4,5-trihydroxyoxan-2-yl]methoxy]-6-methyloxane-3,4,5-triol	0.726494	C20H28O10	427.16	255.666	0.94425	neg	[M-H]-	219.102454;111.008857;164.048246;427.199623;205.447532	level2	9.71364e+06
5-carboxy-2,3-dihydro-2-(1',5'-dimethyl-1'E,4'-hexadienyl)-7-(3''-methyl-2''-butenyl)benzofuran|myrsinoic acid F	0.75367	C22H28O3	339.199	842.72	0.0569033	neg	[M-H]-	339.197427;183.011915;160.842678;302.918085;184.020818	level3	9.7095e+06
scutehenanine A	0.758699	C26H31NO6	454.219	161.786	0.629867	pos	[M+H]+	184.073786;104.106769;454.215429;86.09623;124.999921	level3	9.70224e+06
6''-O-acetylplumieride p-E-coumarate	0.918518	C33H36O14	655.208	633.481	0.858404	neg	[M-H]-	655.203385;116.92777;100.933519;80.96477;255.233396	level3	9.68157e+06
1-(beta-D-Glucopyranosyloxy)-3-octanone	0.655725	C14H26O7	307.174	98.2995	0.799832	pos	[M+H]+	109.101082;307.128997;85.028231;191.080854;57.033208	level2	9.67034e+06
Foliamenthin	0.92039	C26H36O12	539.213	253.194	0.10606	neg	[M-H]-	539.214978;123.044401;165.127954;495.228348;183.140279	level3	9.66023e+06
7,8-dihydroxy-6-methoxychromen-2-one	1	C10H8O5	209.046	29.8747	9.69653	pos	[M+H]+	209.045331;228.998492;227.039097;107.084916;149.096251	level2	9.65842e+06
11(S),12(R)-Dihydrostemofoline	0.999862	C22H31NO5	390.223	109.091	10.8875	pos	[M+H]+	390.226762;372.210933;391.229448;189.127448;331.190819	level3	9.65357e+06
12,13-dihydroxyoctadec-9-enoic acid	0.935198	C18H34O4	313.238	441.255	0.74157	neg	[M-H]-	313.235083;183.139536;129.091563;295.227295;99.081444	level3	9.65095e+06
Osmaronin	0.829699	C11H17NO6	260.112	32.2504	1.45929	pos	[M+H]+	260.127348;242.10434;128.070946;214.129295;232.119125	level2	9.62217e+06
Blinin	0.969	C22H32O6	415.211	484.954	1.32146	pos	M+Na	119.085709;120.088888;415.201894;133.064948;91.054465	level1	9.60472e+06
poricoic acid DM	0.697039	C31H46O6	515.336	584.985	2.21564	pos	[M+H]+	437.306826;213.164961;419.289873;465.299187;259.170176	level3	9.59389e+06
subtrifloralactone D	0.738725	C27H36O6	455.241	541.842	0.038085	neg	[M-H]-	227.202533;455.247162;152.996081;375.074331;374.073722	level3	9.58543e+06
Glucokamalosid	0.962425	C37H58O14	725.377	728.793	1.6555	neg	[M-H]-	725.376078;225.008162;80.96548;116.929319;94.98047	level3	9.56294e+06
Beilschmieflavonoid B	0.93011	C35H36O9	599.23	485.462	1.07597	neg	[M-H]-	599.253351;100.933385;245.046044;66.581994;477.117007	level3	9.54122e+06
(2'R)-6-(2'-acetoxypentadecyl)-5-hydroxy-2-methoxy-1,4-benzoquinone	0.636903	C24H38O6	423.272	460.842	1.3951	pos	[M+H]+	423.328331;69.033372;277.218266;129.054399;81.069854	level3	9.53504e+06
(22R,23S)-17alpha,23-epoxy-22,29-dihydroxy-27-norlanost-8-en-3,24-dione	0.838915	C29H44O5	471.311	485.508	0.410294	neg	[M-H]-	471.30835;453.305493;425.309038;71.05042;73.029431	level3	9.53196e+06
Indole-3-carbinol	0.698679	C9H9NO	130.061	113.587	29.6237	pos	M+H-H2O	84.044026;130.065198;70.064941;103.053688;131.049974	level1	9.49592e+06
Ginsenoside C-K	0.943099	C36H62O8	621.436	854.137	0.36744	neg	M-H	621.439188;100.933622;339.324773;76.429803;72.332614	level1	9.48081e+06
apigenin 7-O-(6-O-p-coumaroyl)glucoside	0.929684	C30H26O11	561.142	45.1617	5.0253	neg	[M-H]-	145.014644;127.003307;561.188094;163.039256;83.013945	level3	9.43695e+06
shanzhiside methyl ester	0.838476	C18H28O10	403.161	124.73	0.550267	neg	[M-H]-	223.099339;59.013645;179.108308;403.163095;89.024226	level3	9.43232e+06
2alpha,3beta,23-trihydroxyolean-12-en-28-oic acid	0.699259	C29H46O5	475.34	496.67	1.46935	pos	[M+H]+	475.338281;457.332604;107.048718;191.144044;119.085287	level3	9.40961e+06
Cleroindicin D	0.743059	C8H12O4	171.068	842.151	2.22467	neg	[M-H]-	171.067202;144.057102;65.014564;129.045845;105.045964	level3	9.40375e+06
Pentose-Hexose + C10H17	0.916834	C21H36O10	447.223	210.911	0.884899	neg	[M-H]-	447.217252;71.013757;101.024879;315.18048;59.013725	level2	9.38976e+06
eupatorenone	0.916705	C15H22O2	235.169	367.078	1.01848	pos	[M+H]+	235.167521;175.146811;217.157676;133.101386;119.0857	level3	9.38948e+06
2,4-Nonadienal	0.968944	C9H14O	139.111	164.374	1.80169	pos	[M+H]+	139.110603;69.069972;121.101249;95.084914;81.069263	level2	9.38321e+06
D-Xylose	0.775412	C5H10O5	149.045	32.4891	2.49944	neg	[M-H]-	149.045351;89.024459;59.013828;71.013823;87.00881	level2	9.37804e+06
Matteuorienate B	0.733039	C29H34O13	589.193	240.434	2.86463	neg	[M-H]-	589.19167;116.927855;553.170655;100.933641;99.926333	level3	9.34841e+06
scortechinone N	0.726244	C34H42O10	609.267	362.571	0.381456	neg	[M-H]-	609.258265;152.996622;293.210996;241.013234;183.101597	level3	9.34453e+06
Chinensiolide C	0.872299	C15H18O4	263.127	223.967	0.959711	pos	[M+H]+	203.068594;245.116804;175.074731;263.126481;217.123549	level3	9.3367e+06
2-Aminobenzoic acid; CE0; RWZYAGGXGHYGMB-UHFFFAOYSA-N	0.974276	C7H7NO2	138.054	933.474	2.46972	pos	[M+H]+	120.044508;138.055159;114.971574;139.038292;111.04322	level2	9.33254e+06
Diacetoxy-4-gingerdiol	0.628925	C19H28O6	353.195	115.044	0.337403	pos	[M+H]+	353.15127;303.161281;163.039806;135.044492;195.063951	level3	9.25679e+06
esculentagenin	0.67683	C31H46O8	545.313	371.572	0.192176	neg	[M-H]-	469.296869;499.302233;545.306277;337.234333;145.028817	level3	9.24301e+06
L-cis-3-Amino-2-pyrrolidinecarboxylic acid	0.802673	C5H10N2O2	131.081	895.235	0.742215	pos	[M+H]+	44.049315;85.076263;131.081684;42.033702;98.046725	level3	9.23528e+06
N1,N10-Diferuloylspermidine	0.846812	C27H35N3O6	498.26	126.561	1.72422	pos	[M+H]+	498.26459;177.054246;234.110704;145.027685;322.211589	level2	9.22557e+06
Gentioflavine	0.782416	C10H11NO3	194.08	35.2119	2.28995	pos	[M+H]+	194.080146;99.043753;69.033463;96.043602;109.027522	level2	9.22102e+06
7-deacetylproceranone	0.60983	C26H34O4	409.235	709.197	1.15148	neg	[M-H]-	152.996324;78.959137;409.230866;255.233248;171.008153	level3	9.15811e+06
4'-hydroxycabenegrin A-I	0.812506	C22H22O6	383.149	220.923	1.36289	pos	[M+H]+	383.145001;351.124148;337.10691;368.128071;352.129479	level3	9.13968e+06
Kelampayoside A	0.7282	C21H32O12	475.181	91.4007	0.441349	neg	[M-H]-	163.061265;59.013641;101.024699;429.177173;205.073077	level3	9.133e+06
Panthenol	0.643928	C9H19NO4	206.14	822.561	2.44639	pos	[M+H]+	206.141824;189.11455;165.112916;112.086687;148.087083	level2	9.12865e+06
2-Hydroxytetracosanoic acid	0.973623	C24H48O3	383.352	859.625	0.000910315	neg	[M-H]-	383.351765;337.345908;335.33289;384.353754;365.346213	level3	9.0898e+06
4',5-di-O-acetylprunetin|5,4'-diacetoxy-7-methoxyisoflavone|5-Acetoxy-3-(4-acetoxy-phenyl)-7-methoxy-chromen-4-on|5-acetoxy-3-(4-acetoxy-phenyl)-7-methoxy-chromen-4-one|prunetin diacetate	0.737231	C20H16O7	369.093	46.3424	2.45225	pos	[M+H]+	285.157188;70.065021;369.198077;207.064279;190.123382	level3	9.07221e+06
Furyl hydroxymethyl ketone	0.912811	C6H6O3	127.039	916.223	2.89893	pos	[M+H]+	109.027583;127.039058;81.033403;43.017702;53.038343	level3	9.07035e+06
5-O-feruloyl-3-O-(beta-D-glucopyranosyl)-2-deoxy-D-ribono-gamma-lactone|[(2R,3S)-3-[(beta-D-glucopyranosyl)oxy]-1,2,3,4-tetrahydro-5-oxofuran-2-yl]methyl (E)-3-(4-hydroxy-3-methoxyphenyl)prop-2-enoate	0.770993	C21H26O12	469.134	129.965	0.399262	neg	[M-H]-	469.138282;152.011062;109.029633;153.019314;108.021455	level3	9.05951e+06
Grandidone C	0.648484	C40H50O8	657.349	322.82	0.526954	neg	[M-H]-	657.340924;152.01105;359.2795;109.029712;108.021504	level3	9.04898e+06
5-hydroxymethyl-9-methoxycanthin-6-one	0.681747	C16H14N2O3	283.107	252.348	0.180417	pos	[M+H]+	283.105495;265.094339;222.079197;185.069728;211.084839	level3	9.03202e+06
ent-dihydrotucumanoic acid	0.645409	C20H36O5	357.263	358.691	1.05082	pos	[M+H]+	95.085804;81.069894;137.059478;67.054272;357.257718	level3	9.02303e+06
L,L-Cyclo(leucylprolyl)	0.991907	C11H18N2O2	211.144	98.1242	2.18153	pos	[M+H]+	211.144027;86.096057;70.065103;212.109641;98.059644	level2	9.00525e+06
3-O-(2-O-sulfo-beta-D-quinovopyranosyl) quinovic acid 28-betaD-glucopyranosyl ester|3-O-(2-O-sulfo-beta-D-quinovopyranosyl)quinovic acid 28-beta-D-glucopyranosyl ester|3-O-<beta-D-2-O-sulphonylquinovopyranosyl>-quinovic acid-28-O-<beta-D-glucopyranosyl>ester|3-O-[beta-D-(2-O-sulphonyl)quinovopyranosyl]quinovic acid-28-O-beta-D-glucopyranosyl ester|zygophloside E|zygophyloside E	0.727749	C42H66O17S	873.388	479.753	0.754754	neg	[M-H]-	873.393875;559.182436;837.402538;101.02375;577.19027	level3	9.00466e+06
Auxin b	0.832127	C18H30O4	311.221	258.444	0.472853	pos	[M+H]+	275.201697;81.070081;93.069792;293.207972;71.048913	level2	8.99802e+06
Oleanane -4H, + 2O	0.866898	C30H48O2	441.372	642.471	1.37351	pos	[M+H]+	441.380278;423.362428;191.178912;95.084699;121.100787	level2	8.97707e+06
Tabernamine	0.949538	C40H48N4O2	615.368	657.314	1.63182	neg	[M-H]-	615.368927;145.029323;68.375432;571.379772;616.379166	level3	8.97225e+06
(Z)-1-(3,4-dihydroxyphenyl)docos-13-en-5-one	0.755682	C28H46O3	431.351	853.165	0.458558	pos	[M+H]+	431.354218;167.068998;57.069622;151.076071;71.085654	level3	8.9665e+06
(6E,8E)-4,6,8-Megastigmatriene	0.83884	C13H20	177.163	572.317	1.93388	pos	[M+H]+	177.164444;121.101326;107.084966;95.085018;69.070007	level2	8.93097e+06
(3S,7E,9R)-4,7-Megastigmadiene-3,9-diol 9-[apiosyl-(1->6)-glucoside]	0.662278	C24H40O11	503.249	306.001	0.762757	neg	[M-H]-	111.008851;503.248367;87.00884;173.009202;191.056802	level3	8.90121e+06
Uvaol	0.95059	C30H50O2	443.387	742.133	1.07626	pos	[M+H]+	191.178935;95.085835;109.101141;235.205859;217.195738	level2	8.88291e+06
1-(2,6-Dihydroxy-4-methoxyphenyl)-1-butanone	0.758895	C11H14O4	211.096	192.291	1.11849	pos	[M+H]+	167.070893;211.144379;57.033207;142.0609;70.065216	level3	8.87486e+06
Kaempferol-4'-methyl ether	0.694226	C16H12O6	301.07	174.262	1.52979	pos	[M+H]+	191.033711;301.070198;137.023435;259.060644;163.03796	level2	8.85037e+06
haloperidol	0.779643	C21H23ClFNO2	374.132	767.919	0.0768912	neg	[M-H]-	374.134318;338.157628;103.912706;99.926075;118.899177	level3	8.83734e+06
Bugbanoside C	0.68647	C37H56O12	691.37	394.788	1.50925	neg	[M-H]-	483.306662;691.181581;465.296998;645.370278;484.316447	level3	8.81871e+06
Adynerin	0.641664	C30H44O7	515.302	329.139	0.431258	neg	M-H	515.303335;351.235768;451.286174;453.296671;167.033783	level1	8.79097e+06
Scortechinone Q	0.819367	C34H42O8	577.286	233.587	0.346747	neg	[M-H]-	577.290864;531.240067;327.214139;71.013803;113.0237	level3	8.79094e+06
Benzoyl-dl-phenylalanine	0.964889	C16H15NO3	268.097	269.659	2.01152	neg	[M-H]-	268.096425;91.055669;224.106819;120.044946;132.045865	level3	8.78715e+06
16-hydroxy-9-oxooctadeca-10,12,14-trienoic acid	0.789659	C18H28O4	307.191	317.355	0.891827	neg	[M-H]-	289.17864;307.189349;135.082166;185.118865;171.101867	level3	8.7709e+06
Crassifoside E	0.601326	C25H26O11	501.141	192.167	1.38077	neg	[M-H]-	119.050418;163.039178;501.141092;175.039544;337.093286	level3	8.76608e+06
Darutoside	0.683589	C26H44O8	507.291	361.328	0.988894	pos	M+Na	507.289087;329.245368;508.289477;327.22577;107.048886	level1	8.72839e+06
(E)-1,5-bis(4'-beta-D-glucopyranosyloxy-3'-hydroxyphenyl)pent-4-en-1-yne|(E)-1,5-bis-(4'-beta-D-glucopyranosyloxy-3'-hydroxyphenyl)pent-1-en-4-yne|hypoxoside	0.860517	C29H34O14	605.181	552.098	1.49635	neg	[M-H]-	605.182077;78.959378;100.933683;152.996805;569.155519	level3	8.72768e+06
DTXSID20936418	1	C15H26N2O6	331.188	357.716	2.40345	pos	[M+H]+	331.190335;332.190387;145.100919;107.048849;95.085123	level3	8.72055e+06
10',11'-Dehydro-1'betaH-lycoserone	0.71853	C25H28O5	409.199	363.618	1.42133	pos	[M+H]+	107.048979;287.092079;181.048151;409.202184;139.037734	level3	8.71207e+06
Octahydrocurcumin	0.847466	C21H28O6	359.188	340.503	0.0298701	pos	M+H-H2O	359.188788;67.053886;81.069414;93.06993;277.213889	level1	8.71167e+06
Alpinoside	0.820414	C18H24O11	415.123	51.1611	1.29119	neg	[M-H]-	415.126013;87.008652;73.029285;101.024693;71.013661	level3	8.71043e+06
methyl ester of methylgrandifloroside	0.698628	C27H34O13	565.193	142.748	0.851013	neg	[M-H]-	403.139581;305.067933;565.182263;159.044099;519.283336	level3	8.6986e+06
11-(3-pentyloxiran-2-yl)undec-9-enoic acid	0.960701	C18H32O3	295.227	557.806	0.517351	neg	[M-H]-	295.227157;183.101165;277.215984;195.139504;134.893945	level3	8.69312e+06
2-Hydroxyacetophenone	0.984856	C8H8O2	137.059	39.9034	1.8184	pos	[M+H]+	137.0598;81.069274;122.035984;120.044507;109.064477	level2	8.68758e+06
Rubrofusarin gentiobioside	0.686325	C27H32O15	613.177	105.532	1.31007	neg	M-H+H2O	167.034072;289.072625;125.023945;613.178208;123.044493	level1	8.67404e+06
Halimedin	0.780884	C10H16N6O	235.134	359.806	0.112896	neg	[M-H]-	235.132154;65.039732;125.097472;97.066013;145.930758	level3	8.64402e+06
Ginsenosid C-K	0.728164	C36H62O8	621.436	869.349	0.393645	neg	[M-H]-	621.459539;100.933623;576.094189;513.510941;280.091072	level3	8.63212e+06
Citraconic anhydride	0.89842	C5H4O3	113.023	36.1183	0.267374	pos	[M+H]+	113.023004;43.017693;95.084948;57.033384;67.053835	level3	8.63067e+06
CHEMBL551502	0.79371	C21H20O6	367.119	371.882	1.96773	neg	[M-H]-	261.077114;367.120838;219.067646;217.050547;218.05932	level3	8.62969e+06
4-Chloro-3,5-dimethoxybenzyl alcohol	0.77825	C9H11ClO3	203.047	41.0397	0.0800501	pos	[M+H]+	157.041683;156.037799;203.047526;119.068309;120.076332	level2	8.61726e+06
methyl-(+)-(trans)-10-hydroxy-6,11-cyclofarnes-7(14)-oate	0.874652	C16H26O3	267.195	309.332	0.962977	pos	[M+H]+	249.186086;267.194627;121.101047;137.096009;231.174826	level3	8.60971e+06
(22R)-4beta-hydroxy-1-oxo-witha-2,5,16,24-tetraenolide|(4S,20S,22R)-4-hydroxy-1-oxo-witha-2,5,16,24-tetraenolide	0.73313	C28H36O4	435.252	716.46	1.84555	neg	[M-H]-	152.996524;435.248806;78.959341;96.96989;171.004462	level3	8.60398e+06
CHEMBL352400	0.715283	C12H17NO4	240.122	34.9317	0.429459	pos	[M+H]+	240.122298;167.068578;126.090353;241.152781;222.111071	level3	8.59813e+06
18beta-succinyloxy-ent-labdan-8beta-ol-15-oic acid	0.658534	C24H40O7	439.27	573.46	1.52489	neg	[M-H]-	277.215847;291.231776;71.013779;59.013745;319.228184	level3	8.58444e+06
Feruloylpodospermic acid B	0.945741	C35H36O15	695.199	184.095	1.33338	neg	[M-H]-	695.19019;134.037288;193.050202;229.014466;519.145888	level3	8.57268e+06
Handelin	0.758694	C32H40O8	611.284	412.548	2.01327	neg	M+CH3COO	611.285074;152.996678;78.95935;293.211304;273.075801	level1	8.57032e+06
CHEMBL1682933	0.98334	C13H12N2O	213.101	78.722	2.74453	pos	[M+H]+	195.090154;213.101963;196.094747;214.106077;167.069336	level3	8.56392e+06
3beta,15alpha-Diacetoxylanosta-8,24-dien-26-oic acid	0.807354	C34H52O6	557.386	800.708	1.19777	pos	[M+H]+	85.075569;361.191535;558.434044;473.32008;256.260828	level2	8.55641e+06
3beta,6beta-diacetoxy-19alpha-hydroxyurs-12-en-18-oic acid	0.626969	C34H52O7	573.38	800.714	0.211494	pos	[M+H]+	101.070283;573.48151;573.514478;73.028015;95.084962	level3	8.54647e+06
(10E,14Z)-9-Hydroxy-10,14-octadien-12-ynoic acid|(10E,14Z)-9-hydroxyoctadeca-10,14-dien-12-ynoic acid	0.918364	C18H28O3	291.196	484.601	0.118833	neg	[M-H]-	291.196063;165.127715;247.205527;273.18301;100.933424	level3	8.48719e+06
(6aS)-10t-Hydroxy-2.2.6ar.6bt.9.9.12at-heptamethyl-(8acH.12bcH)-Delta4a(14b).14-octadecahydro-picen|28-Nor-olean-12,17-dien-3beta-ol|28-nor-oleana-12,17-dien-3beta-ol|28-Nor-oleanadien-(12.17)-ol-(3beta)|28-Noroleana-12,17-dien-3beta-ol od. Aegiceradienol|aegiceradienol|Aegiceradienol, 'Genin A'	0.733423	C29H46O	411.361	724.131	0.249721	pos	[M+H]+	411.35723;95.085752;393.354896;189.164025;163.146789	level3	8.46699e+06
Leucosykol	0.694645	C20H22O5	343.153	570.426	0.327111	pos	[M+H]+	163.074727;105.033068;343.11449;95.049367;107.049012	level3	8.46177e+06
9-Oxononanoic acid	0.603637	C9H16O3	171.103	348.251	2.42286	neg	[M-H]-	171.102034;127.113284;136.861681;125.097574;83.050231	level3	8.42614e+06
(2S)-Pteroside K	0.911305	C21H29ClO7	429.165	82.8043	2.33667	pos	[M+H]+	429.158503;411.157588;393.140696;430.16476;349.119821	level3	8.4195e+06
capparisinine	0.796307	C27H33N3O6	494.232	196.828	0.862689	neg	[M-H]-	448.228614;71.013614;101.024685;316.182859;89.024245	level3	8.40186e+06
3,8a-Dihydroxy-5-isopropylidene-3,8-dimethyl-2,3,3a,4,5,8a-hexahydro-6(1H)-azulenone	0.884701	C15H22O3	233.153	267.717	0.46069	pos	[M-H2O+H]+	233.154567;175.110654;147.116739;191.141256;173.13329	level2	8.34424e+06
3-alpha-trans-sinapoyloxyjhanol 18-O-beta-D-glucopyranoside	0.753251	C37H54O12	689.352	589.757	1.9293	neg	[M-H]-	689.353348;397.135261;255.234132;653.375011;76.595292	level3	8.33316e+06
ulmoidol	0.818766	C29H42O5	471.309	459.384	2.26397	pos	[M+H]+	471.308937;219.138929;453.297565;147.080934;173.131403	level3	8.31052e+06
(3-hydroxy-5-oxo-4-phenyl-5H-furan-2-ylidene)-(2-methoxy-phenyl)-acetic acid methyl ester|leprapinic acid|Leprapinsaeure	0.878038	C20H16O6	353.101	288.475	0.844783	pos	[M+H]+	353.098832;107.049003;247.057765;229.047966;205.048453	level3	8.30694e+06
2-O-Methylpentofuranose #	0.653364	C6H12O5	163.062	799.251	1.09945	neg	[M-H]-	121.052062;162.839494;119.050473;82.041227;136.049938	level3	8.28834e+06
Aspidistrogenin A	0.811618	C27H44O10S	561.271	520.522	2.81227	pos	[M+H]+	561.260756;335.258898;261.222721;81.069474;155.009931	level3	8.26359e+06
(10E,14Z)-9-oxooctadeca-10,14-dien-12-ynoic acid	0.890996	C18H26O3	289.18	427.383	2.96642	neg	[M-H]-	289.17898;245.188914;109.065189;167.033799;145.064767	level3	8.21597e+06
3'-O-Sinapoyl Sweroside	0.737099	C27H32O13	563.175	225.435	2.99802	neg	[M-H]-	273.075757;167.034017;563.172255;125.02376;123.044231	level3	8.21222e+06
eujavanicol A	0.618869	C19H32O4	325.236	485.515	0.1243	pos	[M+H]+	233.188729;93.06972;325.24163;135.115801;81.070019	level3	8.20526e+06
2-hydroxyhexadecanoic acid	0.973353	C16H32O3	271.228	524.911	0.618001	neg	[M-H]-	271.226734;226.956487;225.222421;183.89803;253.214227	level2	8.19042e+06
(2S)-1-[2,6-dimethoxy-4-(prop-2-enyl)phenoxy]-3-methylbutane-2,3-diol|lenisin A	0.739242	C16H24O5	297.169	107.624	1.45917	pos	[M+H]+	297.170409;135.116408;93.069874;121.101325;107.08498	level3	8.16485e+06
5alpha-Hydroxyplucheinol	0.816194	C15H24O5	285.169	604.615	1.08614	pos	[M+H]+	171.012314;153.001884;237.096971;303.181588;155.018383	level3	8.15856e+06
3-epi-GA1-3-O-beta-D-glucopyranosid|3-epiGA1-3-O-glucoside	0.652186	C25H34O11	509.201	335.93	1.94048	neg	[M-H]-	509.272345;301.140601;312.22611;311.222052;190.948709	level3	8.14068e+06
(1S,2R,4R,8S)-p-Menthane-2,8,9-triol 2-glucoside	0.906099	C16H30O8	349.186	279.378	0.449569	neg	[M-H]-	349.189672;187.133605;59.013855;141.128928;89.024591	level3	8.13753e+06
Okaramine M	0.620046	C29H30N4O3	481.226	257.197	5.95281	neg	[M-H]-	89.024327;59.013659;481.221818;131.035533;435.227203	level3	8.12949e+06
Picropodophyllin	0.702847	C22H22O8	397.127	419.128	0.952206	pos	M+H-H2O	107.049037;397.127101;291.086029;273.077397;231.066319	level1	8.12614e+06
Cyllenin A	0.988677	C20H30O5	349.202	398.827	1.49712	neg	[M-H]-	349.205747;305.214727;125.873698;302.911443;350.202567	level3	8.12149e+06
15,17-dihydroxy-7beta-succinyloxy-ent-cleroda-3,13E-diene	1	C24H38O6	423.272	538.707	0.740778	pos	[M+H]+	423.288859;424.267061;95.08607;121.101256;81.070163	level3	8.0878e+06
3alpha,6alpha-dihydroxymegastigman-7-en-9-one 3-O-D-apiofuranosyl-(1->6)-beta-D-glucopyranoside|3alpha,6alpha-dihydroxymegastigman-7-en-9-one-3-O-beta-D-apiofuranosyl-(1->6)-beta-D-glucopyranoside	0.832268	C24H40O12	519.246	253.194	3.00059	neg	[M-H]-	163.061356;101.024654;59.013582;473.236886;205.073297	level3	8.07127e+06
methyl 3-(4-hydroxyphenyl)-3-oxopropanoate	0.920975	C10H10O4	195.069	35.2164	19.7493	pos	[M+H]+	195.08979;177.054036;145.027412;138.066638;107.048692	level3	8.06922e+06
Kotomolide B	0.600969	C25H44O3	393.335	825.056	0.372653	pos	[M+H]+	127.039061;393.336153;57.069598;109.027591;71.085634	level3	8.01355e+06
Soyacerebroside I	0.863313	C40H75NO9	712.534	835.715	2.16792	neg	[M-H]-	712.535692;712.490038;89.024361;532.468311;101.024714	level3	8.00075e+06
6-Hydroxynobiline	0.633433	C17H27NO4	308.186	305.063	1.53886	neg	[M-H]-	116.072046;308.186618;114.092604;158.082693;210.120988	level3	7.99415e+06
Clinacoside B	0.692422	C10H18O7S	281.07	44.8259	0.936079	neg	[M-H]-	96.959514;281.072316;163.038913;219.070837;59.013846	level3	7.97851e+06
Sedanolide	0.808351	C12H18O2	217.119	873.46	0.310384	pos	M+Na	217.119467;175.096475;218.140924;176.09251;177.097853	level1	7.97665e+06
Cochinolide beta-glucopyranoside	0.697216	C21H24O9	419.134	132.226	0.0116126	neg	[M-H]-	213.090824;257.083266;107.05002;106.042886;419.129339	level3	7.96869e+06
gamma-elemene	0.854338	C14H22	191.179	737.073	1.21534	pos	[M+H]+	191.179541;121.101337;93.069908;135.116526;107.085003	level3	7.96123e+06
Methyl-imbricatoloat	0.6634	C21H36O3	337.273	544.893	0.243415	pos	[M+H]+	337.270092;81.069269;67.053813;95.084957;69.069969	level3	7.96059e+06
Cascaroside C	0.846263	C27H32O13	563.175	170.47	3.00906	neg	[M-H]-	563.171832;309.078246;294.055694;268.074805;283.096702	level3	7.95985e+06
8-Angeloyloxy-14-thapsanol	0.950442	C20H32O4	337.236	359.017	0.17123	pos	[M+H]+	337.240177;97.100694;55.054146;319.226138;143.105671	level3	7.94115e+06
(1alpha,6alpha,14alpha)-8-acetoxy-1,6,16-trimethoxy-4-(methoxymethyl)aconitan-14-yl 4-methoxybenzoate|macrorhynine A	0.637433	C33H43NO9	596.28	512.784	2.34046	neg	[M-H]-	596.275859;278.222408;152.996555;78.959408;243.015686	level3	7.93568e+06
4-[2-(methoxycarbonyl)anilino]-4-oxobutanoic acid	0.665393	C12H13NO5	250.072	64.1166	0.818147	neg	[M-H]-	206.081565;250.071126;98.060993;67.018556;79.018433	level3	7.92771e+06
pierisformoside H	0.725418	C26H42O10	515.281	292.311	0.0587245	pos	[M+H]+	515.281252;516.279884;57.254772;353.226982;177.053208	level3	7.91322e+06
SCHEMBL8679699	0.996167	C16H22N4O2	301.166	604.629	0.229288	neg	[M-H]-	301.166391;217.073239;285.132055;161.063036;302.166017	level3	7.90144e+06
Oliveridine[Gentiana]	0.888788	C10H13NO2	180.101	35.5092	0.918897	pos	[M+H]+	180.101551;95.04846;152.10637;67.053925;120.044815	level3	7.84106e+06
kaempferol 3-O-glucosylrhamnoside 7-O-rhamnoside	0.858045	C33H40O19	739.205	152.976	3.9372	neg	[M-H]-	175.039328;693.191914;160.01545;193.04965;517.161615	level3	7.83552e+06
methyl 3-(4-hydroxy-3-methoxyphenyl)propanoate	0.857985	C11H14O4	211.096	155.524	1.02802	pos	[M+H]+	179.070127;211.095847;193.08424;123.043687;151.075679	level3	7.83363e+06
6-Epi-7-isocucurbic acid glucoside	0.750365	C18H30O8	373.187	167.171	2.49713	neg	[M-H]-	59.013844;89.024619;373.18104;71.013897;101.023929	level3	7.81359e+06
Isosinensetin	0.988811	C20H20O7	373.128	301.852	2.10783	pos	M+H	373.128674;343.082983;358.10436;357.097834;374.134138	level1	7.79896e+06
Ac-DL-Trp-OH	0.96991	C13H14N2O3	245.093	111.849	0.111116	neg	M-H	245.091846;203.082056;74.024423;116.036032;58.029927	level1	7.79133e+06
DG(18:3n3/0:0/18:3n3)	0.997593	C39H64O5	613.483	826.369	2.7799	pos	[M+H]+	613.479415;613.515893;81.070068;95.084864;67.05438	level3	7.78562e+06
Senkyunolide A	0.999996	C12H16O2	193.122	529.464	0.879708	pos	[M+H]+	193.123079;123.043847;194.11745;81.033413;95.084925	level2	7.76495e+06
Tetrachyrin	0.756793	C20H28O2	301.215	262.188	0.468829	pos	[M+H]+	301.214168;286.044615;255.211061;133.101594;173.130859	level3	7.73642e+06
Clusiaphenone B	0.904547	C23H26O4	367.188	280.631	1.36686	pos	[M+H]+	367.187896;220.086872;349.173371;305.148562;368.186916	level3	7.72162e+06
(E)-3-(5-acetoxy-3-methylpent-2-enamido)propanoic acid|pestalotiopamide E	0.728746	C11H17NO5	244.117	35.5774	0.165343	pos	[M+H]+	244.119665;198.111116;226.105658;143.056955;180.101644	level3	7.7152e+06
11-hydroxyusambarine|16-(2-methyl-2,3,4,9-tetrahydro-1H-beta-carbolin-1-yl)-17-nor-coryn-18-en-12-ol|Usambaridin Vi	0.837388	C30H34N4O	465.27	174.18	0.584016	neg	[M-H]-	465.272205;59.013737;101.024947;71.013849;113.024873	level3	7.70175e+06
(8E,12Z)-10,11-dihydroxyoctadeca-8,12-dienoic acid	0.908334	C18H32O4	311.222	378.94	0.267636	neg	[M-H]-	311.222095;293.21031;171.102077;139.112385;225.149082	level3	7.69555e+06
Androstenedione	0.83543	C19H26O2	287.2	376.628	1.25724	pos	[M+H]+	287.197297;181.048125;107.048978;213.161375;175.146715	level2	7.68167e+06
Gloiosiphone B	0.835195	C6H10O4	145.051	33.5003	4.17034	neg	[M-H]-	145.051093;59.013837;83.050272;101.061567;126.96555	level3	7.68097e+06
Eicosapentaenoic acid	0.987275	C20H30O2	303.231	258.214	1.4897	pos	[M+H]+	303.232151;123.116783;163.111618;109.101137;285.218568	level2	7.67272e+06
Methylnissolin	0.919437	C17H16O5	301.106	144.299	0.348694	pos	M+H	301.107538;269.080407;241.084829;245.042053;181.06547	level1	7.61346e+06
Bisandrographolide A	0.757897	C40H56O8	663.39	567.235	1.46133	neg	[M-H]-	663.391032;175.039669;160.016098;73.71057;645.371437	level3	7.6024e+06
L-Asarinin	0.841235	C20H18O6	355.117	307.428	0.419215	pos	[M+H]+	355.119291;337.105184;277.08334;281.116003;322.087269	level2	7.57275e+06
(12RS)-(8E,10E)-12-hydroxy-7-oxo-8,10-octadecadienoic acid	0.88225	C18H30O4	309.207	474.808	0.263257	neg	[M-H]-	309.208831;291.196258;195.139751;247.205611;199.849568	level3	7.56096e+06
(2E,11Z)-4-oxooctadeca-2,11-dienoic acid	0.874879	C18H30O3	293.212	430.835	1.32108	neg	[M-H]-	293.210372;113.097245;249.186127;221.15271;134.894271	level3	7.541e+06
BCA 1	0.854519	C21H34O5	367.247	506.392	1.27099	pos	[M+H]+	275.201157;349.235372;93.069564;79.053797;107.084574	level3	7.53474e+06
oleiferin E	0.854887	C20H20O5	341.138	313.618	0.822301	pos	[M+H]+	187.074046;341.139998;167.071006;309.115262;137.059495	level3	7.5065e+06
Haedoxan	0.793176	C33H34O14	653.188	259.987	1.55203	neg	[M-H]-	653.194581;345.099017;197.044567;137.02489;125.023537	level3	7.4923e+06
[(9R,10R)-10-acetyloxy-8,8-dimethyl-2-oxo-9,10-dihydropyrano[2,3-f]chromen-9-yl] 2-methylbutanoate	0.742223	C21H24O7	389.159	189.335	0.793028	pos	[M+H]+	245.115655;227.108208;199.111404;215.105574;135.080254	level2	7.49163e+06
Avocadyne Acetate	0.893134	C19H34O4	327.252	297.311	0.84333	pos	[M+H]+	327.254024;81.070088;69.069946;95.084906;55.054141	level2	7.49053e+06
Buddlenol F	0.662227	C32H38O12	615.243	245.225	0.804622	pos	[M+H]+	389.155149;181.050438;329.137436;371.147224;209.081307	level3	7.4854e+06
Tentoxin	0.786934	C22H30N4O4	415.231	323.294	0.0109823	pos	[M+H]+	415.22941;125.095259;97.100472;189.11107;55.054092	level3	7.47664e+06
6-Acetoxy-5-hexadecanolide	0.930168	C18H32O4	311.222	345.443	0.243248	neg	[M-H]-	311.221997;293.210068;237.1879;183.139398;211.132628	level3	7.46789e+06
Pacifidine	0.801709	C30H40N2O8	555.274	199.615	13.4831	neg	[M-H]-	509.263826;555.252486;101.024581;347.203024;71.013752	level3	7.45608e+06
3-[(3S,5R,10S,13R,14S,17S)-3-[(2R,3S,4R,5S,6S)-3,5-dihydroxy-4-methoxy-6-methyloxan-2-yl]oxy-14-hydroxy-10,13-dimethyl-1,2,3,4,5,6,7,8,9,11,12,15,16,17-tetradecahydrocyclopenta[a]phenanthren-17-yl]-2H-furan-5-one	0.789675	C30H46O8	535.322	448.842	2.42398	pos	[M+H]+	535.319871;184.073785;104.106678;89.059593;86.096286	level2	7.44938e+06
1,4,7-Tridecatriene	0.614455	C13H22	179.179	677.506	1.83418	pos	[M+H]+	81.06927;95.084974;179.032974;67.053814;109.101292	level3	7.44357e+06
threo-2'',3''-dihydroxyechiumine	0.767835	C20H33NO8	416.227	66.1868	1.12287	pos	[M+H]+	416.226487;216.123613;123.117176;202.105643;159.065939	level3	7.4338e+06
(R)-(E)-8-Hydroxy-11,17-octadecadien-9-ynoic acid|8-Hydroxy-octadecadien-(trans-11,17)-in-(9)-saeure|8-hydroxy-trans-11,17-octadecadien-9-ynoic acid	0.874864	C18H28O3	291.196	561.237	0.424973	neg	[M-H]-	291.196092;247.205635;100.933504;153.128195;127.112933	level3	7.41738e+06
Nepodin	0.813463	C13H12O3	217.085	220.748	1.80081	pos	[M+H]+	217.084642;156.056432;202.061085;184.052717;128.062295	level2	7.39761e+06
delta-tocotrienol	0.95388	C27H40O3	413.303	429.479	1.86927	pos	[M+H]+	413.306459;213.161485;395.289491;157.100579;414.306043	level3	7.38527e+06
Euphornin E	0.731541	C33H42O8	567.292	445.959	3.14853	pos	[M+H]+	107.048728;401.232218;303.155354;139.039433;567.299583	level3	7.37346e+06
Biorobin	0.988137	C27H30O15	593.151	104.822	0.787121	neg	[M-H]-	593.158918;285.038867;284.030838;255.027339;227.033936	level2	7.36748e+06
alpha-Tocotrienol	0.933646	C29H44O2	423.326	790.527	0.0247532	neg	[M-H]-	423.326448;205.158096;424.33061;255.233094;206.163345	level3	7.32132e+06
Quinolactacin A	0.855002	C16H18N2O2	269.13	432.933	1.92491	neg	[M-H]-	62.964159;269.131961;181.900109;141.868423;225.76293	level3	7.31564e+06
porrigenic acid	0.943184	C18H30O4	309.207	508.079	0.357263	neg	[M-H]-	309.208901;291.196469;247.205687;265.216582;171.101985	level3	7.31505e+06
Nerolidyl acetate	0.841049	C17H28O2	265.216	429.332	2.42311	pos	[M+H]+	265.213709;95.084899;81.070057;109.101251;67.054409	level2	7.30998e+06
3-HYDROXYDODECANEDIOIC ACID	0.727631	C12H22O5	247.149	156.593	17.8731	pos	[M+H]+	229.101871;147.116311;144.079896;133.064841;201.102885	level3	7.30279e+06
2-Hydroxybenzaldehyde	1	C7H6O2	121.029	919.534	2.67283	neg	[M-H]-	121.029857;122.023574;120.021448;92.027112;93.034483	level2	7.30138e+06
16-(4,9-dihydro-3H-beta-carbolin-1-yl)-17-nor-coryn-19-ene|3,4-Dihydro-usambarensin	0.970578	C29H30N4	433.235	618.276	2.83832	neg	[M-H]-	152.996298;78.959001;434.2392;153.998553;96.969885	level3	7.2834e+06
9,10,11-Trihydroxy-12-octadecenoic acid	0.947667	C18H34O5	329.233	275.776	1.87703	neg	[M-H]-	329.232999;201.113426;311.223242;171.101884;127.11303	level3	7.27892e+06
pseudocordatolide C	0.8041	C20H22O5	343.153	322.601	5.05951	pos	[M+H]+	325.145957;343.105397;307.136185;305.12327;282.090703	level3	7.27368e+06
Acetylpanaxydol	0.896422	C19H26O3	303.195	460.126	0.127463	pos	[M+H]+	243.174535;303.194135;173.09437;147.079983;133.101014	level2	7.27258e+06
Quercetin-3-(6''-malonyl)-Glucoside	0.931225	C4H9NO2	549.089	99.636	1.39652	neg		549.162822;300.027897;505.09395;387.109191;301.034514	level2	7.26555e+06
2-(2-Hydroxypropyl)-6-methylpiperidine	0.610104	C9H19NO	158.153	331.446	1.96924	pos	[M+H]+	158.152978;114.971617;102.091346;55.934365;57.069582	level3	7.26403e+06
(Z)-4-(docos-13-enoyloxy)benzoic acid	0.99942	C29H46O4	457.332	492.9	0.153066	neg	[M-H]-	457.329339;50.815068;293.210274;458.340396;413.335209	level3	7.25343e+06
(4E)-6,7,9-trihydroxydec-4-enoic acid	0.627385	C10H18O5	217.108	108.478	1.4478	neg	[M-H]-	217.107689;171.102025;155.107879;199.098782;137.09654	level3	7.25273e+06
(+)-syringaresinol 4-O-beta-D-glucopyranosyl(1->6)-beta-D-glucopyranoside	0.859879	C34H46O18	741.26	173.547	1.41498	neg	[M-H]-	741.271212;167.033864;152.011135;125.023822;561.199555	level3	7.23644e+06
3-acetylleptophyllin A	1	C20H39NO4	358.295	466.89	2.1779	pos	[M+H]+	358.242988;359.11597;340.286063;107.178066;184.295814	level3	7.20719e+06
CHEMBL521876	0.644313	C15H12O8	319.045	61.4194	2.22311	neg	[M-H]-	183.029964;139.039564;153.019279;97.02953;165.018314	level3	7.19848e+06
Dihydromethysticin	0.971116	C15H16O5	259.096	368.725	0.76862	pos	M+H-H2O	259.095473;161.05945;231.100184;171.07928;216.078849	level1	7.18848e+06
1-(2,6-Dihydroxyphenyl)-4-methyl-4-tridecen-1-one	0.881902	C20H30O3	319.226	350.759	1.28463	pos	[M+H]+	181.120846;319.226391;57.069934;209.154485;85.064888	level3	7.17819e+06
Phthalic acid, butyl 2-ethylbutyl ester	0.914534	C18H26O4	305.175	417.409	1.63173	neg	[M-H]-	305.176529;203.144548;179.142871;57.034337;127.87004	level3	7.15787e+06
xi-Tetrahydro-3-propyl-2H-pyran-2-one	0.834632	C8H14O2	143.106	352.022	2.49625	pos	[M+H]+	143.03379;71.048964;98.059834;43.017669;125.095519	level2	7.14216e+06
Bacobitacin B	0.831272	C34H46O9	597.294	565.839	16.7772	neg	[M-H]-	152.996295;597.308163;279.232422;78.959123;317.062155	level3	7.1237e+06
2??-Acetoxy-4??-hydroxy-6??-p-hydroxybenzoyloxy-10??-benzoyloxy-dauc-8-ene	0.89531	C32H38O7	535.27	766.7	2.37474	pos	[M+H]+	535.275128;536.27253;435.251767;507.276724;447.21695	level3	7.11071e+06
DTXSID40781124	0.794202	C12H14O6	253.071	48.2944	2.25849	neg	[M-H]-	253.069196;161.024113;135.044791;179.034104;134.03711	level3	7.08693e+06
15-oxolabda-8(17),11(Z),13(Z)-trien-19-oic acid	0.926046	C20H28O3	317.211	363.534	1.76183	pos	[M+H]+	317.209572;271.20567;299.204133;233.043697;149.096244	level3	7.06673e+06
1-hydroxycollybolide	0.909179	C22H20O8	413.122	237.483	0.5126	pos	[M+H]+	163.038944;413.115046;177.055388;145.028571;121.028544	level3	7.06017e+06
dihydrocinnamyl alcohol 9-O-(6'-O-alpha-L-arabinofuranosyl)-beta-D-glucopyranoside|junipercomnoside F	0.806433	C20H30O10	429.177	120.474	2.61777	neg	[M-H]-	429.177472;59.013598;101.02449;297.134557;71.013557	level3	7.03759e+06
afzelechin-(4alpha->8)-catechin-3-O-alpha-rhamnopyranoside	0.715525	C36H36O15	707.199	324.974	1.25746	neg	[M-H]-	707.20142;96.960557;125.023608;545.149269;167.033868	level3	7.02493e+06
Apigenin-8-C-glucoside-2'-rhamnoside	0.722906	C27H30O14	577.157	73.7041	1.64213	neg	[M-H]-	577.157072;293.047346;413.083026;125.024515;337.070646	level2	7.02417e+06
8-Methyl-1'-oxonorpodopyrone	0.974964	C19H30O4	321.21	853.779	1.26142	neg	[M-H]-	321.209076;96.959428;106.041506;100.933667;160.842929	level3	7.01878e+06
Shizukaol J	0.977037	C32H36O8	549.248	686.266	0.554848	pos	[M+H]+	549.247953;521.257216;421.235389;550.253679;433.196312	level3	7.00484e+06
(2E)-6-butoxy-2-hydroxymethyl-6-methyl-2,7-octadienoic acid	0.932554	C14H24O4	255.16	382.922	1.29316	neg	[M-H]-	211.170139;255.16006;193.159387;237.14922;212.174571	level3	6.97613e+06
7-hydroxy-4',8-dimethoxyisoflavone 7-O-beta-D-apiofuranosyl-(1->6)-beta-D-glucopyranoside	0.657015	C28H32O14	593.186	129.342	2.18959	pos	[M+H]+	107.048662;181.05047;245.042027;275.091788;139.039286	level3	6.96647e+06
Homogentisic acid	1	C8H8O4	169.049	929.187	0.637727	pos	[M+H]+	148.975606;171.148771;147.968091;46.064903;130.967379	level2	6.9622e+06
Marine-derived tocopherol	0.996175	C29H48O2	429.371	820.791	0.0509722	pos	[M+H]+	429.371881;81.070048;95.085054;411.356826;430.378588	level3	6.95626e+06
Scortechinone W	0.686372	C34H38O10	605.239	667.856	1.12489	neg	[M-H]-	529.225916;514.196417;473.201633;486.20676;485.190094	level3	6.92e+06
3,3',4,4'-Tetrahydroxy-5,5'-diisopropyl-2,2'-dimethylbiphenyl	0.999904	C20H26O4	331.188	370.218	1.97393	pos	[M+H]+	331.190321;313.173271;332.190809;256.191611;145.100511	level3	6.91707e+06
4-O-T-Cadinylangolensin	0.694341	C31H40O4	475.29	377.708	0.297892	neg	[M-H]-	475.296511;313.236041;59.013653;183.140057;101.023727	level3	6.91689e+06
1,8-di-O-(3-methoxy-4-hydroxybenzoyl)-3,6-dihydroxycyclooctane-2,7-endoperoxide	0.858303	C24H26O12	505.134	205.228	1.3489	neg	[M-H]-	167.033982;505.25997;123.044283;327.214132;125.023812	level3	6.90804e+06
2'-trans-p-coumaroyl-dihydropenstemide	0.949947	C30H40O12	591.248	398.839	0.395979	neg	[M-H]-	591.240116;80.964807;225.00799;164.985554;65.695017	level3	6.89739e+06
Indole-3-carboxylic acid	0.948869	C9H7NO2	160.04	23.6882	1.67435	neg	[M-H]-	116.051043;160.040414;100.016186;87.008852;40.019285	level3	6.89642e+06
camphoratin J|methyl 3,11-dioxo-4alpha-methyl-14beta-ergosta-8,24(28)-dien-26-oate	0.923356	C29H44O3	439.321	482.607	0.515782	neg	[M-H]-	439.320841;71.050527;409.310312;421.315939;353.250515	level3	6.88987e+06
tamanolide P	0.875722	C23H28O5	383.189	798.694	0.909755	neg	[M-H]-	383.190181;116.927944;100.933732;84.938695;99.92517	level3	6.8876e+06
(1alpha,4alpha,8beta)-1,4-Dihydroxy-2,11(13)-eudesmadien-12,8-olide|1alpha,4alpha-dihydroxy-2,3-dehydro-5,6-dihydroalantolactone	0.933469	C15H20O4	265.143	204.218	0.21401	pos	[M+H]+	247.131915;265.099617;163.074636;135.080255;229.121688	level3	6.87269e+06
Epimedoside C	0.714772	C26H28O11	517.17	246.721	1.55458	pos	[M+H]+	337.10553;517.167789;137.059549;305.077533;201.054215	level2	6.8705e+06
4'''-Hydroxytrianguletin	0.780582	C34H30O11	613.17	384.583	1.41055	neg	[M-H]-	285.073801;179.033931;327.085631;613.175508;569.100473	level3	6.86979e+06
Ixerinoside	0.747253	C21H28O9	425.177	180.842	6.55055	pos	[M+H]+	245.114653;215.105776;227.104728;70.065055;425.117996	level3	6.82242e+06
7-acetylneotrichilenone	0.815149	C28H40O3	425.306	480.55	4.98469	pos	[M+H]+	425.342578;353.248771;107.084534;285.185785;95.085766	level3	6.81123e+06
Daurisoline	0.65158	C37H42N2O6	669.313	321.715	3.48068	neg	M+CH3COO	669.315563;168.007437;125.023907;149.99586;507.228506	level1	6.81024e+06
CHEMBL3818374	0.950913	C42H52O9	701.368	556.382	2.15525	pos	[M+H]+	701.364692;539.310743;702.369213;77.932243;540.320544	level3	6.79196e+06
3beta-angeloyloxy-8-oxo-eremophil-6(7)-en-12-oic acid|eremofarfuginoic acid	0.980231	C20H28O5	349.198	368.398	0.677864	pos	[M+H]+	349.196946;275.197942;257.189925;81.069455;159.117381	level3	6.78277e+06
MCULE-3426192388	0.667059	C28H42O5	457.297	482.045	1.70581	neg	[M-H]-	457.294098;439.288856;293.211414;421.276046;287.166065	level3	6.77625e+06
Annomuricatin B	0.882631	C35H49N9O9	738.356	511.974	2.07219	neg	[M-H]-	738.182113;116.929374;125.02547;167.036567;739.314782	level3	6.75816e+06
5alpha-Methoxy-5,10-dihydroprintziasaeure-methylester	0.999651	C22H32O4	361.233	583.655	1.97912	pos	[M+H]+	361.232163;362.239454;249.107275;185.082088;233.775569	level3	6.74278e+06
7-Ethoxy-5-hydroxy-p-mentha-1(6)-ene-2-one	0.984254	C12H20O3	211.134	391.366	0.873067	neg	[M-H]-	211.133155;167.14503;125.097527;67.019106;212.138258	level3	6.74096e+06
cistanoside F	0.61294	C21H28O13	487.145	42.6893	0.315425	neg	[M-H]-	145.02932;163.039239;119.050438;487.142212;113.02369	level3	6.73165e+06
Nicotyrine	0.889722	C10H10N2	159.091	110.559	1.85492	pos	[M+H]+	159.0928;132.080566;114.971646;55.934177;130.065221	level3	6.69804e+06
Atractyloside A 14-O-beta-D-fructofuranoside	0.783798	C27H46O15	609.284	319.476	12.8383	neg	[M-H]-	179.056637;89.024338;101.024692;609.258559;71.01361	level3	6.69184e+06
Caudatin	0.680667	C28H42O7	491.296	444.561	0.35338	pos	[M+H]+	184.073267;491.290875;104.106389;147.043446;86.096046	level2	6.69094e+06
Licofuranone	0.927614	C20H20O6	357.132	153.261	0.404053	pos	[M+H]+	137.059746;357.130352;107.048963;327.125161;151.037734	level3	6.64303e+06
Capsaicin	0.959061	C18H27NO3	306.205	427.9	0.574588	pos	[M+H]+	137.059822;306.207689;182.152549;170.153618;153.126629	level2	6.63957e+06
Butyl (S)-3-hydroxybutyrate glucoside	0.895892	C14H26O8	321.155	161.118	0.351369	neg	[M-H]-	321.153674;159.103185;59.01357;89.02419;71.013489	level3	6.60476e+06
Formononetine	0.978558	C16H12O4	269.081	299.905	2.30084	pos	[M+H]+	269.081178;81.069271;67.053787;254.054678;93.069826	level2	6.59814e+06
2,5-Dihydro-2,4-dimethyloxazole	0.846998	C5H9NO	100.075	735.413	2.96868	pos	[M+H]+	100.07509;59.060151;101.070129;57.069573;42.03384	level2	6.59226e+06
[1R,(?)]-6alpha-Acetyloxy-1,2,3,4,4aalpha,5,6,8aalpha-octahydro-4alpha-hydroxy-4,7-dimethyl-alpha-methylene-1alpha-naphthaleneacetic acid methyl ester	0.958532	C18H26O5	323.185	382.262	2.28509	pos	[M+H]+	305.174559;113.059041;323.18546;95.049341;81.069237	level3	6.57747e+06
3,15-dihydroxy-18-norabieta-3,8,11,13-tetraene	0.785766	C19H26O3	303.195	491.06	0.0647175	pos	[M+H]+	285.185992;191.105833;267.172836;215.10546;303.194074	level3	6.57623e+06
Shikonofuran E	0.755702	C21H24O5	357.172	310.912	0.841444	pos	[M+H]+	357.171338;275.200363;95.085758;67.054298;109.100929	level3	6.57236e+06
Palmitic amide	0.698846	C16H33NO	256.263	389.116	1.61097	pos	[M+H]+	256.2609;88.07524;102.0914;70.065215;57.069654	level2	6.56322e+06
10'-Hydroxyusambarensine	0.747549	C29H28N4O	447.214	460.94	1.26648	neg	[M-H]-	152.996339;78.959169;447.21703;71.082082;293.17422	level3	6.55591e+06
N,N-caffeoyl,Feruloyl-spermidine derivative	0.902673	C26H33N3O6	484.24	64.9218	6.27417	pos	[M+H]+	484.243119;177.053743;220.094468;234.109994;163.037374	level3	6.5537e+06
Picrasinoside C	0.834172	C28H42O11	553.267	553.402	2.43766	neg	[M-H]-	553.263225;80.964795;225.008943;94.980464;164.98531	level3	6.53255e+06
9H-pyrido[3,4-b]indol-1-ylmethanol	0.959378	C12H10N2O	199.086	61.5271	0.00610222	pos	[M+H]+	199.084975;181.074465;154.0406;182.0785;140.046823	level3	6.51743e+06
(2beta,3beta,5beta,22R)-2,3,5,14,20,22,25,26-octahydroxycholest-7-en-6-one|26-hydroxypolipodine B|26-hydroxypolypodin B|26-hydroxypolypodine B|5,20,26-trihydroxyecdysone	0.787759	C27H44O9	511.29	412.32	2.10463	neg	[M-H]-	511.269906;59.013584;465.285273;89.024566;467.278576	level3	6.51401e+06
8-methoxy-1-methylquinolin-4(1H)-one	0.981592	C11H11NO2	190.086	75.6965	0.829862	pos	[M+H]+	190.086274;162.090247;208.066957;108.043916;191.068405	level3	6.5015e+06
(18R)-18-O-beta-D-glucopyranoside of murolic acid|murolic acid (18R)-18-O-beta-D-glucopyranoside	0.676563	C27H46O10	529.305	673.182	0.203807	neg	[M-H]-	529.299227;96.959563;58.812423;122.975724;79.957183	level3	6.48804e+06
3-hydroxydocosanoic acid	0.956996	C22H44O3	355.321	826.489	0.714095	neg	[M-H]-	355.323365;309.313388;307.299185;356.32258;337.30859	level3	6.46087e+06
4-(4-Methylphenyl)pentanal	0.789419	C12H16O	177.127	347.34	1.64094	pos	[M+H]+	177.127634;145.027603;159.117047;93.069828;117.033507	level3	6.45957e+06
ochroleucin A1	1	C23H14O6	387.085	372.273	1.19278	pos	[M+H]+	387.081939;388.088924;107.049205;369.078471;341.078603	level3	6.41622e+06
Rosavin	0.977387	C20H28O10	427.159	108.916	1.22351	neg	[M-H]-	89.024456;59.013705;71.01372;149.045648;101.024855	level2	6.41606e+06
4'-Demethylpodophyllotoxin	0.798851	C21H20O8	383.112	220.892	0.565068	pos	M+H-H2O	147.043919;163.037656;383.108741;119.048278;145.027472	level1	6.38779e+06
Isoglabrolide	0.999533	C30H44O4	467.317	672.833	0.459601	neg	[M-H]-	467.314896;51.924621;421.309381;468.321784;305.067991	level3	6.37294e+06
triptohypol A	0.726538	C30H40O6	497.29	428.818	0.830556	pos	[M+H]+	451.280034;497.291268;107.085058;95.085383;119.084662	level3	6.37027e+06
Methoxyeugenol	0.805352	C11H14O3	195.101	182.146	0.302035	pos	[M+H]+	195.084834;154.063175;163.074693;138.066474;107.048676	level2	6.34869e+06
5-Hydroxy-2-methyl-6-(11'-oxododecyl)-pyridine|5-hydroxy-2-methyl-6-(11'-oxododecyl)pyridine	0.853298	C18H29NO2	292.226	450.519	0.646235	pos	[M+H]+	292.228017;275.201527;151.111333;177.127457;293.207703	level3	6.34826e+06
(9xi,10xi,12xi)-9,10-Dihydroxy-12-octadecenoic acid	0.987919	C18H34O4	313.238	554.744	0.757653	neg	[M-H]-	313.235203;171.101903;295.227336;100.933643;163.841718	level2	6.34765e+06
Bacillisporin B	0.74473	C26H18O9	473.087	370.388	0.111301	neg	[M-H]-	473.090576;229.01436;458.058434;243.028759;228.006514	level3	6.3197e+06
Tropolone	0.999113	C7H6O2	123.044	949.722	2.706	pos	[M+H]+	123.043776;95.049107;124.038974;96.04458;67.054228	level3	6.31623e+06
hexadeca-2E,9Z,12Z,14E-tetraenoic acid isobutylamide	0.816002	C20H33NO	304.262	496.861	2.23183	pos	[M+H]+	304.2616;98.059629;95.084992;81.070321;67.054491	level3	6.30141e+06
cleistanthin D	0.903888	C29H30O11	553.163	130.264	10.6261	neg	[M-H]-	553.167869;323.0966;89.024542;71.013794;59.013757	level3	6.26059e+06
Gracillin	0.986654	C45H72O17	885.478	702.122	0.579582	pos	[M+H]+	885.477929;885.509555;629.243796;886.521483;659.363947	level2	6.23564e+06
2-O-(9-oxooctadec-cis-12-enoyl)glycerol	0.832379	C21H38O5	371.279	278.298	2.21592	pos	[M+H]+	371.275152;81.070008;279.228977;95.085819;67.054362	level3	6.2293e+06
(Z,Z)-8xi-acetoxy-5xi-hydroxydodeca-2,6-dienoic acid	0.823055	C14H22O5	269.14	248.001	2.42364	neg	[M-H]-	269.13728;155.107502;225.148972;181.087021;207.139918	level3	6.20115e+06
Phaseolinic acid	0.968654	C11H18O4	213.113	254.863	0.551199	neg	[M-H]-	169.123493;213.113125;151.113183;195.103744;97.065034	level3	6.20037e+06
lantanoside	0.88185	C16H28O8	347.17	604.515	2.1012	neg	[M-H]-	301.166171;217.072761;285.137252;53.604304;94.859483	level3	6.19792e+06
10-di-O-pyrrolecarbonylryanodine	0.939753	C30H38N2O10	585.25	507.127	1.57126	neg	[M-H]-	585.246732;100.933573;65.029052;567.235791;99.924988	level3	6.17175e+06
SCHEMBL10685062	0.91499	C23H36O6	409.256	430.307	2.88974	pos	[M+H]+	409.252159;107.049048;287.092309;181.048472;410.256391	level3	6.15297e+06
Syringaldehyde	0.957508	C9H10O4	183.064	101.52	3.12149	pos	M+H	123.043817;95.049289;155.069254;183.064741;140.046764	level1	6.14335e+06
Obtusifolin	0.994468	C16H12O5	285.075	205.04	0.445514	pos	M+H	285.076668;270.053172;253.051439;225.052511;286.078359	level1	6.13929e+06
(R)-Pelletierine	0.621029	C8H15NO	142.122	677.25	1.33716	pos	[M+H]+	142.122415;118.967385;97.100724;83.085277;125.095844	level2	6.10544e+06
Azelaic acid	0.994762	C9H16O4	187.097	145.212	2.64462	neg	[M-H]-	125.097403;187.096608;97.066125;123.081736;57.034417	level2	6.10007e+06
5,4'-Dihydroxy-3,8,3'-trimethoxy-7-prenyloxyflavone	0.639065	C23H24O8	427.141	341.722	1.49068	neg	[M-H]-	427.177029;116.928999;391.125255;100.933241;303.125084	level3	6.09831e+06
Arginine	0.990755	C6H14N4O2	175.118	36.6506	2.83008	pos	[M+H]+	175.118994;70.06518;60.055365;116.06996;130.097296	level2	6.08396e+06
5-acetyloxy-3-methylpent-2-enoic acid	0.75882	C8H12O4	171.068	776.326	2.0129	neg	[M-H]-	171.067085;126.881251;144.057461;65.014555;105.045954	level3	6.07047e+06
Rigidiusculamide A	0.838408	C13H17NO4	252.122	35.9726	0.299818	pos	[M+H]+	252.121394;234.110432;71.048969;102.054362;216.086257	level3	6.06044e+06
Araliacerebroside	0.811515	C40H77NO10	732.559	820.326	1.48801	pos	[M+H]+	570.50182;552.49053;552.506117;570.485465;184.073173	level2	6.04318e+06
Desmodianone A	1	C26H28O6	437.192	456.34	0.707655	pos	[M+H]+	437.187266;438.198283;303.118063;65.878612;108.392203	level3	6.04115e+06
DTXSID20780478	0.965748	C19H36O3	313.272	700.989	2.08094	pos	[M+H]+	313.273137;57.069555;71.085637;85.100954;95.084952	level3	6.01936e+06
(1beta,2alpha,3beta,5alpha,20S)-1,3,20-trihydroxy-4,4,14-trimethylpregna-8,14-dien-2-yl 3-methylbutanoate|xylariacin C	0.728076	C29H46O5	475.34	426.344	1.76048	pos	[M+H]+	107.048679;475.338254;457.339794;95.084845;119.085371	level3	6.00347e+06
Dipermoquinon|dispermoquinone	0.972648	C30H40O5	481.295	543.619	2.65904	pos	[M+H]+	481.289721;463.284044;421.277111;439.280652;435.287925	level3	6.0016e+06
Gorlic acid	0.796224	C18H30O2	279.229	332.47	0.454775	pos	[M+H]+	279.227983;102.09118;81.06988;256.264604;123.117269	level2	5.99107e+06
Oleanolic acid 28-O-β-D-glucopyranoside	0.848525	C36H58O8	663.41	526.614	1.26178	neg	M+HCOO	455.352045;663.411447;617.40596;152.996648;595.278745	level1	5.97866e+06
Morusimic acid F	0.808726	C18H35NO4	330.263	441.657	1.36758	pos	[M+H]+	330.266288;73.028052;284.258231;212.239053;57.069601	level3	5.97366e+06
Acetaminophen	0.918181	C8H9NO2	152.07	926.255	1.61353	pos	[M+H]+	110.05935;152.068803;120.044166;153.053245;111.044622	level2	5.95834e+06
Guggulsterol-II	0.92509	C27H46O3	419.352	833.03	1.26592	pos	[M+H]+	153.054067;419.352473;141.054623;163.110512;420.355064	level3	5.95598e+06
Topsentisterol C3	0.88944	C29H48O4	461.361	761.242	2.49373	pos	[M+H]+	443.351135;425.341144;461.362087;57.069831;69.069716	level3	5.94957e+06
helipterolide 3beta-hydroxy-14-O-angelate	0.993358	C20H24O5	343.155	462.634	0.881073	neg	[M-H]-	343.153107;299.162801;243.100437;216.078722;344.162349	level3	5.92136e+06
Phytolaccagenin	0.743616	C31H48O7	515.337	465.932	2.11908	pos	M+H-H2O	515.341125;469.326835;213.164768;419.290091;211.147817	level1	5.91055e+06
Dehydroascorbic acid	0.624966	C6H6O6	173.009	134.997	0.868487	neg	[M-H]-	111.008525;85.029534;67.019015;173.082238;131.082627	level2	5.89826e+06
Phellatin	0.880846	C26H30O12	533.167	178.47	1.47153	neg	[M-H]-	533.163416;175.039494;195.064503;337.093375;161.024274	level3	5.8922e+06
4(O)-(3,3'-Dimethylallyl)-syringaalkoholangelicat|4(O)-<3,3'-Dimethylallyl>-syringaalkoholangelicat	0.991219	C19H26O5	335.182	379.745	1.41063	pos	[M+H]+	335.183138;81.069337;317.207421;336.185736;95.08527	level3	5.88336e+06
Leptolepisol C 4-O-beta-D-glucopyranoside	0.856292	C33H40O14	659.236	209.004	2.39803	neg	[M-H]-	659.227279;195.064787;180.041836;165.018421;433.153969	level3	5.88151e+06
6,10,14-Hexadecatrien-1-ol, 3,7,11,15-tetramethyl-	0.767553	C20H36O	293.282	776.924	1.80502	pos	[M+H]+	293.286176;69.069973;83.085226;97.100641;95.084917	level3	5.87863e+06
Hamabiwalactone A	0.68726	C17H24O2	261.184	701.269	1.29618	pos	[M+H]+	215.178078;261.185471;145.100826;159.116687;107.084917	level3	5.86994e+06
Gentiatibetine	0.996858	C9H11NO2	166.086	55.3463	1.31056	pos	[M+H]+	166.085615;120.080846;136.075358;167.068789;80.049572	level2	5.86523e+06
lyratin A	0.635734	C20H22O5	343.153	378.305	0.397315	pos	[M+H]+	107.048684;181.050443;175.110138;287.091142;139.039281	level3	5.86509e+06
PD 98059	0.713283	C16H13NO3	268.107	270.25	41.8797	pos	[M+H]+	268.098381;253.070684;252.063786;212.104633;224.071116	level2	5.86472e+06
3-HYDROXYKYNURENINE	0.72197	C10H12N2O4	223.073	906.335	2.30533	neg	[M-H]-	222.83996;99.926056;199.84959;181.052007;223.841617	level2	5.84515e+06
(+)-Magnoflorine	0.956758	C20H24NO4+	342.169	54.9688	0.321758	pos	[M]+	342.170233;58.065076;297.108443;265.083714;282.090092	level2	5.84489e+06
Veratrosine	0.681433	C33H49NO7	554.345	333.741	1.07113	pos	M+H-H2O	184.073875;554.351342;104.106897;86.096351;536.332493	level1	5.84442e+06
santin	0.991961	C18H16O7	345.095	402.87	1.92192	pos	[M+H]+	345.098064;330.071891;315.050533;346.099283;287.058099	level2	5.82719e+06
1beta,10beta-epoxy-8beta-ethoxy-6beta-[(2-methylacryloyl)oxy]eremophil-7(11)-12,8alpha-olide|rel-(1aR,4S,4aS,5S,8aS,9aS)-8a-ethoxy-2,3,4,4a,5,7,8a,9-octahydro-4,4a,6-trimethyl-7-oxo-1aH-oxireno[8,8a]naphtho[2,3-b]furan-5-yl 2-methylprop-2-enoate	0.765661	C21H28O6	375.185	736.905	3.02805	neg	[M-H]-	359.156342;291.088658;375.187247;159.084128;360.155466	level3	5.81849e+06
3??,7??,20,23?閳?Tetrahydroxy-11,15-dioxolanosta-8-en-26-oic acid	0.960436	C30H46O8	533.311	267.087	1.89421	neg	[M-H]-	533.311209;471.315677;489.330115;59.257711;71.050415	level3	5.81741e+06
[7]-Paradol	0.915527	C18H28O3	293.206	359.036	14.6059	pos	[M+H]+	293.207939;151.111539;275.202078;95.085132;81.069159	level3	5.81522e+06
12-dehydroxyghalakinoside	0.825225	C29H42O10	551.28	565.722	2.27156	pos	[M+H]+	551.277553;107.048995;315.124407;552.288867;385.233557	level3	5.80733e+06
7,8-Dihydrobuddlenol B	0.719609	C31H38O11	585.233	220.544	1.86074	neg	[M-H]-	165.056454;537.205592;150.03306;195.064653;359.149333	level3	5.80718e+06
Kusunokinin	0.802906	C21H22O6	371.15	407.645	5.77011	pos	[M+H]+	97.063946;55.017934;107.048978;371.147251;353.353099	level3	5.80207e+06
beta-D-Glucosamine	1	C6H13NO5	180.086	174.057	0.65598	pos	[M+H]+	120.044248;181.048078;108.044684;180.100482;152.069901	level2	5.80109e+06
MG(16:0/0:0/0:0)[rac]	0.870147	C19H38O4	331.284	651.139	1.7146	pos	[M+H]+	313.272244;57.069929;71.085478;239.235873;95.084781	level2	5.78753e+06
Achyrofuran	0.712499	C32H40O8	551.271	122.393	0.155951	neg	[M-H]-	505.259356;89.024294;149.045071;71.01363;101.024676	level3	5.77617e+06
Octadecanedioic acid	0.992194	C18H34O4	313.238	366.296	0.696448	neg	[M-H]-	313.235084;295.227087;169.123177;314.242157;311.222038	level3	5.76723e+06
(5R,6S,9S,10S,12S)-15,16-epoxy-2-oxo-6-O-(beta-D-glucopyranosyl)-cleroda-3,7,13(16),14-tetraen-17,12-olid-18-oic acid methyl ester	0.804879	C27H32O12	547.183	237.563	1.17256	neg	[M-H]-	385.126968;125.023598;547.108552;207.030146;299.12734	level3	5.75543e+06
7-hydroxy-3,4-dihydrocadalin	0.912781	C15H20O	217.158	438.1	1.0077	pos	[M+H]+	217.157803;161.096362;175.110832;135.080615;121.064529	level3	5.74664e+06
Ouabanginone	0.900315	C26H34O5	427.251	803.366	2.15024	pos	[M+H]+	427.254481;229.001926;214.984983;213.004965;197.010829	level3	5.73903e+06
monaphilone C	0.999716	C20H32O4	337.234	469.714	0.706795	pos	[M+H]+	337.23279;95.085121;338.238472;81.069612;69.069348	level3	5.73781e+06
Queretaroic-30-caffeat	0.727019	C39H54O7	635.391	602.081	2.82294	pos	[M+H]+	163.040034;437.340232;203.179031;181.047524;147.043302	level3	5.72148e+06
3alpha-3-Hydroxy-28-nor-11,13(18),17(22)-oleanatrien-21-one|Papyriogenin I	0.793121	C29H42O2	423.325	600.585	0.850495	pos	[M+H]+	423.328263;187.147376;189.164451;95.084728;201.164208	level3	5.72096e+06
2H-Pyran-3-ol, 6-ethenyltetrahydro-2,2,6-trimethyl-, 3-acetate	0.721915	C12H20O3	213.148	432.886	0.491168	pos	[M+H]+	213.165438;157.100754;171.116911;81.069232;143.085044	level3	5.70141e+06
Cyclo(Phe-Pro)	0.789313	C14H16N2O2	245.128	126.384	1.30047	pos	[M+H]+	245.125441;120.080824;70.065165;98.059801;154.072782	level3	5.69178e+06
OXOPROLINE	0.958468	C5H7NO3	128.035	32.9689	0.384215	neg	[M-H]-	128.034736;41.998529;86.024647;85.029773;129.019648	level2	5.68724e+06
(7E)-2beta,3alpha-dihydroxy-megastigm-7-en-9-one	0.79922	C13H22O3	227.164	147.409	1.1027	pos	[M+H]+	191.143547;151.111134;109.100956;107.084608;121.101021	level3	5.68038e+06
Licoflavone B	0.653385	C25H26O4	389.164	317.576	22.9506	neg	M-H	389.090963;345.167984;221.046413;327.089209;179.03414	level1	5.67189e+06
flindercarpin-2	0.749346	C32H40O13	631.242	547.13	1.47315	neg	[M-H]-	631.357012;543.262769;161.02385;102.933028;587.374568	level3	5.67154e+06
baicalin	0.901078	C21H20O10	431.105	386.009	15.0822	neg	[M-H]-	371.078651;431.095978;399.071129;221.045988;137.024865	level3	5.65174e+06
Cirsimaritin	0.906837	C17H14O6	315.085	368.725	1.20344	pos	M+H	315.084441;300.062817;299.054443;271.057648;282.051768	level1	5.55386e+06
(E)-5-(Methylthio)-1-phenyl-4-penten-2-yn-1-one|trans-5-Methylthio-1-phenylpent-4-en-2-in-1-on	1	C12H10OS	203.052	32.758	1.16553	pos	[M+H]+	203.050962;204.054752;191.014508;52.994764;105.863801	level3	5.55138e+06
Demethoxyyangonin	0.986447	C14H12O3	229.085	362.37	1.33076	pos	[M+H]+	229.085279;155.085274;101.022816;183.07988;230.092139	level2	5.55014e+06
Convolvidine	0.635225	C34H44N2O8	607.295	243.273	3.16324	neg	[M-H]-	561.283701;101.023698;71.013737;89.024443;113.023665	level3	5.54262e+06
3-(3,4-dihydroxyphenyl)prop-2-enal	0.858338	C9H8O3	165.054	393.842	0.8904	pos	[M+H]+	147.044106;165.055117;121.064752;119.04847;103.054017	level3	5.51178e+06
Myriceric acid A	0.976634	C39H52O7	631.363	542.663	0.393197	neg	[M-H]-	631.357281;161.024307;587.377172;135.044858;70.152639	level3	5.50514e+06
Gentiopicroside	0.800009	C16H20O9	374.143	36.2138	3.53627	pos	M+NH4	177.053952;195.063831;145.027367;374.160349;85.028164	level1	5.50091e+06
Pinobatol	0.743205	C30H36O10	555.224	128.732	2.12133	neg	[M-H]-	507.206727;165.055048;555.220257;150.031761;359.152263	level3	5.49863e+06
(3Z,4R)-4-(1,3-benzodioxol-5-ylmethyl)dihydro-3-[(4-hydroxy-3-methoxyphenyl)methylene]furan-2(3H)-one|4'-O-methylsalicifolin	0.899481	C21H22O6	371.148	370.182	0.97622	pos	[M+H]+	107.049004;371.147272;327.119373;353.13848;221.08176	level3	5.46915e+06
2-Methoxy-4-vinylphenol	0.98334	C9H10O2	151.075	186.629	1.26914	pos	[M+H]+	151.075724;91.053646;119.048369;45.033447;43.017639	level2	5.45314e+06
Octadecyl 3-(4-hydroxyphenyl)prop-2-enoate	0.721282	C27H44O3	417.336	851.97	2.35513	pos	[M+H]+	153.054052;417.339526;57.069558;193.084593;71.085668	level3	5.4066e+06
L-Lysopine	0.614511	C9H18N2O4	219.134	808.349	2.68271	pos	[M+H]+	219.1378;136.085911;177.113199;178.109842;137.081986	level2	5.39694e+06
Porphobilinogen	0.611517	C10H14N2O4	225.089	873.931	1.83244	neg	[M-H]-	106.041116;224.938944;198.077197;118.898885;135.902264	level2	5.3857e+06
8-hydroxy-2-(6'-phenylhexyl)-5,6,7,8-tetrahydrochromone	0.989033	C21H26O3	325.184	908.556	1.11594	neg	[M-H]-	325.183884;183.011349;325.668033;261.086258;268.094998	level3	5.38304e+06
(2E)-2-methyl-6-[(3aS,7S,9aR)-3,3a,5,6,7,8,9,9a-octahydro-7-hydroxy-3a-methyl-8-oxocyclopenta[b]chromen-1-yl]hept-2-en-1-yl acetate|TCA B	0.999919	C23H32O5	389.229	506.302	0.624179	pos	[M+H]+	389.229701;390.232875;95.08496;187.148283;81.069289	level3	5.3811e+06
3-Hydroxydodecanoic acid	0.675487	C12H24O3	215.165	463.248	0.621768	neg	M-H	59.013766;215.166632;125.873588;197.857232;126.881434	level1	5.38047e+06
Rubrynolide	0.977238	C17H28O4	295.191	451.303	1.15814	neg	[M-H]-	295.190914;251.200192;277.182725;233.192148;259.168861	level3	5.36149e+06
8beta-angeloyloxy-9beta-hydroxy-guaia-13-methoxy-6(12),4(14)-diolide	0.91114	C21H28O8	407.174	267.343	0.498683	neg	[M-H]-	407.172014;80.964691;307.189702;125.097449;325.198485	level3	5.32607e+06
Pestalotiopsoid A	0.796873	C11H15NO5	242.102	40.7079	1.61858	pos	[M+H]+	242.09989;81.03328;196.096968;97.028333;70.065112	level3	5.31184e+06
Adian-5-ene ozonide	0.787129	C30H50O3	459.381	650.917	1.74002	pos	[M+H]+	441.376596;219.17241;459.391223;207.174914;189.163943	level3	5.31021e+06
Kermadecin C	0.716921	C31H40O5	493.291	689.22	0.28446	pos	[M+H]+	339.285784;155.010827;475.276281;98.98329;69.069694	level3	5.29157e+06
Di(2-ethylhexyl)phthalate (DEHP)	0.969673	C24H38O4	391.283	798.444	0.0767806	pos	[M+H]+	149.021967;71.085592;57.069569;167.032475;150.026681	level2	5.272e+06
Dunnisinoside	0.704857	C26H30O13	549.164	120.013	3.25892	neg	[M-H]-	387.146135;161.045906;181.051816;151.039336;101.02471	level3	5.25804e+06
Garcinielliptone FA	0.660545	C29H42O2	423.325	623.798	0.684093	pos	[M+H]+	423.317848;187.148859;201.161996;95.085014;107.085037	level3	5.23641e+06
3'-Hydroxyaglaine C	0.625425	C36H42N2O9	645.287	218.631	0.895523	neg	[M-H]-	645.292069;329.233476;241.013222;152.996585;171.101903	level3	5.23505e+06
cyathisterol	0.996699	C28H42O2	409.31	806.963	0.179547	neg	[M-H]-	409.310481;335.236612;410.314411;353.250633;152.996695	level3	5.22538e+06
Curtisian E	0.81622	C37H36O12	671.215	605.155	1.63562	neg	[M-H]-	671.211001;78.95929;255.233226;116.928052;152.9967	level3	5.21237e+06
蔚-Caprolactam	0.953534	C6H11NO	114.091	49.2152	1.04197	pos	[M+H]+	114.091539;97.028075;72.937193;69.069818;79.053791	level2	5.21044e+06
HEPTADECA-1,8,11,14-TETRAENE	0.778909	C17H28	233.226	572.166	1.09791	pos	[M+H]+	233.227287;121.101227;135.116312;81.069288;67.053776	level3	5.20551e+06
epi-regaloside F	0.910527	C19H26O11	429.14	47.1362	1.55619	neg	[M-H]-	175.039539;193.049781;429.14561;134.037129;160.016097	level3	5.20046e+06
11beta,13-dihydrozinangustolide	0.979364	C20H34O5	355.244	299.334	1.43077	pos	[M+H]+	355.242647;356.248292;73.027999;323.087855;89.059571	level3	5.19788e+06
7'-multijuguinone	0.639348	C18H29NO2	292.226	343.05	0.534454	pos	[M+H]+	275.201285;170.116244;107.08465;293.212489;57.069898	level3	5.16147e+06
N-Malonyltryptophan	0.83952	C14H14N2O5	289.083	98.363	1.38098	neg	[M-H]-	245.092037;203.082229;74.024291;80.965471;116.035692	level3	5.15734e+06
pyxidatol A|rel-(1R,2R,2aS,3S,4R,4aS,7aR,7bR)-decahydro-3-(hydroxymethyl)-6,6,7b-trimethyl-2aH-cyclobut[e]indene-1,2,2a,3,4-pentol	0.722773	C15H26O6	303.179	728.919	2.92303	pos	[M+H]+	303.047583;208.88294;226.895435;171.01488;280.866405	level3	5.14277e+06
ptychantin E	0.785857	C24H38O7	439.268	265.654	1.02045	pos	[M+H]+	439.235239;277.216806;259.205762;133.101372;175.14966	level3	5.14183e+06
(2S)-1-O-linolenoyl-2-O-linoleoyl-3-O-[alpha-D-galactopyranosyl-(1''->6')-beta-D-galactopyranosyl]glycerol	0.95012	C51H86O15	939.6	874.673	1.3875	pos	[M+H]+	939.611313;683.350867;940.615124;939.473048;659.364841	level3	5.13182e+06
MCULE-4499116446	0.741452	C31H58O14	655.387	589.378	1.41229	pos	[M+H]+	313.272666;331.284215;89.059594;239.236443;95.084967	level3	5.13114e+06
2-Methoxy-1-(9H-pyrido(3,4-b)indol-1-yl)ethanol	0.680443	C14H14N2O2	243.112	59.5436	0.53703	pos	[M+H]+	195.090142;243.111266;225.101147;207.090082;86.096059	level3	5.12318e+06
12-Oxogeranyllinalool	0.840224	C20H32O2	305.247	221.801	0.669293	pos	[M+H]+	305.245001;287.237921;288.122291;269.225146;163.147722	level3	5.10631e+06
quaesitol	0.651609	C33H44O5	521.331	518.018	2.53185	pos	[M+H]+	521.329018;104.10664;184.073493;186.076965;185.076126	level3	5.09821e+06
Cytochalasin Ohyp	0.646229	C30H39NO7	526.277	199.973	0.747017	pos	[M+H]+	349.235328;490.260741;229.142515;392.183942;527.255858	level3	5.09221e+06
2-nor-1,2-secoferulenol	0.717635	C23H32O2	341.246	452.832	3.16428	pos	[M+H]+	107.048729;341.245055;235.098245;95.08584;323.234652	level3	5.06883e+06
3beta-acetoxy-ent-labd-8(17)-en-15-oic acid	0.779571	C22H36O4	365.267	703.212	1.05133	pos	[M+H]+	263.198361;57.069596;85.06428;365.270458;264.20548	level3	5.04476e+06
Penicitrinol A	0.931367	C23H26O5	381.174	772.769	2.3575	neg	[M-H]-	381.172106;116.928975;100.933331;84.938389;99.925911	level3	5.03856e+06
7alpha-chloro-6beta-hydroxyconfertifoline	0.653539	C15H21ClO3	285.125	47.307	6.28728	pos	[M+H]+	285.123035;207.089983;267.110726;208.098891;206.084657	level3	5.01499e+06
trans-Zeatin	0.851125	C10H13N5O	202.108	780.26	1.28501	pos	M+H-H2O	202.109562;161.081415;162.089786;175.096528;134.070723	level1	5.01042e+06
Cigatin B	0.901562	C12H11NO3	218.08	40.005	0.847591	pos	[M+H]+	218.078756;188.070564;120.044566;190.08647;172.074706	level3	5.00566e+06
6-oxo-6a,12a-dehydrodeguelin|9,10-dimethoxy-3,3-dimethyl-3H-pyrano[2,3-c;6,5-f'] dichromium ene-7,13-dione|9,10-Dimethoxy-3,3-dimethyl-3H-pyrano[2,3-c;6,5-f']dichromen-7,13-dion|villosinol	1	C23H18O7	407.109	256.363	1.20571	pos	[M+H]+	407.104209;408.11134;89.059542;59.049298;221.081926	level3	4.99546e+06
Muellitol	0.696439	C21H36O6	385.257	372.576	2.41465	pos	[M+H]+	105.033595;385.187416;224.108245;107.049178;147.117205	level3	4.97479e+06
Liquiritin apioside	0.677921	C26H30O13	531.152	166.883	3.09142	neg	[M-H]-	193.049666;531.159462;175.039517;134.037102;337.09251	level2	4.97283e+06
HC Toxin	0.674364	C21H32N4O6	435.218	125.07	11.7567	neg	[M-H]-	435.227378;341.06421;111.00861;59.013679;389.220236	level3	4.94682e+06
(Z)-1-(4,5-Methylenedioxy-2-methoxycinnamoyl)pyrrolidine|N-[3-(3',4'-methylenedioxy,6'-methoxyphenyl)-2(Z)-propenoyl]pyrrolidine|N-[3-(6'-Methoxy-3',4'-methylenedioxyphenyl)-2(Z)-propenoyl]pyrrolidine	0.83681	C15H17NO4	276.122	40.2781	1.02263	pos	[M+H]+	276.119367;230.139771;161.059379;258.134548;131.048897	level3	4.92653e+06
Dimethyl 3-methoxy-4-oxo-5-(8,11,14-pentadecatrienyl)-2-hexenedioate	0.677166	C24H36O6	421.257	444.448	0.354842	pos	[M+H]+	421.317946;275.199768;69.033228;129.054031;119.085008	level2	4.92267e+06
(blumenol C) 9-O-beta-gentiobioside	0.853121	C25H42O12	535.274	162.294	0.462985	pos	[M+H]+	211.169146;193.157802;135.115958;109.10093;175.14913	level3	4.91583e+06
p-Mentha-1,3,8-triene	0.980213	C10H14	135.116	677.506	3.50043	pos	[M+H]+	135.116332;107.084871;93.069889;136.086707;79.053932	level2	4.89566e+06
velutin	0.999935	C17H14O6	315.085	336.595	0.947497	pos	M+H	315.08442;300.062155;272.067435;316.086994;188.070469	level1	4.8719e+06
Cyathin C5	0.901828	C20H26O5	347.183	366.777	2.51082	pos	[M+H]+	347.185115;301.176775;231.100303;275.27851;259.170679	level3	4.86765e+06
(S)-Abscisic acid	0.932628	C15H20O4	263.128	200.108	2.36133	neg	[M-H]-	153.09204;219.137541;204.114544;201.12718;263.129456	level2	4.86544e+06
Inulanolide A	0.638146	C34H44O9	595.297	176.669	0.781155	neg	[M-H]-	549.290947;595.141275;417.250131;125.024255;71.014065	level3	4.8566e+06
1,2,3,6-Tetrahydro-3-hydroxy-2-pyridinecarboxylic acid	1	C6H9NO3	142.051	34.5599	0.604804	neg	[M-H]-	142.051099;143.054608;96.045815;63.619279;78.343179	level3	4.82936e+06
2-methyl-2,4-heptadien-6-one	1	C8H12O	125.096	655.539	3.13732	pos	[M+H]+	125.095543;126.101813;55.053993;81.069787;59.060487	level3	4.80433e+06
Styraxlignolide B	0.684041	C26H28O12	531.152	243.595	1.60128	neg	[M-H]-	531.145412;265.087624;339.0859;413.124445;398.097161	level3	4.80174e+06
CHEMBL2334354	0.827351	C17H12O8	343.046	167.203	2.20081	neg	[M-H]-	315.052658;343.213801;209.071461;165.0182;171.101846	level3	4.79542e+06
2-(2-methyl-3-en-2-yl)-1H-indole-3-carbaldehyde	0.714246	C14H15NO	214.122	329.213	0.030112	pos	[M+H]+	196.110164;214.124913;181.088043;156.081319;172.111127	level3	4.78632e+06
haploparvone	0.948788	C20H32O3	321.241	419.184	3.49958	pos	[M+H]+	321.240275;303.231397;179.141452;123.079836;107.084911	level3	4.75608e+06
DL-Dopa	0.686425	C9H11NO4	196.062	874.512	3.2994	neg	[M-H]-	160.842462;196.062487;169.05209;142.040599;65.014673	level2	4.73544e+06
Androstane-1,17-dione	0.858837	C19H24O2	285.184	490.938	1.25094	pos	[M+H]+	285.186592;215.105968;267.173536;197.097139;225.125476	level3	4.73491e+06
3,3'-Dimethoxyurabaine	0.775171	C38H36N2O6	617.267	513.462	1.77235	pos	[M+H]+	617.272156;437.20822;283.01972;265.00645;176.991957	level3	4.7174e+06
Corchorusoside E	1	C41H64O19	861.405	479.904	1.50474	pos	[M+H]+	861.407234;862.410673;537.306971;95.714605;347.09197	level3	4.70879e+06
S-Japonin	0.789601	C19H28O3S	335.171	105.475	1.14867	neg	[M-H]-	335.169722;173.118017;59.01369;71.013713;101.024737	level3	4.70273e+06
Desmethyldiaportinol	0.797904	C12H12O6	253.07	46.3233	0.00290171	pos	[M+H]+	205.04871;235.059683;121.027593;55.017749;253.069753	level3	4.68787e+06
hexadeca-4,7,10,13-tetraenoic acid	0.796704	C16H24O2	249.185	564.442	2.01262	pos	[M+H]+	203.179682;249.182835;133.101415;205.19324;119.085898	level3	4.68555e+06
DIHEXYL PHTHALATE	0.987174	C20H30O4	335.219	444.718	2.24174	pos	[M+H]+	233.153958;335.218389;57.069979;317.209555;336.253836	level3	4.67621e+06
Methyl 5-(1,2-dihydroxypropyl)pyridine-2-carboxylate	0.667485	C10H13NO4	212.091	56.2227	1.20244	pos	[M+H]+	70.065146;212.089775;194.08007;125.023296;115.038222	level3	4.67142e+06
1-Linoleoyl Glycerol	0.98324	C21H38O4	355.284	556.397	2.6538	pos	[M+H]+	263.238335;245.226144;81.069883;95.085779;67.054267	level2	4.67056e+06
Demethoxyencecalin	0.726382	C13H14O2	219.102	412.572	2.72923	neg	M-H+H2O	219.102697;164.048146;149.02362;160.088916;121.029657	level1	4.65849e+06
picranoside-A|Picrasinoside A|picrasinoside-A	0.870883	C27H38O11	537.238	285.543	2.12258	neg	[M-H]-	537.235216;79.957303;63.962331;329.23369;191.075543	level3	4.65495e+06
CHEMBL465512	0.739122	C25H22O9	465.118	197.381	1.82994	neg	[M-H]-	341.064633;465.115875;217.01558;189.018791;177.018508	level3	4.65321e+06
ehletianol D	0.809777	C26H32O11	519.181	182.394	11.479	neg	[M-H]-	175.039792;519.185941;160.016119;337.094089;166.064027	level3	4.65227e+06
(2'S)-1-O-(9-oxo-10(E),12(E)-octadecadienoyl) glycerol	0.891066	C21H36O5	369.263	555.774	0.546635	pos	[M+H]+	351.249484;277.217885;151.110867;69.069828;81.070009	level3	4.6506e+06
Euscamine A	0.647824	C9H13NO5	216.086	35.4481	0.353882	pos	[M+H]+	216.124418;97.028045;198.113423;143.057982;170.081311	level3	4.6441e+06
passifloricin C	0.745599	C28H52O7	499.365	776.231	3.04772	neg	[M-H]-	125.09759;255.233461;499.368374;187.096969;261.133334	level3	4.63961e+06
8-hydroxy-2,6-dimethyloct-2-enoic acid	0.877559	C10H18O3	185.118	359.767	1.71694	neg	[M-H]-	185.119275;140.964234;98.9539;97.066241;100.933658	level3	4.63763e+06
5-Hydroxy-6,7-dimethoxyflavone	0.984972	C17H14O5	299.09	311.499	1.8576	pos	[M+H]+	299.09206;284.068324;243.101827;300.093833;256.07384	level2	4.63272e+06
FT-0672731	0.827397	C29H34O8	509.223	79.5534	0.658912	neg	[M-H]-	463.219466;331.177746;161.046046;101.023678;71.013735	level3	4.62736e+06
(3R,5aR,5bR,7R,9S,11aR,13R,13bS)-7-(acetyloxy)-9-hydroxy-5a,5b,11a,13b-tetramethyl-8-methylidene-3-(prop-1-en-2-yl)icosahydro-1H-cyclopenta[a]chrysen-13-yl benzoate|6beta-(acetyloxy)-12beta-(benzoyloxy)-21alphaH-24-norhopa-4(23),22(29)-dien-3beta-ol|cavalerol H	0.944124	C38H52O5	587.374	737.503	0.836799	neg	[M-H]-	587.376679;145.029369;119.05047;65.26449;118.042033	level3	4.61303e+06
Esculentoside B	0.617665	C35H54O11	649.355	339.501	4.0338	neg	[M-H]-	649.364455;116.928966;101.024704;71.013602;113.024679	level3	4.60807e+06
Iristectorigenin A	0.999286	C17H14O7	331.081	335.76	2.61212	pos	M+H	331.080798;316.059045;315.049892;332.081687;288.062064	level1	4.6025e+06
3,4-Dihydro-2H-1-benzopyran-2-one	0.918389	C9H8O2	149.059	467.952	1.38951	pos	[M+H]+	149.059065;105.033491;108.04405;131.048648;126.054865	level2	4.59926e+06
Hyuganoside IV	0.687039	C20H28O11	443.156	243.576	1.14785	neg	[M-H]-	137.0251;443.158458;93.03442;179.034064;59.013966	level3	4.59513e+06
Antiarol	0.979363	C9H12O4	185.08	54.7225	0.665957	pos	M+H	153.054067;185.079092;125.060237;154.061425;110.036048	level1	4.57792e+06
2-O-p-Cumaroylglycerol	0.841502	C12H14O5	237.077	70.9235	0.248181	neg	[M-H]-	145.029319;237.078385;119.050466;163.039234;117.034177	level3	4.5608e+06
(+/-)-celallocinnine|2-phenyl-9-(3-phenyl-acryloyl)-1,5,9-triaza-cyclotridecan-4-one|caesalpinine C|celallocinine|Celallocinnin|Celallocinnine	0.749701	C25H31N3O2	406.246	604.625	3.7598	pos	[M+H]+	406.2477;264.17448;279.195723;270.122225;210.127493	level3	4.55713e+06
threo-Guaiacylglycerol-beta-O-4'-dehydrodisinapyl ether	0.778922	C31H36O11	583.216	219.243	2.71397	neg	[M-H]-	165.056473;535.194019;150.033014;195.064629;357.132022	level3	4.55409e+06
kidjoranin 3-O-alpha-diginopyranosyl-(1->4)-beta-cymaropyranoside	0.887004	C44H62O13	797.408	684.59	0.305582	neg	[M-H]-	797.418586;225.112691;241.012491;243.123075;255.232694	level3	4.54515e+06
4-hydroxy-5-pentyloxolan-2-one	0.651676	C9H16O3	171.103	391.793	2.7364	neg	[M-H]-	171.102128;127.077101;125.097644;109.065329;83.050278	level3	4.54456e+06
Abbreviatin PB	0.720953	C22H26O8	419.169	220.16	0.0785018	pos	[M+H]+	181.05064;209.081505;167.070737;419.162201;191.071226	level3	4.53483e+06
(+)-hinokinin	0.762029	C20H18O6	355.117	196.645	0.387694	pos	[M+H]+	355.114154;137.059805;201.054583;337.108031;263.069709	level3	4.52047e+06
O-TOLUENESULFONAMIDE	0.834201	C7H9NO2S	172.042	57.0924	1.41628	pos	[M+H]+	172.042094;127.044194;70.065178;126.036212;112.075535	level3	4.51323e+06
1-ethynylbenzene|1-phenylacetylene|1-phenyleth-1-yne|Ethynylbenzene|phenyalcetylene|phenyl acethylene|phenylacetylene	0.965411	C8H6	103.054	219.221	0.107563	pos	[M+H]+	103.053967;95.049356;105.044985;43.017658;77.037998	level3	4.50628e+06
Regaloside B	0.948781	C20H26O11	441.139	112.442	0.399684	neg	[M-H]-	163.039275;119.050403;441.139523;145.029324;59.013806	level3	4.49753e+06
[12]-Gingerol	0.780323	C23H38O4	377.272	767.626	0.0882184	neg	[M-H]-	116.929322;377.087541;162.839469;178.646553;159.44669	level3	4.4887e+06
Pyrrolo[1,2-a]pyrazine-1,4-dione, hexahydro-3-[(4-hydroxyphenyl)methyl]-	0.685946	C14H16N2O3	261.13	40.1601	31.7419	pos	[M+H]+	261.124212;136.075217;70.065139;188.070318;107.048933	level2	4.48165e+06
(+)-decytospolide A|decytospolide A	0.957611	C14H26O3	241.181	396.546	0.319926	neg	[M-H]-	241.179232;185.119163;223.171794;239.164434;178.999637	level3	4.48163e+06
Arizonicanol D	0.784378	C21H22O6	371.146	115.722	0.616334	pos	[M+H]+	371.147219;107.048741;167.070752;149.095694;217.084234	level3	4.47621e+06
Marrulanic acid	0.706525	C18H28O5	323.186	310.799	0.142247	neg	[M-H]-	279.198559;323.187633;219.176535;305.176556;59.013739	level3	4.45931e+06
Cerebroside B	0.772887	C41H77NO9	728.565	848.859	0.3413	pos	[M+H]+	276.267076;710.550055;548.506449;530.490742;548.491031	level2	4.44308e+06
(2S,2'S,3R,3'R,4S,4'S)-(-)-botryodiplodin dimer	0.923793	C14H22O5	271.154	188.38	1.5852	pos	[M+H]+	271.057735;225.100862;253.096977;81.070165;272.062075	level3	4.43975e+06
cis-9,10-Epoxystearic acid	0.974613	C18H34O3	297.243	598.282	1.54896	neg	M-H	297.240774;279.232302;155.107637;191.034302;183.011995	level1	4.42138e+06
5,9-dimethyltetracyclo[11.2.1.0¹,¹⁰.0⁴,⁹]hexadecane-5,14-dicarboxylic acid	0.836053	C20H30O4	352.255	368.398	23.3077	pos	[M+NH4]+	352.248026;180.101606;198.110914;152.070406;108.080136	level2	4.41913e+06
(R)-5-Oxopyrrolidine-2-carboxylic acid	0.961165	C5H7NO3	130.049	33.5346	2.91867	pos	M+H	84.044251;130.049194;70.065175;85.04712;112.08696	level1	4.39983e+06
guaiazulene	0.728536	C15H18	199.148	259.762	0.652154	pos	[M+H]+	199.148968;171.116881;157.100688;143.085047;170.108528	level3	4.37429e+06
taxuspine C	0.801022	C34H40O10	607.25	386.595	3.13839	neg	[M-H]-	607.254275;291.196691;152.996666;241.012793;78.959329	level3	4.36355e+06
1-(4-hydroxy-2,6,6-trimethylcyclohexen-1-yl)but-2-en-1-one	0.744421	C13H20O2	209.153	392.168	1.22006	pos	[M+H]+	137.096627;209.151404;163.148036;121.101388;107.084993	level3	4.35643e+06
(-)-sequosempervirin A|(4R)-4-(4-hydroxybenzyl)spiro[4,5]dec-1-en-8-ol|(4R,5r,8R)-4-(4-hydroxybenzyl)spiro[4.5]dec-1-en-8-ol|sequosempervirin A	0.717143	C17H22O2	259.169	450.539	2.06715	pos	[M+H]+	259.170654;145.100569;199.148323;157.100253;159.116554	level3	4.33821e+06
Viridene	0.989442	C11H16	149.132	677.506	0.00993823	pos	[M+H]+	149.131231;93.069901;107.084899;81.069179;150.102036	level3	4.33195e+06
Perillartine	0.71699	C10H15NO	166.122	26.07	0.943665	pos	[M+H]+	166.12207;107.049068;93.069958;43.017669;167.032532	level2	4.32979e+06
3-(4-Hydroxycinnamoyl)-3alpha-3-Hydroxy-7,9(11)-multifloradien-29-oic acid|bryocoumaric acid	0.697595	C39H52O5	601.386	640.858	1.64884	pos	[M+H]+	147.044015;437.341374;119.048333;203.179145;339.286742	level3	4.32539e+06
4-methoxy-6-methyloxane-2,5-diol	0.826404	C7H14O4	161.082	48.4008	2.00857	neg	[M-H]-	161.080543;99.044841;117.055296;59.013761;71.050385	level3	4.32259e+06
visclerodol acid	0.69024	C24H40O7	441.282	373.74	1.90362	pos	[M+H]+	441.337235;81.06992;147.116268;95.084786;111.044144	level3	4.31943e+06
6-methoxypodophyllotoxin 7-glucoside	0.871931	C29H34O14	605.187	185.53	0.537186	neg	[M-H]-	443.137661;193.049951;134.037102;175.039695;149.060804	level3	4.31528e+06
1-O-benzoylkarasamine	1	C30H41NO5	496.295	407.038	18.5498	pos	[M+H]+	496.307478;497.30591;55.146005;99.08043;450.300078	level3	4.31237e+06
3beta-hydroxy-4alpha(3)-dihydrosantamarine|4alpha(15)-dihydroridentin B	0.896494	C15H22O4	267.159	284.651	2.61673	pos	[M+H]+	151.075318;123.043591;137.059296;249.149728;121.100748	level3	4.30819e+06
(6R)-menthiafolic acid 6-O-beta-D-quinovoside|(6R)-menthiafolic acid-6-O-beta-D-quinovoside|menthiafolic acid 6-O-beta-D-quinovopyranoside	0.677731	C16H26O7	329.161	220.076	2.92587	neg	[M-H]-	227.128701;183.139728;165.127628;96.960447;251.128342	level3	4.30782e+06
panduratin H	0.994249	C20H26O2	299.2	414.339	0.182312	pos	[M+H]+	299.19762;145.100911;300.200583;131.085938;284.177469	level3	4.30223e+06
(+)-Pinoresinol	0.818175	C20H22O6	357.134	129.165	3.06259	neg	[M-H]-	151.039577;136.016289;357.13113;130.086739;342.110716	level2	4.29577e+06
CHEMBL355660	0.606849	C11H15NO4	226.107	43.7925	1.67453	pos	[M+H]+	130.049185;226.068922;97.028294;84.044193;208.098725	level3	4.29519e+06
lagochilin 3,15-diacetate	0.631384	C24H40O7	441.283	478.502	1.02091	pos	[M+H]+	277.21778;441.344065;81.069971;95.084774;93.069598	level3	4.26132e+06
Uvarigranol C	0.604701	C23H24O7	411.147	423.015	1.32729	neg	[M-H]-	116.929078;411.105413;100.93337;375.126986;261.077193	level3	4.25962e+06
Deacetylphomoxanthone B	0.913708	C34H34O14	665.189	182.972	4.38562	neg	[M-H]-	665.178718;163.03933;229.014316;119.050443;501.141637	level3	4.25586e+06
methyl (1S,4aR,7aR)-4a-hydroxy-7-(hydroxymethyl)-1-[(2S,3R,4S,5S,6R)-3,4,5-trihydroxy-6-(hydroxymethyl)oxan-2-yl]oxy-5,7a-dihydro-1H-cyclopenta[c]pyran-4-carboxylate	0.731059	C17H24O11	403.131	37.9285	16.2299	neg	[M-H]-	181.072156;203.033655;159.045763;221.046015;59.013613	level2	4.23234e+06
Squarroside A1	0.897246	C37H60O10	663.41	508.553	0.866141	neg	[M-H]-	663.411484;455.356187;617.407777;485.325516;664.198111	level3	4.22793e+06
PYRENOCINE M	0.932711	C12H18O4	225.113	157.31	1.45513	neg	[M-H]-	225.112806;207.100547;181.122199;59.013736;163.114123	level3	4.22168e+06
(23R,25R)-3,4-seco-17,14-friedo-9betaH-lanosta-4(28),6,8(14)-trien-26,23-olid-3-oic acid|(23R,25R)-3,4-seco-17,14-friedo-9BetaH-lanostan-4(28),6,8(14)-trien-26,23-olid-3-oic acid	0.993229	C30H44O4	467.316	603.051	0.864267	neg	[M-H]-	467.31499;421.316211;51.924621;305.067992;468.31078	level3	4.19911e+06
2-Decene-4,6,8-triyn-1-ol-Ac|Z-dehydromatricarianol acetate	0.618557	C12H10O2	187.075	288.829	0.870395	pos	[M+H]+	187.074506;172.050372;144.055732;130.040533;116.062532	level3	4.19196e+06
Turbicoryn	0.989795	C29H50O11	573.332	680.003	1.78532	neg	[M-H]-	573.332709;96.959569;63.704628;574.239887;79.957326	level3	4.16946e+06
lup-1,5,20(29)-trien-3beta-O-beta-D-glucopyranoside	0.688875	C36H56O6	585.419	800.711	1.01377	pos	[M+H]+	70.065;112.086679;113.107533;89.059234;585.46193	level3	4.16765e+06
VITEXDOIN D	0.723044	C19H16O6	341.101	245.908	0.68373	pos	[M+H]+	341.096376;137.05942;291.103094;55.017768;271.093608	level3	4.16743e+06
Cordianol C	0.802305	C31H52O6	521.381	701.837	1.18821	pos	[M+H]+	521.385903;227.129084;163.11256;135.11637;95.084907	level3	4.16476e+06
3,5,7,4',5''-pentahydroxy-6-[1-(p-hydroxy-phenyl)ethyl]flavanone	0.724114	C23H20O7	407.115	358.881	2.46601	neg	[M-H]-	407.064843;116.929043;100.933389;99.925923;371.096158	level3	4.16261e+06
1-hydroxyindolizidine	0.618532	C8H15NO	142.122	655.539	0.347056	pos	[M+H]+	142.12246;118.967322;97.100717;143.033806;83.085279	level3	4.15611e+06
Nirurine	0.864109	C12H13NO3	220.096	134.408	1.95648	pos	[M+H]+	220.098852;174.09093;192.101686;105.03301;202.087383	level3	4.14257e+06
Tripoxyrollin	0.63383	C37H64O5	589.48	791.654	1.56703	pos	[M+H]+	589.489167;259.204892;313.271603;589.506345;333.238949	level3	4.08421e+06
5-hydroxyaiphanol|5-{(E)-2-[(2R,3R)-8-hydroxy-3-(4-hydroxy-3,5-dimethoxyphenyl)-2-(hydroxymethyl)-2,3-dihydrobenzo[b][1,4]dioxin-6-yl]vinyl}benzene-1,3-diol	0.997493	C25H24O9	469.147	130.678	3.09659	pos	[M+H]+	469.142432;163.038863;470.140262;123.043764;52.128071	level3	4.06901e+06
Chromomoric acid	0.789215	C18H28O4	307.191	498.622	0.931262	neg	[M-H]-	307.189512;209.118285;289.178603;181.121774;245.192605	level3	4.06712e+06
5-Methyl-2-phenyl-2-hexenal	0.893102	C13H16O	189.127	257.437	0.315558	pos	[M+H]+	189.127418;43.017683;171.116967;156.09398;147.117148	level2	4.06243e+06
NI 15501A	0.604269	C12H15N3O3	250.107	56.1619	45.4107	pos	[M+H]+	250.120081;204.114141;70.065153;154.049658;251.121398	level3	4.06044e+06
ligerin	0.676785	C20H31ClO7	417.168	86.6202	1.17045	neg	[M-H]-	381.189778;255.06668;417.174126;135.008717;119.050154	level3	4.05397e+06
Erinapyrone C	0.969902	C8H10O5	187.059	34.9171	2.33049	pos	[M+H]+	187.074749;43.018015;85.028501;127.039061;81.03339	level2	4.02752e+06
Colubrinic acid	0.895496	C30H46O4	453.335	706.458	0.519838	pos	[M+H]+	453.334145;407.329348;435.328023;95.086073;201.164557	level2	4.02375e+06
Kainic Acid	0.715428	C10H15NO4	231.134	841.597	2.08293	pos	[M+NH4]+	231.134001;190.108235;189.11204;148.087539;149.080575	level2	4.01965e+06
cyclosieversioside C	0.718037	C42H68O14	795.456	406.788	2.16408	neg	[M-H]-	441.3394;587.393107;473.325389;795.422504;309.209523	level3	4.01343e+06
Morinol B	0.680733	C33H40O8	565.278	521.939	0.807229	pos	[M+H]+	107.048696;123.043485;399.214909;139.039024;565.367488	level3	4.00265e+06
secocularine	0.832659	C21H27NO4	356.187	693.185	2.90967	neg	[M-H]-	356.185335;194.080779;149.097755;310.190211;357.18795	level3	3.97132e+06
picein	0.665897	C14H18O7	321.096	123.933	0.0677427	pos	[M+Na]+	177.053582;145.02708;321.093199;69.033302;322.107319	level2	3.96402e+06
MS000088962	0.781865	C29H44O5	473.326	541.508	3.04059	pos	[M+H]+	473.320487;455.313574;203.144222;409.341744;189.163985	level3	3.95703e+06
13-deoxyitol A	0.99955	C20H32O5	353.23	275.464	3.83888	pos	[M+H]+	353.226121;354.230262;293.075302;265.084098;325.104718	level3	3.95155e+06
2-(1-hydroxyethyl)-naphtho<2,3-b>furan-4,9-dione	0.834657	C14H12O4	245.08	344.343	0.267967	pos	[M+H]+	217.08483;245.079452;202.061273;199.074748;160.050769	level3	3.94615e+06
7-Methoxyisomorellinol	0.620928	C34H40O8	575.269	281.493	1.82168	neg	[M-H]-	111.008679;529.268436;575.283056;89.024514;101.024944	level3	3.94325e+06
Pharboside C	0.728097	C27H44O11	543.282	367.288	4.04595	neg	[M-H]-	543.28207;96.959581;60.365836;335.222418;544.28305	level3	3.94298e+06
Asteriscanolide	0.931345	C15H22O3	251.164	415.514	2.29601	pos	[M+H]+	251.16322;193.123121;233.154657;97.028428;205.158238	level3	3.9381e+06
16alpha-acetoxy-5beta,6beta-epoxy-1-oxowitha-2,24-dienolide	0.732799	C30H40O6	497.289	471.475	0.894126	pos	[M+H]+	497.291037;437.266498;479.280953;469.290519;451.280015	level3	3.93139e+06
Methylgingerol	0.635942	C18H28O4	309.205	532.977	0.756243	pos	[M+H]+	193.123102;291.193929;71.085658;81.069265;99.080662	level3	3.93004e+06
3beta,6beta-dihydroxy-24-noroleana-12,4(23)-dien-27-oic acid	0.916587	C29H44O4	455.317	768.467	1.38032	neg	[M-H]-	455.316967;393.319261;377.283717;411.328922;50.591068	level3	3.91973e+06
LOVASTATIN	0.924322	C24H36O5	405.261	587.127	2.17937	pos	[M+H]+	405.257203;406.268336;229.122739;293.135596;81.069292	level2	3.91485e+06
Lythramine	0.660529	C29H37NO5	480.275	253.735	8.03306	pos	[M+H]+	184.073151;104.106452;480.276992;86.096025;85.028287	level3	3.91017e+06
(22E,24R)-stigmasta-1,4-dien-3-one|24-ethylcholesta-1,4-dien-3-one|stigmast-1,4-dien-3-one	0.923083	C29H46O	411.361	776.409	0.083959	pos	[M+H]+	411.366849;393.354657;95.084776;69.069834;81.069948	level3	3.91e+06
Rohitukine	0.910882	C16H19NO5	306.133	40.9121	1.18365	pos	[M+H]+	306.130185;191.068412;116.06989;161.059443;70.065124	level3	3.90304e+06
1-O-(6'',9'',12'',15''-octadecatetraenoyl)-3-O-beta-D-galactopyranosyl glycerol	0.659784	C27H44O9	513.304	371.811	0.441898	pos	[M+H]+	351.249885;513.293668;107.048681;259.204927;239.163895	level3	3.90255e+06
Eremophila-1(10),11-dien-9-one, 8.alpha.-hydroxy-	0.999811	C15H22O2	235.169	536.345	0.772862	pos	[M+H]+	235.167539;57.069589;179.104864;236.17121;86.059926	level3	3.88777e+06
Phelloside	0.800461	C32H40O17	695.2	513.518	18.6107	neg	[M-H]-	695.211982;78.959276;152.996233;100.933549;569.152587	level3	3.85242e+06
ACMC-20n674	0.6461	C22H39NO	334.31	763.625	1.49429	pos	[M+H]+	334.308528;72.080773;98.059704;95.08514;81.069326	level3	3.83734e+06
3-hydroxyhexadecanoic acid	0.974995	C16H32O3	271.228	671.55	0.724787	neg	[M-H]-	59.013815;271.227183;117.082772;211.93071;272.232043	level3	3.83152e+06
2-Furanacetic acid, tetrahydro-5-tetradecyl-, methyl ester	0.983322	C21H40O3	341.305	783.755	1.72279	pos	[M+H]+	341.305474;57.069565;71.085612;85.101002;95.085041	level3	3.83033e+06
5,4'-dihydroxy-3'-methoxyflavone-7-O-6''-n-butyryl-beta-D-glucopyranoside|luteolin-3'-O-methyl-7-O-(6''-butyryl-beta-glucopyranoside)	0.703446	C26H28O12	531.152	131.347	2.90031	neg	[M-H]-	531.14543;516.132186;365.062168;488.136329;269.079855	level3	3.80814e+06
INDENE	1	C9H8	117.07	207.259	3.63533	pos	[M+H]+	117.069548;118.0855;115.054093;91.054164;71.068074	level3	3.788e+06
belamcandaquinone D	0.974747	C39H62O5	611.466	778.897	0.171635	pos	[M+H]+	611.460407;611.514855;81.069935;95.084816;67.054494	level3	3.78794e+06
Hyacinthacine A7	0.841882	C9H17NO3	188.127	626.597	3.66935	pos	[M+H]+	84.044158;188.092916;170.119203;189.164946;85.028503	level3	3.77061e+06
cis-8,10-di-n-propyllobelidiol hydrochloride dihydrate	1	C16H33NO2	272.258	624.564	0.290307	pos	[M+H]+	272.256185;273.076888;244.261901;153.017708;147.04399	level3	3.77049e+06
5-hydroxy-6-methyl-7-[O-beta-D-glucopyranoside]- 8-aldehydo-3-(3',4'-methylenedioxybenzyl)chroman-4-one|ophiopogoside A.	0.886375	C25H26O12	517.136	127.545	1.64579	neg	[M-H]-	517.13334;161.023876;323.075447;193.049491;134.036922	level3	3.7534e+06
2-methyl-5,5'-[(8Z)-hexadec-8-ene-1,16-diyl]bisresorcinol	0.849026	C29H42O4	453.3	486.585	2.03392	neg	[M-H]-	453.306627;303.196291;225.185841;73.029431;367.264579	level3	3.75063e+06
4-AMINOBENZOIC ACID	0.948664	C7H7NO2	138.055	954.157	3.45248	pos	[M+H]+	120.044231;138.054593;114.971338;111.044388;139.039555	level2	3.74732e+06
Artocommunol CB	0.784758	C35H40O6	555.279	681.888	1.31666	neg	[M-H]-	555.28311;100.93364;537.26519;61.69853;556.27195	level3	3.74518e+06
Rhinacanthin E	0.620555	C23H22O9	443.133	252.4	0.851012	pos	[M+H]+	443.128064;383.148269;351.083675;323.088932;245.043399	level3	3.74512e+06
[5-(3,4-Dimethoxyphenyl)-4-(hydroxymethyl)tetrahydrofuran-3-yl](3,4,5-trimethoxyphenyl)methanone	0.683135	C23H28O8	431.174	299.724	0.977231	neg	[M-H]-	431.169679;116.927836;100.933543;395.148693;237.02156	level3	3.7443e+06
Kaempferitrin	0.936125	C27H30O14	755.204	44.507	2.06909	neg	[M-H]-	755.200435;300.027818;271.023238;255.02779;301.034529	level2	3.74132e+06
SCHEMBL6507566	0.864486	C19H36O5	345.263	296.092	0.463934	pos	[M+H]+	345.259359;327.253322;69.069821;81.069931;95.085686	level3	3.71688e+06
6beta,10beta-dihydroxyeremophil-7(11)-en-12,8alpha-olide	0.912922	C15H22O4	265.144	307.563	0.063405	neg	[M-H]-	265.143767;221.152729;123.081822;141.092796;97.066188	level3	3.70752e+06
gossypol	0.716103	C30H30O8	519.2	222.544	3.1639	pos	[M+H]+	137.059659;519.203854;448.150514;501.189329;365.134018	level3	3.68741e+06
(4R,5S,7R,11x)-11,12-Dihydroxy-1(10)-spirovetiven-2-one 12-glucoside	0.949022	C21H34O8	413.218	292.605	0.617935	neg	[M-H]-	413.214508;59.013744;101.024909;71.013774;85.029727	level3	3.67941e+06
Lisianthioside	0.895992	C32H44O18	715.247	133.267	3.35029	neg	[M-H]-	715.237181;167.033887;152.011112;535.17815;111.008854	level3	3.65808e+06
linearilobin	0.91633	C37H46N2O9	663.332	685.28	2.33304	pos	[M+H]+	663.32418;543.393195;664.331108;73.705337;142.937375	level3	3.65288e+06
Kukoamine A	0.775878	C28H42N4O6	553.297	453.359	0.293263	pos	[M+Na]+	553.302447;554.304628;107.049112;61.478941;391.24647	level2	3.64979e+06
Piptamine(antibiotic)	0.867742	C23H41N	332.33	584.233	0.176791	pos	[M+H]+	332.329102;91.053505;58.065082;240.269894;333.334719	level3	3.64347e+06
1,3-Cyclopentadiene, 5,5-dimethyl-1-ethyl-	1	C9H14	123.116	677.25	3.99425	pos	[M+H]+	123.043757;124.085706;95.049366;81.069299;42.033821	level3	3.62711e+06
Phyllocoumarin	0.818361	C18H14O7	343.081	170.257	1.81249	pos	[M+H]+	191.0335;343.083134;123.043738;147.044023;221.042476	level3	3.60915e+06
Camelledionol	0.993008	C29H44O3	441.335	591.226	1.13321	pos	[M+H]+	441.331094;423.328268;107.084794;442.334467;109.101369	level2	3.60584e+06
Indole-5-carboxylic acid	0.973422	C9H7NO2	160.04	1.01685	1.32673	neg	[M-H]-	116.050938;160.040359;140.84168;40.019271;158.510776	level3	3.58495e+06
23-hydroxytricosanoic Acid	0.887738	C23H46O3	369.336	842.72	1.78508	neg	[M-H]-	369.33479;323.333589;106.041503;321.312722;301.034683	level3	3.57696e+06
1-(5-Ethenyl-5-methyloxolan-2-yl)ethanone	0.605508	C9H14O2	153.092	200.108	0.430646	neg	[M-H]-	153.092091;138.068654;109.029634;122.036411;137.059726	level3	3.56768e+06
Isouvaretin	0.718177	C23H22O5	377.142	699.528	0.483621	neg	[M-H]-	377.140462;116.927641;99.926059;100.933447;84.93857	level3	3.54199e+06
6-isopentenyl-3'-O-methyltaxifolin|6-isopentenyl-3'-O-methyltaxifoline	0.83357	C21H22O7	385.13	222.472	1.56501	neg	[M-H]-	385.132384;123.04593;261.075507;175.038503;190.061693	level3	3.53829e+06
Thiersinine B	0.717655	C29H35NO7	508.23	266.58	1.76853	neg	[M-H]-	508.230584;267.194045;293.176184;311.18448;78.958695	level3	3.5239e+06
kopsiloscine C	0.950302	C22H26N2O7	431.18	45.6407	1.10533	pos	[M+H]+	431.182168;197.070553;432.174753;413.165901;251.11534	level3	3.51508e+06
ent-kaurane	0.795863	C19H28O3	303.196	703.221	0.522161	neg	[M-H]-	303.196565;275.198753;204.078754;134.894276;219.141584	level3	3.49692e+06
schisanlactone F	0.862	C30H44O4	469.331	691.08	1.56368	pos	[M+H]+	469.446803;423.329033;369.355545;203.144514;189.16494	level3	3.48814e+06
(3S,4R,8R,9E)-10-methyl-5-methylidene-6,14-dioxo-7,13-dioxatricyclo[10.2.1.0⁴,⁸]pentadeca-1(15),9-dien-3-yl 2-methylprop-2-enoate	0.80845	C19H20O6	367.116	254.592	1.86145	pos	[M+Na]+	147.044079;367.112841;119.048427;148.04654;349.071878	level2	3.48511e+06
Cyclopenol	0.729749	C17H14N2O4	311.102	81.8002	0.608315	pos	[M+H]+	311.101419;249.102531;275.081686;265.09488;231.091802	level3	3.47942e+06
Hirsutin	0.679365	C10H19NOS2	234.096	33.2417	0.411595	pos	[M+H]+	216.08635;234.09758;188.091741;102.054987;90.054914	level3	3.47611e+06
Moreollic acid	0.744617	C34H40O9	591.256	491.173	1.13144	neg	[M-H]-	591.2542;152.996427;275.199482;241.012801;78.959332	level3	3.47245e+06
3-[(Carboxycarbonyl)amino]-L-alanine	0.893151	C5H8N2O5	174.956	913.758	0.413623	neg	[M-H]-	146.960212;44.998262;118.966276;174.956189;99.926108	level2	3.46932e+06
(2R)-2-amino-6-hydroxy-4-hexynoic acid	0.966268	C6H9NO3	144.065	54.312	0.291734	pos	[M+H]+	98.059468;144.065855;99.043479;70.064936;145.050297	level3	3.45486e+06
pinoresinol O-[6-O-(E)-caffeoyl]-beta-D-glucopyranoside|Pinoresinol O-[6-O-(E)-caffeoyl]-??-D-glucopyranoside	0.758587	C35H38O14	681.217	249.779	2.87696	neg	[M-H]-	681.2063;502.151506;179.070833;161.023976;146.03584	level3	3.44205e+06
Darutigenol	0.996085	C20H34O3	345.24	489.033	2.07749	pos	[M+Na]+	345.236865;346.239304;109.101154;95.085171;81.069364	level2	3.4268e+06
1alpha-acetoxy-2alpha-benzoyloxy-6beta,9beta-difuroyloxy-4beta-hydroxy-dihydro-beta-agarofuran	0.967677	C34H36O12	637.225	251.95	1.59467	pos	[M+H]+	637.218163;440.142765;638.224077;70.804497;295.225571	level3	3.42645e+06
2beta.3beta-Dihydroxy-27-nor-oleanen-(13)-disaeure-(23.28)-28-aethylester|2beta.3beta-dihydroxy-27-nor-oleanene-(13)-dioic acid-(23.28)-28-ethyl ester|Senegensaeuremonoethylester	0.810242	C31H48O6	515.338	651.301	0.258633	neg	[M-H]-	515.345403;469.333972;111.008872;453.341051;103.441525	level3	3.42613e+06
12beta-Acetoxyiochromolide	0.639225	C32H42O9	569.272	532.266	0.267599	neg	[M-H]-	569.268446;253.214669;152.996672;241.012834;78.959322	level3	3.42519e+06
Perforine	0.716012	C18H25NO5	336.182	677.497	1.31487	pos	[M+H]+	336.179864;174.006103;188.020685;184.025782;170.009738	level3	3.41309e+06
Pyocyanin	0.924671	C13H10N2O	211.086	310.354	0.45917	pos	[M+H]+	211.085174;193.074704;169.074743;212.089889;185.069968	level3	3.40631e+06
peroxysampsone A|rel-(1R,3S,7S,9S,11R,13S)-11-benzoyl-3-(1-hydroperoxy-1-methylethyl)-6,6,10,10-tetramethyl-13-(3-methylbut-2-en-1-yl)-4,5-dioxatetracyclo[9.3.1.1(9,13).0(1,7)]hexadecane-12,14,15-trione	0.723624	C33H42O8	565.279	462.033	0.289638	neg	[M-H]-	565.278873;165.018261;78.95854;138.031756;122.038064	level3	3.40582e+06
3beta-D-glucopyranosyloxy-6alpha,16alpha,20(S),27-tetrahydroxydammar-24(Z)-ene|trilocularol A 3-glucoside	0.839509	C36H62O10	653.425	776.413	2.60577	neg	[M-H]-	89.024307;179.056766;119.034586;71.013624;101.024781	level3	3.40042e+06
Kaempferol 7,4'-dimethyl ether 3-(6''-(E)-p-coumarylglucoside)	0.745596	C32H30O13	621.161	289.33	0.772659	neg	[M-H]-	577.174343;163.039027;119.050478;413.124558;398.097329	level3	3.39235e+06
Methyl labd-13-en-15-oate	0.713838	C21H36O3	337.273	636.222	0.413856	pos	[M+H]+	337.276846;81.069955;67.054281;95.084953;69.069598	level3	3.39049e+06
Carnosol	0.976734	C20H26O4	331.19	511.19	2.24255	pos	M+H	285.181255;331.190722;267.174063;215.106259;243.138795	level1	3.38877e+06
3'-Hydroxyanhydrophlegmacin-9,10-quinone A2 5'-methyl ether	0.736081	C33H28O11	601.169	290.393	0.0833571	pos	[M+H]+	601.174604;177.053949;145.027564;323.087844;251.092094	level3	3.38746e+06
3-[1-(Methoxycarbonyl)vinyloxy]-4-hydroxybenzoic acid	0.603517	C11H10O6	239.048	30.2079	23.1808	pos	[M+H]+	89.059346;239.052955;196.035768;133.086624;214.046021	level3	3.38688e+06
Skullcapflavone II	0.974411	C19H18O8	375.106	366.372	0.581019	pos	M+H	375.109097;345.059813;327.04842;360.080809;242.249362	level1	3.37874e+06
2-Cyclohexen-1-one, 4-hydroxy-4-(3-hydroxybutyl)-3,5,5-trimethyl-	0.796988	C13H22O3	209.153	758.349	1.03357	pos	[M-H2O+H]+	209.156815;81.069892;95.084751;67.0542;173.132959	level2	3.36813e+06
Abrisapogenol F	0.781104	C30H48O2	441.372	618.694	0.661055	pos	[M+H]+	441.408779;423.363226;95.08473;137.132751;109.100994	level3	3.36558e+06
Pauciflorol F	0.916217	C21H16O6	365.1	174.057	1.99983	pos	[M+H]+	365.101064;129.139097;273.185835;70.065209;112.112615	level3	3.36541e+06
4-methoxy-3-undecylbenzene-1,2-diol	0.967186	C18H30O3	293.212	610.91	1.02142	neg	[M-H]-	293.210521;265.215578;191.180216;275.199632;248.992728	level3	3.35758e+06
Whiskey lactone	0.929276	C9H16O2	157.122	344.102	2.47551	pos	[M+H]+	69.069846;157.121983;158.152413;139.112162;55.054005	level3	3.3553e+06
(12R,20S)-12-O-(2'-O-acetyl-beta-D-glucopyranosyl)-20-hydroxy-24-methylene-3,4-secodammar-4(28)-en-3-oic acid	0.999854	C39H64O10	693.454	792.217	0.553582	pos	[M+H]+	693.450754;693.516513;505.34692;211.09338;437.210334	level3	3.35296e+06
Tepicanol A	0.934456	C44H50O7	691.366	907.851	1.56131	pos	[M+H]+	691.373165;571.419587;692.377367;76.820467;576.502472	level3	3.35216e+06
Oreosolenoside	0.755204	C32H40O17	695.212	565.686	1.89833	neg	[M-H]-	178.051699;651.214693;697.21943;134.060574;78.959358	level3	3.34465e+06
(4R)-4,5-dihydro-4-(3-hydroxy-2,6-dimethylbenzyl)-5,5-dimethylfuran-2(3H)-one|lycifuranone A	0.929872	C15H20O3	249.148	208.779	0.719001	pos	[M+H]+	249.149713;231.138156;145.100497;191.105678;189.125972	level3	3.33816e+06
10-Oxooctadecanoic acid	0.963567	C18H34O3	297.243	579.995	1.64594	neg	[M-H]-	297.240773;279.23226;191.034226;157.087964;169.123701	level3	3.33628e+06
5,7-Dihydroxy-2-heptacosylchromone	0.725123	C36H60O4	557.452	330.878	2.23363	pos	[M+H]+	557.450156;102.091397;256.260804;177.054149;374.291005	level3	3.33044e+06
methyl (2'R)-6-(2-acetoxytridecyl)-2-hydroxy-4-methoxybenzoate	1	C24H38O6	423.272	590.769	1.68124	pos	[M+H]+	127.038506;424.27373;99.043557;423.26659;81.069728	level3	3.31945e+06
ar-Artemisene	0.990279	C20H30	271.242	460.714	2.04198	pos	[M+H]+	271.057748;105.06967;81.069247;69.070012;137.13317	level2	3.3126e+06
1-(4-Hydroxy-3-methoxyphenyl)-3-decanone	0.950784	C17H26O3	261.184	348.398	0.802723	pos	[M+H]+	163.075182;261.18538;177.090879;145.065315;131.048351	level2	3.30679e+06
3-Methylisoquinoline	0.819649	C10H9N	144.08	44.4276	1.27604	pos	[M+H]+	144.080489;98.059796;99.043862;145.084899;143.073054	level3	3.30189e+06
Cichorine	0.833744	C10H11NO3	194.081	81.1696	2.43926	pos	[M+H]+	134.059404;59.048723;108.04364;106.064146;166.085602	level3	3.30145e+06
ent-6beta-acetoxy-labda-7,12E,14-triene-17-oic acid	0.944328	C22H32O4	361.235	478.734	1.91119	pos	[M+H]+	301.213599;95.084964;123.117541;361.34753;283.20292	level3	3.30012e+06
(6S)-hydroxy-(24xi)-hydroperoxy-29-nor-3,4-seco-cycloart-4(30),25-dien-3-oic acid methyl ester|Anticancer Triterpene PMV70P691-043	0.999235	C30H48O5	487.342	590.393	0.609647	neg	[M-H]-	487.348395;441.339387;54.149653;488.343556;407.329735	level3	3.29706e+06
1-Methyl-3-hydroxy-3-(2-oxopropyl)-1,2,3,4-tetrahydroquinoline-2,4-dione	0.753041	C13H13NO4	248.099	194.577	31.976	pos	[M+H]+	248.091095;206.08143;108.079865;249.091637;134.05935	level3	3.29471e+06
(2S,13R)-2,13-dihydroxy-1(10),14-ent-halimadien-18-oic acid	0.999824	C20H32O4	337.235	422.308	4.1422	pos	[M+H]+	337.232836;338.238579;196.111293;182.081779;211.133043	level3	3.29019e+06
o-Methylpellotine	0.996095	C14H21NO3	250.145	606.817	1.13069	neg	[M-H]-	250.142654;235.11911;251.147498;161.181313;59.58485	level3	3.28955e+06
N-Methylanthranilic acid	0.971701	C8H9NO2	152.07	105.062	2.04195	pos	[M+H]+	152.06993;134.059162;106.065134;153.053999;125.059926	level3	3.28844e+06
29-nor-3,4-seco-friedelan-4(23),20(30)-dien-3-oic acid	0.730486	C29H46O2	427.355	803.9	1.95949	pos	[M+H]+	427.362789;381.351098;409.341613;81.070176;147.116823	level3	3.28145e+06
20beta-hydroxy-19-oxolean|adininaonol	0.896742	C29H48O2	429.371	782.26	2.1298	pos	[M+H]+	429.371983;411.365837;95.084852;175.110347;81.069991	level3	3.27443e+06
Cannodimethosid	0.626804	C31H48O10	579.316	360.883	0.152564	neg	[M-H]-	579.327264;183.139442;165.127225;227.127989;197.153136	level3	3.27085e+06
Terminolic acid	0.98785	C30H48O6	503.337	239.322	0.839695	neg	M-H	503.342998;55.926838;111.008854;504.334111;71.013769	level1	3.26497e+06
orthodiffene A	0.674613	C19H20O7	361.128	191.493	1.00762	pos	[M+H]+	191.070931;219.063353;343.12035;163.074547;167.070948	level3	3.26041e+06
Tepurindiol	0.859647	C22H22O6	383.148	192.042	1.24666	pos	[M+H]+	383.145187;368.128172;351.124532;353.098751;291.103073	level3	3.25828e+06
vaticanol G	0.833123	C42H32O9	679.193	534.063	0.261318	neg	[M-H]-	679.192118;633.18892;180.911828;280.926264;122.975393	level3	3.24202e+06
Azadirachtin M	0.661541	C32H42O13	633.256	506.848	1.2128	neg	[M-H]-	543.263309;633.265364;541.247551;587.257081;523.241525	level3	3.23463e+06
3alpha-Hydroxyoreadone	0.865857	C14H20O4	253.143	178.18	1.45643	pos	[M+H]+	217.122578;235.133035;121.064121;93.069554;81.069896	level3	3.23286e+06
3-hydroxyoctadecanoic acid	0.74725	C18H36O3	299.259	752.283	0.341977	neg	[M-H]-	59.013813;299.256578;284.031612;136.892485;134.89427	level3	3.22684e+06
1-Hydroxy-2-acetyl-3-methyl-8-glucosyloxy-naphthalin|Musizin-8-O-??-D-glucoside|nepodin 8-O-beta-D-glucopyranoside|nepodin-8-O-beta-D-glucopyranoside|neposide	0.659979	C19H22O8	377.125	196.668	1.41177	neg	[M-H]-	215.071658;200.046153;377.12194;216.073902;59.013724	level3	3.22445e+06
Maritolide	0.872169	C14H22O4	255.158	347.829	1.44624	pos	[M+H]+	195.138436;255.063057;109.101025;57.069997;139.074542	level3	3.22392e+06
4-Acetyl-3-methylpyridine	0.997662	C8H9NO	136.075	71.2773	2.62089	pos	[M+H]+	91.053597;136.075405;137.060064;81.069313;92.057673	level2	3.20779e+06
termitomycesphin C	0.776121	C41H77NO10	742.546	838.837	1.42509	neg	[M-H]-	742.558261;742.485408;113.024725;85.02953;566.51901	level3	3.20133e+06
cyclocanthoside A	0.964142	C35H60O9	623.416	743.3	0.00489877	neg	[M-H]-	623.416932;443.351368;69.269675;89.024534;101.023752	level3	3.19535e+06
Longicalycinin A	0.754673	C34H37N5O6	610.27	362.571	2.15008	neg	[M-H]-	610.270179;152.996613;241.013516;78.959183;294.213098	level3	3.18099e+06
SCHEMBL12378831	0.750292	C16H12O6	299.055	402.017	1.96028	neg	[M-H]-	299.057207;271.023187;193.013998;192.007362;189.056114	level3	3.16778e+06
Lupenone	0.973362	C30H48O	425.376	516.688	0.040119	pos	[M+H]+	425.374297;95.085701;135.116064;121.100918;107.084588	level2	3.1667e+06
1H-Indol-3-ylacetyl-myo-inositol	0.609179	C16H19NO7	338.122	39.1925	0.73527	pos	[M+H]+	338.126367;177.054889;212.101048;320.112331;210.088666	level2	3.15454e+06
CETRIMONIUM	1	C19H42N+	284.331	589.971	2.41635	pos	[M+H]+	284.333139;285.076798;270.053542;60.080513;57.0696	level2	3.14341e+06
Tanariflavanone C	0.803934	C30H36O7	507.245	252.145	1.86425	neg	[M-H]-	461.239048;163.061153;59.013625;101.024618;89.024427	level3	3.14128e+06
(E)-venusol	0.733159	C15H16O8	323.077	69.2007	1.30244	neg	[M-H]-	145.028939;163.038775;119.05006;323.075538;129.01935	level3	3.13891e+06
(+)-Terpendole A	0.64222	C32H41NO6	534.284	444.123	1.72273	neg	[M-H]-	474.265478;249.185978;224.070569;78.959248;152.99664	level3	3.13237e+06
SCHEMBL4799817	0.818545	C16H14O6	301.072	246.558	2.94184	neg	[M-H]-	301.034603;151.003852;195.028744;178.999627;273.038047	level3	3.12803e+06
Mimosaside B	0.914525	C30H50O7	523.359	776.193	0.696297	pos	[M+H]+	523.363493;523.591062;89.059726;58.152312;211.092553	level3	3.12765e+06
tirucalla-7,25(26)-diene-3,24-dion-21,16-olide	0.647338	C30H42O4	465.303	662.799	4.66735	neg	[M-H]-	465.296827;255.233643;397.222401;421.316178;51.700364	level3	3.11911e+06
Ergosterol	0.977944	C28H44O	379.335	858.107	0.99345	pos	[M+H]+	69.069802;379.337339;83.084913;145.100769;57.069887	level2	3.10466e+06
febrifugin	0.727547	C33H42O8	565.279	445.312	2.12861	neg	[M-H]-	565.278943;165.018681;78.959186;122.03648;205.052263	level3	3.09469e+06
Segetalin A	0.732533	C31H43N7O6	608.316	596.606	2.19784	neg	M-H	112.985884;255.233243;480.310939;446.209048;608.249147	level1	3.0724e+06
26-Nor-8-oxo-alpha-onocerin	0.768927	C29H48O3	445.366	629.33	0.782279	pos	[M+H]+	409.350819;219.172342;427.359802;445.366164;201.163834	level3	3.07059e+06
3'-O-Methylviolanone	0.628438	C18H18O6	331.114	220.748	9.50981	pos	[M+H]+	107.048989;108.051683;332.118391;226.076956;165.054972	level3	3.06931e+06
METHYL PYRUVATE	0.937175	C4H6O3	103.039	33.8544	3.64242	pos	[M+H]+	103.038924;43.017656;85.028409;45.033386;104.049324	level3	3.02783e+06
nifedipine	0.675501	C17H18N2O6	347.122	45.813	1.11857	pos	[M+H]+	329.115624;347.120374;263.176785;70.06499;168.138625	level3	3.01432e+06
6,10,14-Trimethyl-5,9,13-pentadecatrien-2-one	0.909359	C18H30O	263.236	736.354	0.785297	pos	[M+H]+	263.2386;81.06997;95.086082;109.101372;245.226985	level2	3.01411e+06
hainangranatumin E	0.757313	C32H40O12	615.245	215.225	0.910132	neg	[M-H]-	567.216333;195.067212;165.055878;225.075911;180.04116	level3	3.00285e+06
6-propylpiperidin-3-ol	0.84425	C8H17NO	144.138	259.549	1.33885	pos	[M+H]+	144.138383;88.075154;57.069605;74.059758;102.091295	level3	2.9924e+06
actinostemmoside A	0.950235	C36H62O9	637.431	780.856	1.71654	neg	[M-H]-	637.437326;591.429873;116.927861;155.022227;255.473233	level3	2.98934e+06
Orthosphenic acid	0.826659	C30H48O5	489.348	507.612	15.4753	pos	[M+H]+	443.351863;489.283202;165.08999;119.085704;471.321298	level3	2.98894e+06
Hyperibone J	0.745878	C31H46O5	499.347	596.076	0.729143	pos	[M+H]+	499.347229;104.106626;184.073494;455.319381;186.076981	level3	2.98742e+06
2-(1-O-feruloyl-2-hydroxyisopropyl)-5,6-dimethoxybenzofuran	0.79018	C23H24O8	429.157	285.524	6.64262	pos	[M+H]+	429.147816;177.053831;145.027476;178.056277;137.059748	level3	2.98372e+06
cladobotric acid A	0.869132	C26H36O4	413.265	798.444	0.434612	pos	[M+H]+	413.266217;301.13892;414.266726;189.015169;171.004189	level3	2.98222e+06
7-beta-D-Glucopyranosyloxy-2-(4-methoxy-phenyl)-chromen-4-on|7-beta-D-glucopyranosyloxy-2-(4-methoxy-phenyl)-chromen-4-one|tilianin	0.755255	C22H22O9	431.133	191.598	4.91171	pos	[M+H]+	269.081247;381.109474;413.135208;367.129708;270.085293	level3	2.97143e+06
meehanine T	0.711749	C29H45N3O9	578.309	436.204	0.254502	neg	[M-H]-	520.296783;295.227842;294.213108;78.95933;581.273496	level3	2.96755e+06
Princepin	0.771769	C27H26O9	493.149	154.196	3.28342	neg	[M-H]-	493.145822;293.089569;89.024226;59.013614;71.013566	level3	2.96353e+06
methyl ganolucidate C	0.923451	C31H48O7	531.332	590.328	0.0799306	neg	[M-H]-	531.336229;469.33447;196.89507;379.260012;487.348282	level3	2.959e+06
Abietic acid	0.998253	C20H30O2	303.231	512.012	0.890785	pos	[M+H]+	303.232139;149.09617;147.080629;304.235097;189.126829	level2	2.95866e+06
Oroxylin A	0.991535	C16H12O5	283.061	204.151	0.240724	neg	[M-H]-	268.038225;283.062385;211.040826;240.041382;239.035719	level2	2.93563e+06
3-Thujanone	0.943557	C10H16O	153.127	3.27404	0.0931922	pos	[M+H]+	153.054037;43.017661;111.043201;125.060177;97.064978	level3	2.9248e+06
octadeca-9c,16t-diene-12,14-diyn-1-ol|Octadeca-9c-16t-dien-12,14-diin-1-ol|Octadecadien-(9cis.16trans)-diin-(12.14)-ol	1	C18H26O	259.205	268.96	0.526399	pos	[M+H]+	259.204539;260.113895;242.103659;213.052937;241.191632	level3	2.91249e+06
Taxuyunnanine P	0.623688	C24H38O10	485.238	386.009	0.029168	neg	[M-H]-	111.008575;87.008577;485.225913;173.008667;121.507446	level3	2.91048e+06
Obamegine	0.652608	C36H38N2O6	595.285	604.615	2.09716	pos	[M+H]+	595.291484;415.219312;283.020204;313.272348;265.006454	level2	2.90539e+06
Scortechinone H	0.62733	C34H40O8	575.27	221.637	0.590983	neg	[M-H]-	529.26918;397.22147;101.023695;71.01372;161.045871	level3	2.90441e+06
6beta-cinnamoyloxy-germacra-1(10),4-diene	0.993503	C24H32O2	353.247	720.434	0.19274	pos	[M+H]+	353.249821;354.248464;311.200333;338.223621;57.069601	level3	2.8934e+06
5-Methoxy-7-(4-hydroxyphenyl)-1-phenyl-3-heptanone	0.893364	C20H24O3	311.168	908.562	1.41728	neg	[M-H]-	311.169284;183.011967;149.09789;100.93342;98.939646	level3	2.88963e+06
2'-methoxykobusin	0.796038	C22H24O7	401.158	187.573	0.635517	pos	[M+H]+	401.15616;231.100077;219.102491;183.064499;217.084592	level3	2.88382e+06
limocinin	0.631359	C34H44O5	531.317	669.608	0.817432	neg	[M-H]-	531.32154;281.248506;113.023678;249.059839;75.008829	level3	2.88243e+06
glycerol mono-(E)-8,11,12-trihydroxy-9-octadecenoate	0.807717	C21H40O7	403.27	325.169	0.528203	neg	[M-H]-	329.232803;311.2217;211.133045;199.132621;403.119886	level3	2.87836e+06
9,12,13-trihydroxy-10-octadecenoic acid	0.782109	C18H34O5	331.247	325.286	1.2271	pos	[M+H]+	331.0777;295.223915;277.217733;316.058659;69.070027	level2	2.8353e+06
3alpha-O-trans-feruloyl-2alpha-hydroxy-12-ursen-28-oic acid	0.925221	C40H56O7	647.396	677.75	0.774302	neg	[M-H]-	647.402526;175.039762;632.366992;160.016207;133.029504	level3	2.82746e+06
Scortechinone T	0.739724	C35H44O9	607.296	266.938	2.03382	neg	[M-H]-	561.28155;563.185151;163.038351;89.024318;71.013593	level3	2.82129e+06
3,4-Dihydro-8-oxylato-6,7-dimethoxy-2-methylisoquinolinium	1	C12H15NO3	222.112	39.7513	0.268403	pos	[M+H]+	222.111278;223.107899;162.089817;205.097675;204.100189	level3	2.81042e+06
ent-18-acetoxy-3beta,7alpha,17-trihydroxy-15beta,16beta-epoxykaurane	0.994223	C22H34O6	395.24	597.303	1.89634	pos	[M+H]+	395.243145;349.236009;396.244877;303.225818;88.736648	level3	2.80681e+06
Morusimic acid B	1	C18H35NO4	330.263	477.758	0.90488	pos	[M+H]+	330.26635;331.081261;73.02876;316.060034;284.258375	level3	2.80402e+06
Sublanceoside C1	0.959509	C39H58O13	735.392	907.851	0.150259	pos	[M+H]+	735.394441;184.073633;615.435998;735.561842;86.096076	level3	2.79273e+06
Berlambine	0.977582	C20H17NO5	352.116	374.257	1.96024	pos	M+H	352.120501;337.091439;322.072117;308.093667;353.121551	level1	2.79184e+06
Kaempferol 3-(6''-rhamnosylsophoroside)	0.854898	C33H40O20	757.217	93.8168	0.494122	pos	[M+H]+	287.057187;85.028408;757.265107;83.048954;288.058399	level2	2.78948e+06
2,8-Dimethyl-2-[(3E,7E)-4,8,12-trimethyltrideca-3,7,11-trienyl]-7-formyl-chroman-6-ol	0.814766	C28H40O3	425.305	390.035	1.9787	pos	[M+H]+	425.300691;151.075549;137.059605;107.084865;407.291163	level3	2.77132e+06
Gingerglycolipid B	0.764052	C33H58O14	677.373	557.273	1.65105	neg	[M-H]-	279.232073;397.13521;415.146465;101.024662;89.024306	level3	2.77009e+06
makisterone C 2,3;20,22-diacetonide|rel-(1S,3aS,5aR,6aR,9aS,10aR,10bR,12aR)-1-[(4R,5R)-5-[(2R)-2-ethyl-3-hydroxy-3-methylbutyl]-2,2,4-trimethyl-1,3-dioxolan-4-yl]-1,2,3a,5a,6,6a,9a,10,10a,10b,11,12,12a-tetradecahydro-3a-hydroxy-8,8,10a,12a-tetramethyl-5H-cyclopenta[7,8]phenanthro[2,3-d][1,3]dioxol-5-one	0.999429	C35H56O7	587.393	577.988	1.66992	neg	[M-H]-	587.393344;65.266985;588.404057;227.89908;229.593176	level3	2.75897e+06
2-Aminobenzimidazole	0.80936	C7H7N3	132.057	908.565	3.18403	neg	[M-H]-	132.05711;91.029782;132.867834;67.030289;105.046073	level2	2.75661e+06
alpha-D-glucopyranuronosyl-(1->3)-alpha-L-rhamnopyranosyl-(1->2)-alpha-rhamnopyranose	0.785328	C18H30O15	487.165	46.4063	0.383815	pos	[M+H]+	85.028259;127.038782;145.050146;487.185531;97.028105	level3	2.75559e+06
Pinoresinol dimethyl ether	0.999999	C22H26O6	409.162	392.975	1.46763	pos	[M+Na]+	409.162701;410.166664;408.270093;377.254765;303.187797	level2	2.74905e+06
Integrifoside C	0.847091	C21H36O9	433.241	327.061	1.48683	pos	[M+H]+	415.22962;227.128758;125.095126;97.10029;245.139393	level3	2.74122e+06
Secoeremopetasitolide B	0.915749	C21H30O7	393.194	233.136	1.77327	neg	[M-H]-	393.193798;79.957265;191.075128;80.965551;329.23163	level3	2.73889e+06
deacetyllittoraloin	0.647532	C26H30O12	533.167	139.743	1.47169	neg	[M-H]-	533.163755;371.115388;159.04431;282.089315;281.079903	level3	2.72945e+06
Dipiperitylmagnolol	0.939902	C38H50O2	539.394	653.096	2.62833	pos	[M+H]+	539.38679;121.101214;245.139727;540.41258;95.085133	level3	2.72901e+06
Flavidulol C	1	C34H42O4	515.319	651.322	1.20967	pos	[M+H]+	515.323421;516.32089;57.258952;107.049008;95.084965	level2	2.70865e+06
Halfordamine	0.820894	C12H13NO4	236.091	38.6463	1.67864	pos	[M+H]+	236.092041;218.082509;175.062653;176.070824;190.083937	level3	2.70611e+06
Sucrose	0.994589	C12H22O11	341.108	32.4451	1.09877	neg	[M-H]-	59.013727;89.024431;341.109727;71.01374;179.056913	level2	2.7017e+06
7,3',4'-Tri-O-methylluteolin	0.993062	C18H16O6	329.101	437.817	1.17392	pos	M+H	329.102355;313.073314;314.079814;285.077293;330.106838	level1	2.70118e+06
Fragransin B2	0.706988	C22H28O7	405.19	150.437	0.412912	pos	[M+H]+	167.071113;193.084167;163.074888;355.154191;161.059096	level2	2.70117e+06
methyl (4aR,7S,7aS)-octahydro-3,5-dioxocyclopenta[c]pyran-7-carboxylate|torrilliolide	0.971839	C10H12O5	213.074	45.4203	2.36966	pos	[M+H]+	213.124322;123.090978;70.064982;214.109883;167.100331	level3	2.69779e+06
(2E)-2-dodecylidene-3-hydroxy-4-methoxy-4-methylbutanolide|(2E,3R,4S)-2-dodecylidene-3-hydroxy-4-methoxy-4-methylbutanolide|litseakolide H	0.959725	C18H32O4	311.222	513.88	0.163065	neg	[M-H]-	311.222061;293.209407;200.104126;183.012221;59.013742	level3	2.69554e+06
1alpha-chloro-2beta-hydroxyeremophil-7(11),9-dien-8-one	0.776364	C15H21ClO2	269.133	76.4671	18.0871	pos	[M+H]+	269.128863;251.115488;197.070221;182.08419;233.107472	level3	2.69436e+06
Tsibulin 2	0.930581	C11H18O2	183.137	552.996	0.822259	pos	[M+H]+	183.136183;71.012372;57.069606;55.054298;113.059202	level2	2.69124e+06
rumphioside A	0.629818	C27H36O13	567.207	102.403	0.443129	neg	[M-H]-	329.139382;567.221491;341.138773;243.123359;314.116266	level3	2.69049e+06
Methyl 2-aminobenzoate	0.660118	C8H9NO2	152.07	253.845	2.00787	pos	[M+H]+	152.070221;124.075867;120.044719;110.059898;138.055461	level2	2.66959e+06
Panaxcerol C	0.82738	C45H74O10	775.53	874.902	0.158137	pos	[M+H]+	775.526724;775.474883;519.292264;776.538227;497.305388	level3	2.66818e+06
Niazimin A	0.924081	C18H25NO8	384.164	39.4967	3.52944	pos	[M+H]+	384.164041;258.111435;178.050291;293.122421;385.169228	level2	2.66289e+06
2-Linoleoyl Glycerol	0.824168	C21H38O4	355.284	612.634	2.27607	pos	[M+H]+	263.238689;245.226363;81.069961;95.084816;109.100988	level2	2.6533e+06
Palmitic acid	0.999344	C16H32O2	255.233	23.8535	0.746571	neg	[M-H]-	255.233239;101.767607;270.45639;114.498855;52.421692	level2	2.65259e+06
1-(2,2-Dimethyl-5-methoxy-2H-1-benzopyran-6-yl)-3-(1,3-benzodioxol-5-yl)propane-1,3-dione	0.70868	C22H20O6	381.127	377.771	12.8388	pos	[M+H]+	177.053959;131.04826;381.136536;145.027524;103.053877	level3	2.64462e+06
13-Isopropylpodocarpen-12-ol-20-al	0.957107	C20H28O2	301.215	542.079	0.042848	pos	[M+H]+	301.21424;286.044504;259.170369;302.222624;213.128516	level3	2.63596e+06
(Z)-heptadeca-9,16-dien-7-one	0.820918	C17H30O	251.236	558.044	0.311151	pos	[M+H]+	251.233846;153.126496;69.0699;55.017897;83.085035	level3	2.62405e+06
Hattushoside	0.643039	C28H36O15	613.218	634.653	1.47956	pos	[M+H]+	613.22312;374.986147;313.271968;314.969768;200.968906	level3	2.62404e+06
Xylocarpin C	0.601774	C33H42O13	645.257	216.43	3.08571	neg	[M-H]-	195.067637;597.236009;389.164771;645.272702;225.076268	level3	2.62209e+06
Echinocystic acid	0.988494	C30H48O4	471.348	652.233	0.774098	neg	[M-H]-	471.341929;427.360005;453.339617;52.372507;472.350484	level2	2.61967e+06
Garcihombronane B	0.929026	C31H50O5	501.357	701.362	1.60875	neg	[M-H]-	455.351541;344.407573;145.949744;122.021897;87.217675	level3	2.60975e+06
8-Ethyl-10-propyllobelidiol	0.881621	C15H31NO2	258.242	415.576	0.757966	pos	[M+H]+	258.241704;73.027989;212.234845;57.069602;259.059064	level3	2.60783e+06
benzoyl beta-D-glucopyranosyl-(1->6)-beta-D-glucopyranoside	0.673574	C19H26O12	445.135	48.7489	0.0845044	neg	[M-H]-	445.13594;195.064431;59.013699;249.063251;71.013726	level3	2.60037e+06
Methyl 6-hydroxy-11beta-acetoxy-12alpha-(2-methylbutanoyloxy)-3,7-dioxo-14beta,15beta-epoxy-1,5-meliacadien-29-oate	0.819299	C34H40O11	625.263	583.172	1.65656	pos	[M+H]+	625.264426;552.241926;479.200277;581.267428;626.260031	level3	2.59996e+06
Isocimicifugamide	0.832534	C25H31NO10	506.201	44.2493	0.295632	pos	[M+H]+	506.207214;488.193399;191.068302;336.142825;198.110721	level3	2.59923e+06
Methyl (2E,6Z)-dodecadienoate	0.713956	C13H22O2	211.169	131.921	1.01749	pos	[M+H]+	179.069708;109.101084;167.070877;135.115954;211.094422	level2	2.59518e+06
Eupatorin	0.993384	C18H16O7	345.095	329.267	1.64449	pos	M+H	345.098033;312.065183;330.071982;284.068526;346.100468	level1	2.58502e+06
16-Hydroxy-10-oxohexadecanoic acid	0.861807	C16H30O4	287.222	268.875	2.04751	pos	[M+H]+	251.200897;95.0858;81.069872;269.212602;288.124153	level2	2.58382e+06
Rhaponticin	1	C21H24O9	421.146	65.4075	0.829076	pos	[M+H]+	421.14469;422.171942;137.059967;70.065124;123.043765	level2	2.57078e+06
9-stearolic acid	0.737724	C18H32O2	279.233	626.165	1.1099	neg	[M-H]-	279.232178;134.894171;243.789497;241.791262;116.929179	level3	2.57023e+06
ent-1alpha,7beta,14alpha-triacetoxy-kaur-16-en-15-one	0.968665	C26H36O7	461.251	311.941	2.25217	pos	[M+H]+	461.254814;462.254548;51.25074;324.156996;299.197636	level3	2.56731e+06
Hibiscitrin	0.90557	C21H20O14	495.08	37.9719	1.82637	neg	[M-H]-	495.083605;333.030307;161.024023;55.009613;315.019736	level3	2.54362e+06
2,2,6,6-Tetramethyl-4-piperidinone	0.708846	C9H17NO	156.138	599.336	1.98291	pos	[M+H]+	156.138489;139.110601;97.100656;69.069959;55.054163	level2	2.52083e+06
Gelseiridone	0.762192	C29H34N2O8	537.24	324.947	29.0052	neg	[M-H]-	537.23572;163.041014;119.050012;179.033419;164.042622	level3	2.50915e+06
Segetalin B	0.978727	C24H32N6O5	483.237	242.426	0.449537	neg	M-H	483.229921;152.996353;78.959216;80.965478;96.959559	level1	2.50659e+06
7-Hydroxy-6-methyl-2H-1-benzopyran-2-one	0.964527	C10H8O3	177.054	383.474	0.699768	pos	[M+H]+	147.044277;177.054132;119.048656;178.047353;145.027762	level2	2.48887e+06
Gliocladinin A	0.940145	C21H22O6	369.129	369.56	13.9919	neg	[M-H]-	369.130273;263.093538;189.056123;119.050146;235.096813	level3	2.48742e+06
Daphnigraciline	0.891003	C23H35NO4	390.263	925.98	0.123397	pos	[M+H]+	390.26631;372.257795;358.234816;391.265332;84.488087	level3	2.45849e+06
Quadrangularic acid L	0.710961	C30H50O6	505.344	341.981	18.8093	neg	[M-H]-	443.349357;505.356657;425.341379;461.358849;441.339802	level3	2.44373e+06
Byakangelicin	0.789591	C17H18O7	393.119	131.559	1.13904	neg	M+CH3COO	231.065685;216.044079;393.119341;197.080985;179.071038	level1	2.43128e+06
Progesterone	0.988888	C21H30O2	315.231	766.128	0.225796	pos	[M+H]+	315.232227;69.069954;133.101281;83.085206;149.133073	level2	2.43055e+06
Dimethylcurcumin	0.992713	C23H24O6	397.164	241.049	0.17592	pos	[M+H]+	397.164836;137.060032;379.154891;398.161939;273.109975	level2	2.42466e+06
(9R,10S,12Z)-9,10-Dihydroxy-8-oxo-12-octadecenoic acid	0.887634	C18H32O5	329.231	296.969	0.567732	pos	[M+H]+	329.10019;293.213895;296.066875;95.086067;81.069284	level2	2.42031e+06
deniculatin	0.819732	C34H56O11	639.376	357.191	3.41062	neg	[M-H]-	639.372648;593.364956;315.200496;577.174536;71.043255	level3	2.4151e+06
N-2'-methylbutyl-2E,4E-decadienamide	0.683548	C15H27NO	238.216	677.25	1.59307	pos	[M+H]+	238.217588;221.1881;203.178837;81.069952;95.084709	level3	2.41277e+06
vomifoliol 9-O-arabinofuranosyl-D-glucopyranoside	0.783236	C24H38O12	517.228	188.941	2.76264	neg	[M-H]-	517.232104;111.008423;249.062128;113.0244;59.013605	level3	2.41159e+06
Manglieside E	0.625768	C28H38O13	581.222	107.824	1.10334	neg	[M-H]-	389.164322;208.073485;205.087271;190.064899;419.175142	level3	2.40119e+06
Spiradine F	0.983702	C24H33NO4	398.232	767.343	2.16578	neg	[M-H]-	398.23026;324.160854;380.227082;399.233509;366.211036	level3	2.39862e+06
nevadensine	0.791218	C23H35NO6	422.255	486.429	0.330542	pos	[M+H]+	104.10657;422.246528;184.073858;390.227015;124.999869	level3	2.39784e+06
(2S)-naringenin 7-O-[5-O-trans-cinnamoyl-beta-D-apiosyl(1->2)]-beta-D-glucopyranoside|visartiside C	0.641049	C35H36O15	695.195	701.649	0.205156	neg	[M-H]-	555.282014;116.927726;695.190153;100.933616;238.835946	level3	2.39445e+06
Eicosanyl-trans-p-coumarate	0.837104	C29H48O3	445.366	783.601	0.660126	pos	[M+H]+	445.368667;427.362179;95.085806;57.070128;69.070042	level3	2.39139e+06
Mallotochromene	0.711731	C24H26O8	443.169	270.893	0.325156	pos	[M+H]+	385.152605;384.155244;353.130478;231.066532;370.128031	level2	2.3892e+06
Javanicin B	0.764265	C21H28O6	377.199	340.503	2.07582	pos	[M+H]+	277.218332;359.188908;377.245957;67.054484;81.070161	level3	2.37971e+06
DTXSID40854943	0.95054	C14H24O3	239.165	366.711	0.87635	neg	[M-H]-	239.164297;221.152561;183.139738;209.154985;59.013738	level3	2.37816e+06
Armillaramide	0.71087	C34H69NO4	556.529	756.205	0.611825	pos	[M+H]+	556.534472;283.265343;556.4872;300.287358;557.532409	level3	2.37655e+06
1H-Indole-3-carboxaldehyde	0.905014	C9H7NO	144.045	125.222	2.18369	neg	[M-H]-	144.044952;127.003299;83.013888;100.933818;145.014584	level2	2.36923e+06
Maltopentaose	0.929164	C30H52O26	827.264	48.8484	2.6903	neg	[M-H]-	161.046145;101.02492;221.065787;545.167884;383.117283	level2	2.36089e+06
beta-Sitostenone	0.933454	C29H48O	413.376	794.532	2.11271	pos	[M+H]+	413.37741;395.363378;159.116157;95.085647;69.069703	level2	2.35874e+06
[truncated: 658 more rows]
